# Supplementary material
Source: PubMed Central journal article supplement (PMC6682012)
Supplement: ao9b01376_si_001.pdf [file ao9b01376_si_001.pdf]

## Supporting Information

### A Unified Approach towards Syntheses of Juglomycins and Their Derivatives

Kai Yoshioka,<sup>†,||</sup> Shogo Kamo,<sup>†,‡,||</sup> Keisuke Hosaka,<sup>‡</sup> Ryohei Sato,<sup>‡</sup> Yuma Miikeda,<sup>‡</sup> Yuri Manabe,<sup>†</sup> Shusuke Tomoshige,<sup>‡</sup> Kazunori Tsubaki,<sup>†</sup> Kouji Kuramochi<sup>‡,\*</sup>

<sup>†</sup>Graduate School for Life and Environmental Sciences, Kyoto Prefectural University, 1-5 Shimogamo Hangi-cho, Sakyo-ku, Kyoto 606-8522, Japan

<sup>‡</sup>Department of Applied Biological Science, Faculty of Science and Technology, Tokyo University of Science, 2641 Yamazaki, Noda, Chiba 278-8510, Japan

\*Corresponding author.

||K.Y. and S.K. contributed equally.

#### Index

**Table S1. NMR Spectroscopic Data for Natural and Synthetic Juglomycin Z (7)** page S3

**Table S2. NMR Spectroscopic Data for Compound 19 Derived from Natural and Synthetic 7** page S4

**Table S3. NMR Spectroscopic Data for Compound 19 Derived from Natural Juglomycin Z and Compound 21** page S5

#### NMR Spectra of New Compounds

- Figure S1.** <sup>1</sup>H NMR spectrum (400 MHz, CDCl<sub>3</sub>, TMS) of compound **17**. page S6
- Figure S2.** <sup>13</sup>C{<sup>1</sup>H} NMR spectrum (100 MHz, CDCl<sub>3</sub>) of compound **17**. page S7
- Figure S3.** <sup>1</sup>H NMR spectrum (400 MHz, CDCl<sub>3</sub>, TMS) of compound **10**. page S8
- Figure S4.** <sup>13</sup>C{<sup>1</sup>H} NMR spectrum (100 MHz, CDCl<sub>3</sub>) of compound **10**. page S9
- Figure S5.** <sup>1</sup>H NMR spectrum (400 MHz, CDCl<sub>3</sub>, TMS) of compound **11**. page S10
- Figure S6.** <sup>13</sup>C{<sup>1</sup>H} NMR spectrum (100 MHz, CDCl<sub>3</sub>) of compound **11**. page S11
- Figure S7.** <sup>1</sup>H NMR spectrum (400 MHz, CDCl<sub>3</sub>, TMS) of compound **12**. page S12
- Figure S8.** <sup>13</sup>C{<sup>1</sup>H} NMR spectrum (100 MHz, CDCl<sub>3</sub>) of compound **12**. page S13
- Figure S9.** <sup>1</sup>H NMR spectrum (400 MHz, acetone-d<sub>6</sub>) of compound **1**. page S14
- Figure S10.** <sup>13</sup>C{<sup>1</sup>H} NMR spectrum (100 MHz, acetone-d<sub>6</sub>) of compound **1**. page S15
- Figure S11.** <sup>1</sup>H NMR spectrum (400 MHz, acetone-d<sub>6</sub>, TMS) of compound **2**. page S16
- Figure S12.** <sup>13</sup>C{<sup>1</sup>H} NMR spectrum (100 MHz, acetone-d<sub>6</sub>) of compound **2**. page S17
- Figure S13.** <sup>1</sup>H NMR spectrum (400 MHz, CD<sub>2</sub>Cl<sub>2</sub>) of compound **8**. page S18
- Figure S14.** <sup>13</sup>C{<sup>1</sup>H} NMR spectrum (100 MHz, CD<sub>2</sub>Cl<sub>2</sub>) of compound **8**. page S19
- Figure S15.** <sup>1</sup>H NMR spectrum (400 MHz, CD<sub>2</sub>Cl<sub>2</sub>) of compound **4-epi-8**. page S20

|                                                                                                                                  |          |
|----------------------------------------------------------------------------------------------------------------------------------|----------|
| <b>Figure S16.</b> $^{13}\text{C}\{^1\text{H}\}$ NMR spectrum (100 MHz, $\text{CD}_2\text{Cl}_2$ ) of compound 4- <i>epi</i> -8. | page S21 |
| <b>Figure S17.</b> $^1\text{H}$ NMR spectrum (400 MHz, acetone- $d_6$ , TMS) of compound 3.                                      | page S22 |
| <b>Figure S18.</b> $^{13}\text{C}\{^1\text{H}\}$ NMR spectrum (100 MHz, acetone- $d_6$ ) of compound 3.                          | page S23 |
| <b>Figure S19.</b> $^1\text{H}$ NMR spectrum (400 MHz, acetone- $d_6$ ) of compound 6.                                           | page S24 |
| <b>Figure S20.</b> $^{13}\text{C}\{^1\text{H}\}$ NMR spectrum (100 MHz, acetone- $d_6$ ) of compound 6.                          | page S25 |
| <b>Figure S21.</b> $^1\text{H}$ NMR spectrum (400 MHz, $\text{CDCl}_3$ , TMS) of compound 15.                                    | page S26 |
| <b>Figure S22.</b> $^{13}\text{C}\{^1\text{H}\}$ NMR spectrum (100 MHz, $\text{CDCl}_3$ ) of compound 15.                        | page S27 |
| <b>Figure S23.</b> $^1\text{H}$ NMR spectrum (400 MHz, $\text{CD}_3\text{OD}$ , TMS) of compound 5.                              | page S28 |
| <b>Figure S24.</b> $^{13}\text{C}\{^1\text{H}\}$ NMR spectrum (100 MHz, $\text{CD}_3\text{OD}$ ) of compound 5.                  | page S29 |
| <b>Figure S25.</b> $^1\text{H}$ NMR spectrum (400 MHz, $\text{CDCl}_3$ , TMS) of compound 16.                                    | page S30 |
| <b>Figure S26.</b> $^{13}\text{C}\{^1\text{H}\}$ NMR spectrum (100 MHz, $\text{CDCl}_3$ ) of compound 16.                        | page S31 |
| <b>Figure S27.</b> $^1\text{H}$ NMR spectrum (400 MHz, $\text{CDCl}_3/\text{CD}_3\text{OD} = 9/1$ , TMS) of compound 7.          | page S32 |
| <b>Figure S28.</b> $^{13}\text{C}\{^1\text{H}\}$ NMR spectrum (100 MHz, $\text{CDCl}_3$ ) of compound 7.                         | page S33 |
| <b>Figure S29.</b> $^1\text{H}$ NMR spectrum (400 MHz, $\text{CDCl}_3$ , TMS) of compound 19.                                    | page S34 |
| <b>Figure S30.</b> $^{13}\text{C}\{^1\text{H}\}$ NMR spectrum (100 MHz, $\text{CDCl}_3$ ) of compound 19.                        | page S35 |
| <b>Figure S31.</b> $^1\text{H}$ NMR spectrum (400 MHz, $\text{CDCl}_3$ , TMS) of compound 24.                                    | page S36 |
| <b>Figure S32.</b> $^{13}\text{C}\{^1\text{H}\}$ NMR spectrum (100 MHz, $\text{CDCl}_3$ ) of compound 24.                        | page S37 |
| <b>Figure S33.</b> $^1\text{H}$ NMR spectrum (400 MHz, $\text{CDCl}_3$ ) of compound 26.                                         | page S38 |
| <b>Figure S34.</b> $^{13}\text{C}\{^1\text{H}\}$ NMR spectrum (100 MHz, $\text{CDCl}_3$ ) of compound 26.                        | page S39 |
| <b>Figure S35.</b> $^1\text{H}$ NMR spectrum (400 MHz, $\text{CDCl}_3$ ) of compound 27.                                         | page S40 |
| <b>Figure S36.</b> $^{13}\text{C}\{^1\text{H}\}$ NMR spectrum (100 MHz, $\text{CDCl}_3$ ) of compound 27.                        | page S41 |
| <b>Figure S37.</b> $^1\text{H}$ NMR spectrum (400 MHz, $\text{CDCl}_3$ , TMS) of compound 28.                                    | page S42 |
| <b>Figure S38.</b> $^{13}\text{C}\{^1\text{H}\}$ NMR spectrum (100 MHz, $\text{CDCl}_3$ ) of compound 28.                        | page S43 |
| <b>Figure S39.</b> $^1\text{H}$ NMR spectrum (400 MHz, $\text{CDCl}_3$ , TMS) of compound 29.                                    | page S44 |
| <b>Figure S40.</b> $^{13}\text{C}\{^1\text{H}\}$ NMR spectrum (100 MHz, $\text{CDCl}_3$ ) of compound 29.                        | page S45 |
| <b>Figure S41.</b> $^1\text{H}$ NMR spectrum (400 MHz, acetone- $d_6$ ) of compound 20.                                          | page S46 |
| <b>Figure S42.</b> $^{13}\text{C}\{^1\text{H}\}$ NMR spectrum (100 MHz, acetone- $d_6$ ) of compound 20.                         | page S47 |
| <b>Figure S43.</b> $^1\text{H}$ NMR spectrum (400 MHz, $\text{CDCl}_3$ , TMS) of compound 21.                                    | page S48 |
| <b>Figure S44.</b> $^{13}\text{C}\{^1\text{H}\}$ NMR spectrum (100 MHz, $\text{CDCl}_3$ ) of compound 21.                        | page S49 |
| <b>Reference</b>                                                                                                                 | page S50 |

**Table S1. NMR Spectroscopic Data for Natural and Synthetic Juglomycin Z (7)**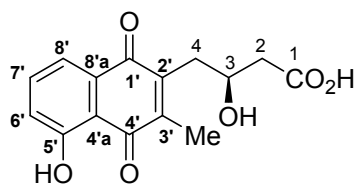**Juglomycin Z (7)**

| position <sup>a</sup> | natural 7 <sup>b</sup> |                                              | synthetic 7 <sup>c</sup> |                      | $\Delta\delta_C$ (ppm) | $\Delta\delta_H$ (ppm) |
|-----------------------|------------------------|----------------------------------------------|--------------------------|----------------------|------------------------|------------------------|
|                       | $\delta_C$             | $\delta_H$ (J in Hz)                         | $\delta_C$               | $\delta_H$ (J in Hz) |                        |                        |
| 1                     | 174.7                  |                                              | 176.2                    | —                    | -1.5                   |                        |
| 2                     | 42.0                   | 2.56, m, 2H                                  | 41.2                     | 2.57, m, 2H          | +0.8                   | -0.01                  |
| 3                     | 67.9                   | 4.28, m                                      | 67.5                     | 4.23, m              | +0.4                   | +0.05                  |
|                       |                        | —                                            |                          | —                    |                        |                        |
| 4                     | 36.8                   | 3.09, dd (12.6, 7.5)<br>3.27, dd (12.6, 4.0) | 34.0                     | 2.89, d (6.6), 2H    | +2.8                   | +0.20<br>+0.38         |
| 1'                    | 182.2                  |                                              | 184.8                    |                      | -2.6                   |                        |
| 2' or 3'              | 148.4                  |                                              | 144.2                    |                      | +4.2                   |                        |
| 3' or 2'              | 149.6                  |                                              | 145.9                    |                      | +3.7                   |                        |
| 3'-Me                 | 18.5                   | 2.67, s                                      | 12.8                     | 2.26, s              | +5.7                   | +0.41                  |
| 4'                    | 186.6                  |                                              | 190.1                    |                      | -3.5                   |                        |
| 4'a                   | 115.8                  |                                              | 114.9                    |                      | +0.9                   |                        |
| 5'                    | 161.6                  |                                              | 161.2                    |                      | +0.4                   |                        |
| 6'                    | 124.1                  | 7.25, dd (8.0, 2.0)                          | 124.1                    | 7.24, dd (7.0, 2.6)  | 0                      | +0.01                  |
| 7'                    | 136.7                  | 7.64, m                                      | 136.1                    | 7.60, m              | +0.6                   | +0.04                  |
| 8'                    | 119.8                  | 7.63, m                                      | 119.2                    | 7.61, m              | +0.6                   | +0.02                  |
| 8'a                   | 132.3                  |                                              | 131.9                    |                      | +0.4                   |                        |

<sup>a</sup>Carbon atoms have been labeled using the IUPAC numbering system.

<sup>b</sup><sup>1</sup>H NMR (200 MHz, CDCl<sub>3</sub>/CD<sub>3</sub>OD) and <sup>13</sup>C NMR (50.3 MHz, CDCl<sub>3</sub>).<sup>S1</sup>

<sup>c</sup><sup>1</sup>H NMR (400 MHz, CDCl<sub>3</sub>/CD<sub>3</sub>OD = 9/1, TMS) and <sup>13</sup>C NMR (100 MHz, CDCl<sub>3</sub>).

**Table S2. NMR Spectroscopic Data for Compound 19 Derived from Natural and Synthetic 7<sup>[S1]</sup>**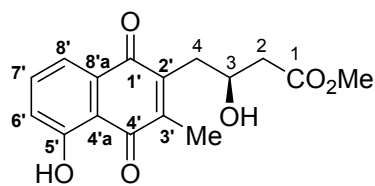**19**

| position <sup>a</sup> | 19 derived from natural 7 <sup>b</sup> |                                              | 19 derived from synthetic 7 <sup>c</sup> |                                              | $\Delta\delta_C$ (ppm) | $\Delta\delta_H$ (ppm) |
|-----------------------|----------------------------------------|----------------------------------------------|------------------------------------------|----------------------------------------------|------------------------|------------------------|
|                       | $\delta_C$                             | $\delta_H$ (J in Hz)                         | $\delta_C$                               | $\delta_H$ (J in Hz)                         |                        |                        |
| 1                     | 172.6                                  |                                              | 172.8                                    | —                                            | -0.2                   |                        |
| 2                     | 41.2                                   | 2.58, dd (15.5, 7.5)<br>2.63, dd (15.5, 5.5) | 41.3                                     | 2.58, dd (16.6, 7.8)<br>2.65, dd (16.6, 4.2) | -0.1                   | 0<br>-0.02             |
| 3                     | 67.7                                   | 4.28, m<br>—                                 | 67.7                                     | 4.24, m<br>—                                 | 0                      | +0.04                  |
| 4                     | 36.0                                   | 3.09, dd (12.6, 7.5)<br>3.27, dd (12.6, 4.5) | 34.0                                     | 2.87, m, 2H                                  | +2.0                   | +0.22<br>+0.40         |
| 1'                    | 182.0                                  |                                              | 184.6                                    |                                              | -2.6                   |                        |
| 2' or 3'              | 147.9                                  |                                              | 144.4                                    |                                              | +3.5                   |                        |
| 3' or 2'              | 149.2                                  |                                              | 145.7                                    |                                              | +3.5                   |                        |
| 3'-Me                 | 18.4                                   | 2.65, s                                      | 12.7                                     | 2.25                                         | +5.7                   | +0.40                  |
| 4'                    | 186.3                                  |                                              | 190.2                                    |                                              | -3.9                   |                        |
| 4'a                   | 115.4                                  |                                              | 115.0                                    |                                              | +0.4                   |                        |
| 5'                    | 161.6                                  |                                              | 161.2                                    |                                              | +0.4                   |                        |
| 6'                    | 124.0                                  | 7.25, dd (8.0, 2.0)                          | 124.0                                    | 7.23, dd (7.8, 1.8)                          | 0                      | +0.02                  |
| 7'                    | 136.3                                  | 7.63, dd (8.0, 7.8)                          | 136.0                                    | 7.57, dd (7.8, 7.6)                          | +0.3                   | +0.06                  |
| 8'                    | 119.5                                  | 7.61, dd (7.8, 2.0)                          | 119.1                                    | 7.61, dd (7.4, 1.8)                          | +0.4                   | 0                      |
| 8'a                   | 131.8                                  |                                              | 132.0                                    |                                              | -0.2                   |                        |
| OMe                   | 51.8                                   | 3.72, s                                      | 51.9                                     | 3.72, s                                      | -0.1                   | 0                      |
| OH                    |                                        | 11.9                                         |                                          | 12.13                                        |                        | -0.23                  |

<sup>a</sup>Carbon atoms have been labeled using the IUPAC numbering system.

<sup>b</sup><sup>1</sup>H NMR (200 MHz, CDCl<sub>3</sub>) and <sup>13</sup>C NMR (50.3 MHz, CDCl<sub>3</sub>).<sup>S1</sup>

<sup>c</sup><sup>1</sup>H NMR (400 MHz, CDCl<sub>3</sub>, TMS) and <sup>13</sup>C NMR (100 MHz, CDCl<sub>3</sub>).

**Table S3. NMR Spectroscopic Data for Compound 19 Derived from Natural Juglomycin Z<sup>[S1]</sup> and Compound 21**

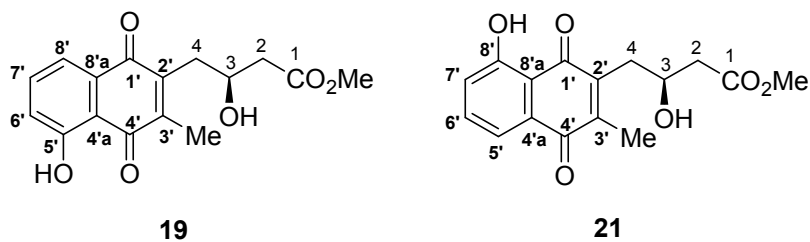

| position <sup>a</sup> | 19 derived from natural 7 <sup>b</sup> |                                              | position <sup>a</sup> | 21         |                                              | $\Delta\delta_C$ (ppm) | $\Delta\delta_H$ (ppm) |
|-----------------------|----------------------------------------|----------------------------------------------|-----------------------|------------|----------------------------------------------|------------------------|------------------------|
|                       | $\delta_C$                             | $\delta_H$ (J in Hz)                         |                       | $\delta_C$ | $\delta_H$ (J in Hz)                         |                        |                        |
| 1                     | 172.6                                  |                                              | 1                     | 172.9      | —                                            | -0.3                   |                        |
| 2                     | 41.2                                   | 2.58, dd (15.5, 7.5)<br>2.63, dd (15.5, 5.5) | 2                     | 41.1       | 2.59, dd (16.6, 8.0)<br>2.66, dd (16.6, 4.0) | -0.1                   | -0.01<br>-0.03         |
| 3                     | 67.7                                   | 4.28, m<br>—                                 | 3                     | 67.6       | 4.27, m<br>—                                 | -0.1                   | +0.01                  |
| 4                     | 36.0                                   | 3.09, dd (12.6, 7.5)<br>3.27, dd (12.6, 4.5) | 4                     | 34.0       | 2.89, m, 2H                                  | +2.0                   | +0.20<br>+0.38         |
| 1'                    | 182.0                                  |                                              | 4'                    | 184.2      |                                              | -2.2                   |                        |
| 2' or 3'              | 147.9                                  |                                              | 3' or 2'              | 142.9      |                                              | +5.0                   |                        |
| 3' or 2'              | 149.2                                  |                                              | 2' or 3'              | 147.2      |                                              | +2.0                   |                        |
| 3'-Me                 | 18.4                                   | 2.65, s                                      | 3'-Me                 | 13.5       | 2.25                                         | +4.9                   | +0.40                  |
| 4'                    | 186.3                                  |                                              | 1'                    | 190.3      |                                              | -4.0                   |                        |
| 4'a                   | 115.4                                  |                                              | 8'a                   | 114.8      |                                              | +0.6                   |                        |
| 5'                    | 161.6                                  |                                              | 8'                    | 161.2      |                                              | +0.4                   |                        |
| 6'                    | 124.0                                  | 7.25, dd (8.0, 2.0)                          | 7'                    | 123.9      | 7.22, dd (8.0, 1.6)                          | -0.1                   | +0.03                  |
| 7'                    | 136.3                                  | 7.63, dd (8.0, 7.8)                          | 6'                    | 136.1      | 7.59, dd (8.0, 7.5)                          | +0.2                   | +0.04                  |
| 8'                    | 119.5                                  | 7.61, dd (7.8, 2.0)                          | 5'                    | 119.1      | 7.61, dd (7.5, 1.6)                          | +0.4                   | 0                      |
| 8'a                   | 131.8                                  |                                              | 4'a                   | 132.0      |                                              | -0.2                   |                        |
| OMe                   | 51.8                                   | 3.72, s                                      | 51.9                  | 3.73, s    |                                              | -0.1                   | -0.01                  |
| OH                    |                                        | 11.9                                         |                       | 12.11      |                                              |                        | -0.21                  |

<sup>a</sup>Carbon atoms have been labeled using the IUPAC numbering system.

<sup>b</sup><sup>1</sup>H NMR (200 MHz, CDCl<sub>3</sub>) and <sup>13</sup>C NMR (50.3 MHz, CDCl<sub>3</sub>).<sup>S1</sup>

<sup>c</sup><sup>1</sup>H NMR (400 MHz, CDCl<sub>3</sub>, TMS) and <sup>13</sup>C NMR (100 MHz, CDCl<sub>3</sub>).

**Figure S1.**  $^1\text{H}$  NMR spectrum (400 MHz,  $\text{CDCl}_3$ , TMS) of compound **17**.

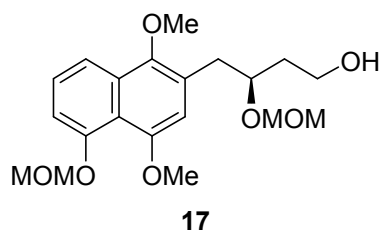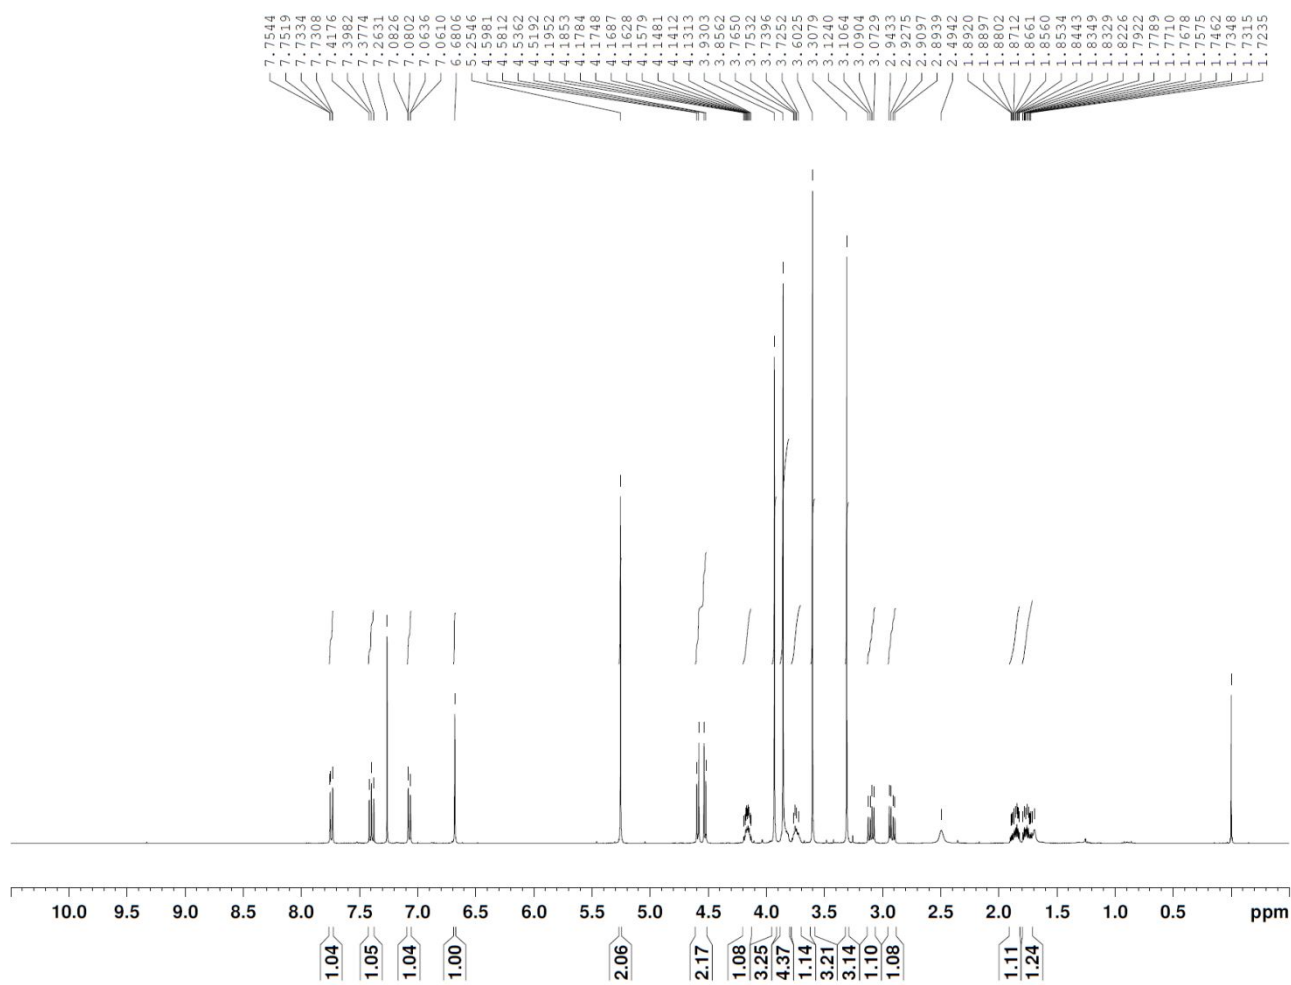

**Figure S2.**  $^{13}\text{C}\{^1\text{H}\}$  NMR spectrum (100 MHz,  $\text{CDCl}_3$ ) of compound **17**.

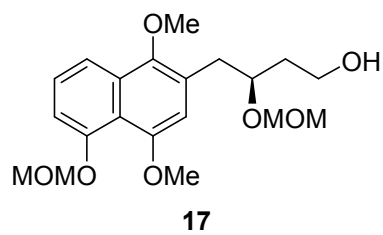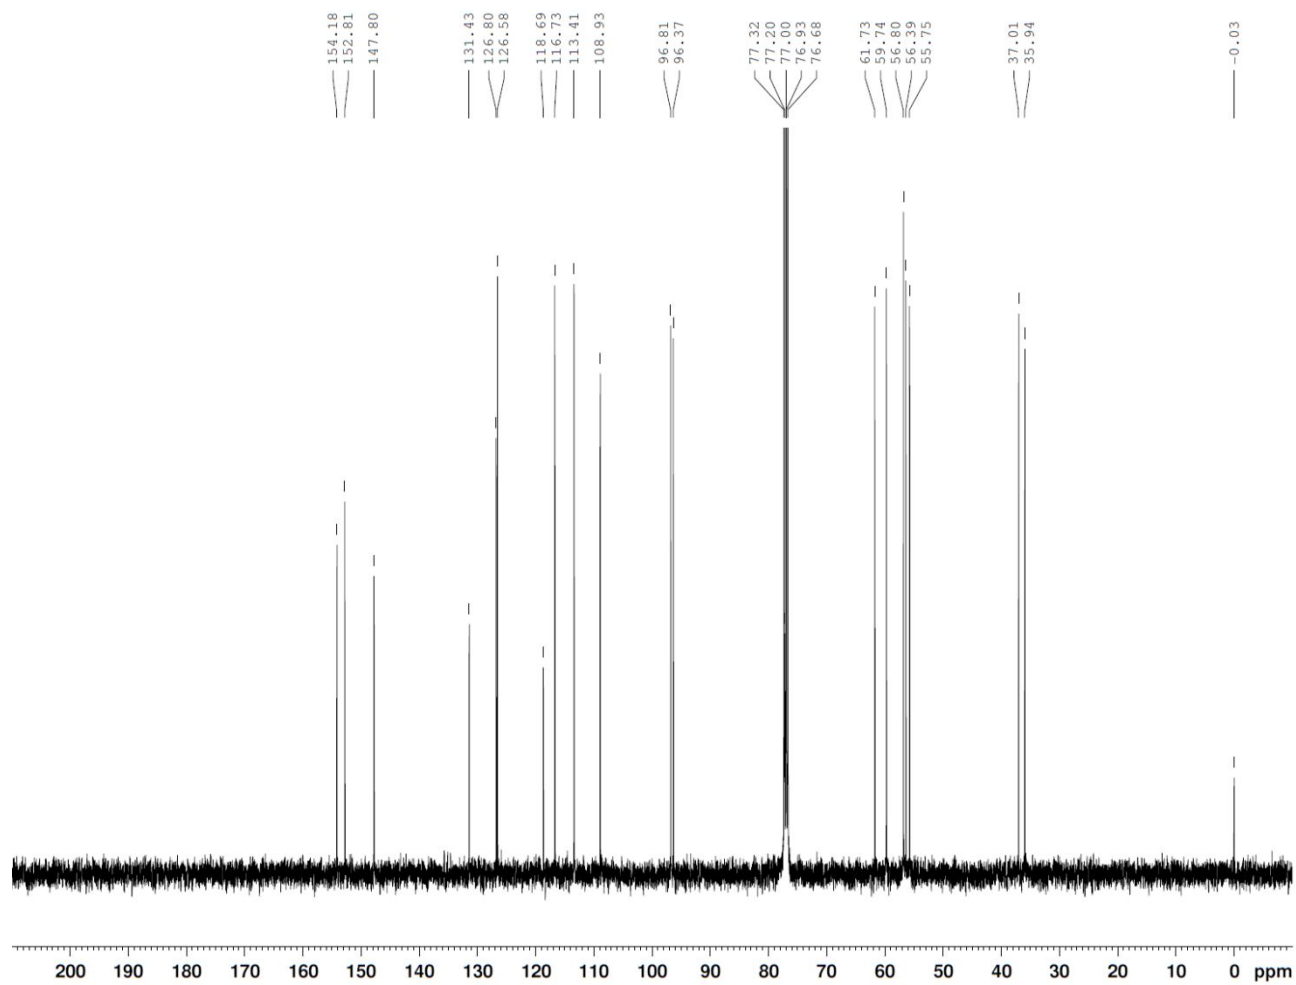

**Figure S3.**  $^1\text{H}$  NMR spectrum (400 MHz,  $\text{CDCl}_3$ , TMS) of compound **10**.

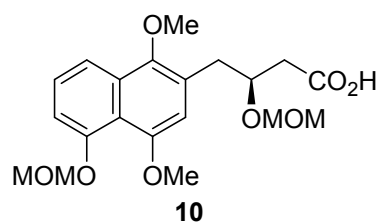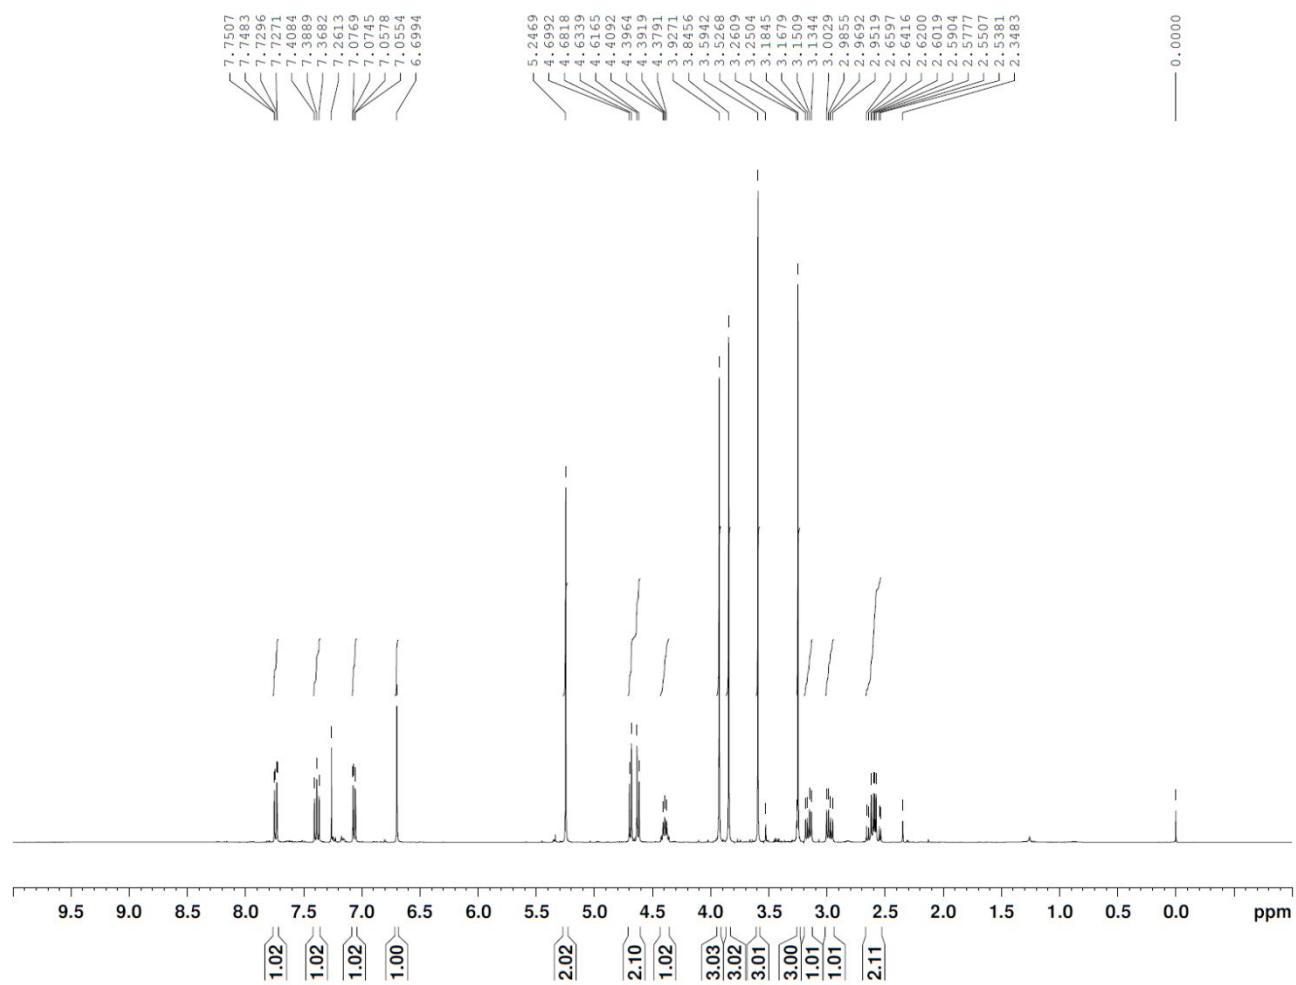



**Figure S4.**  $^{13}\text{C}\{^1\text{H}\}$  NMR spectrum (100 MHz,  $\text{CDCl}_3$ ) of compound **10**.

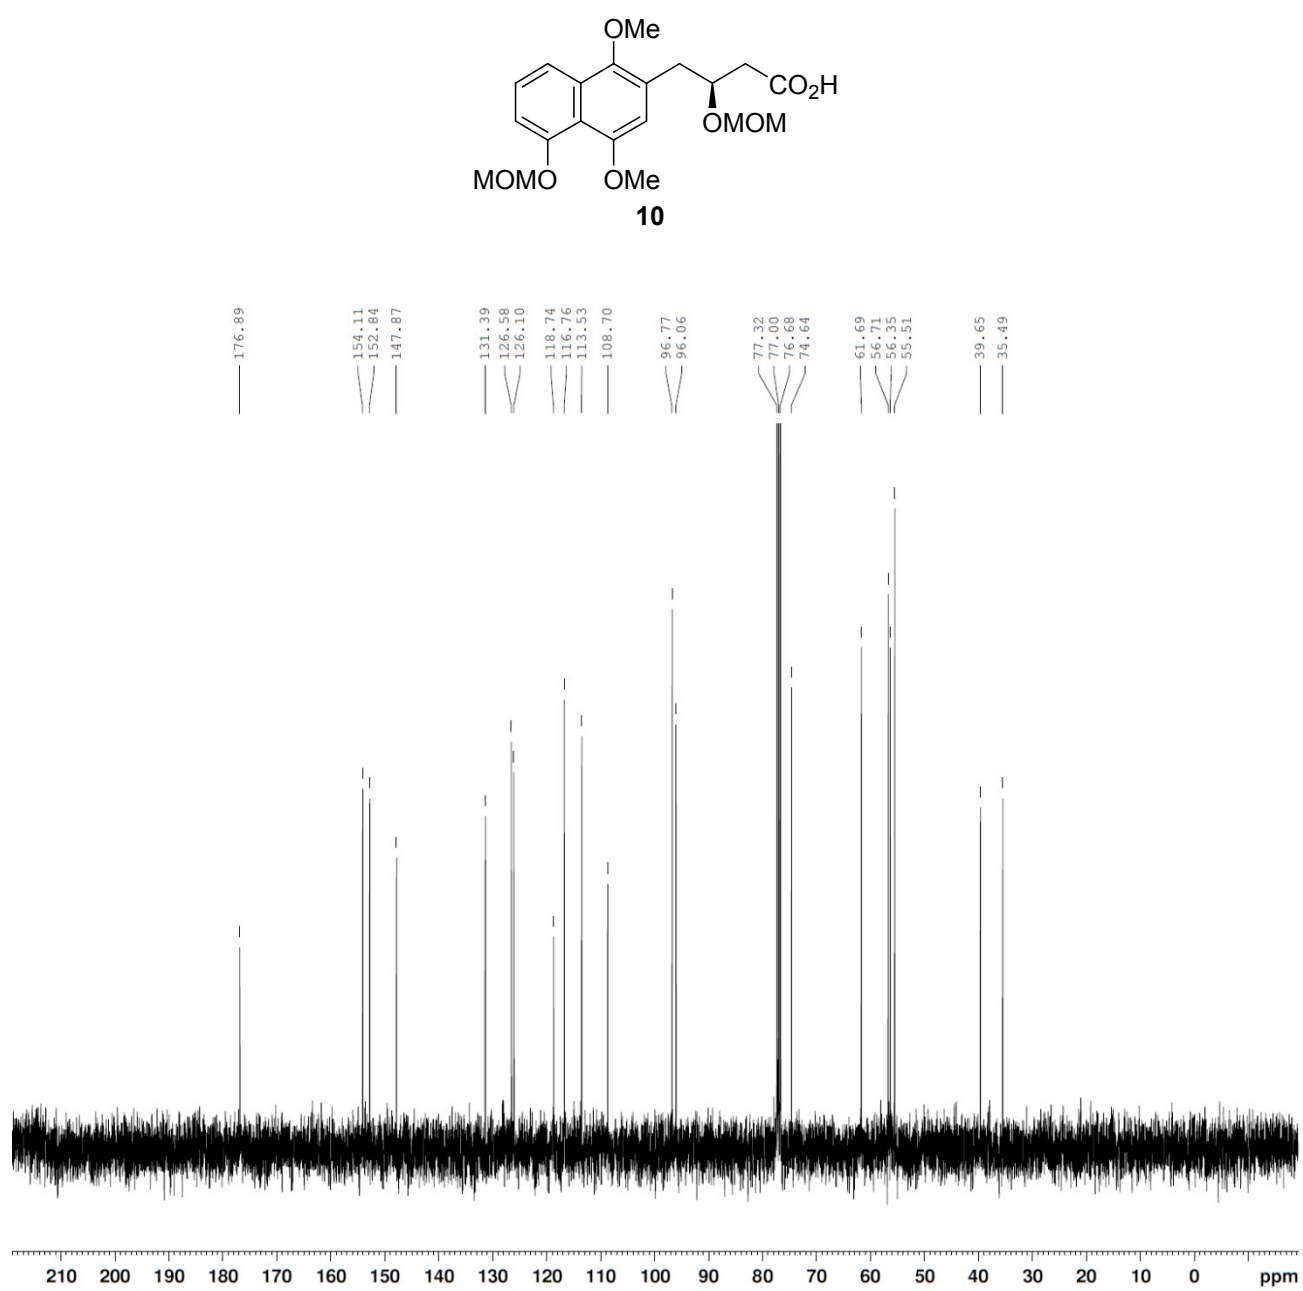

**Figure S5.**  $^1\text{H}$  NMR spectrum (400 MHz,  $\text{CDCl}_3$ , TMS) of compound **11**.

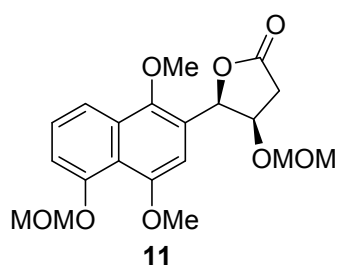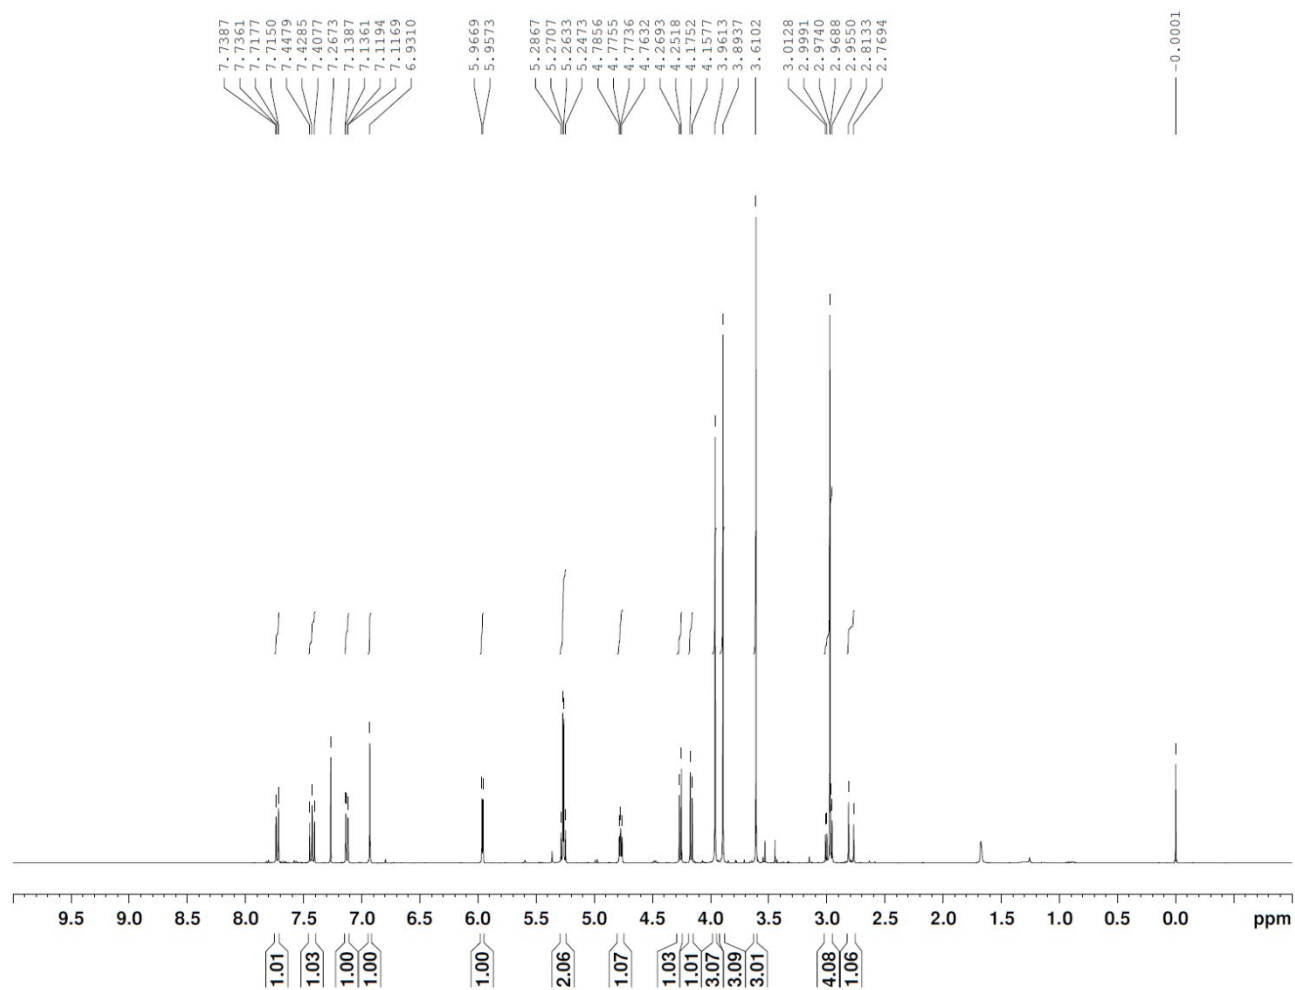

**Figure S6.**  $^{13}\text{C}\{^1\text{H}\}$  NMR spectrum (100 MHz,  $\text{CDCl}_3$ ) of compound **11**.

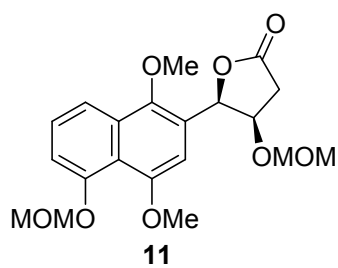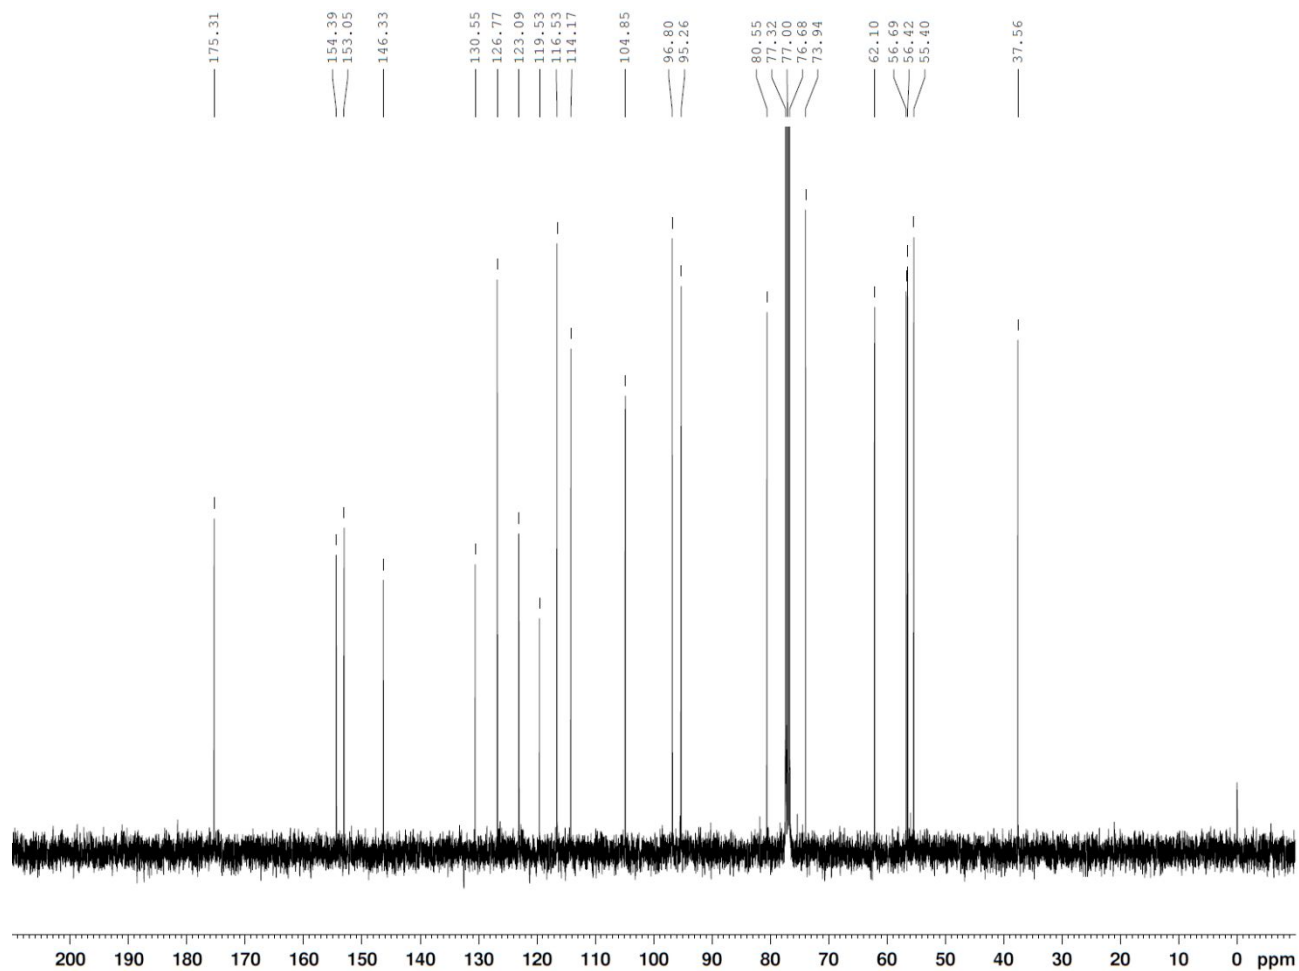

Figure S7. <sup>1</sup>H NMR spectrum (400 MHz, CDCl<sub>3</sub>, TMS) of compound **12**.

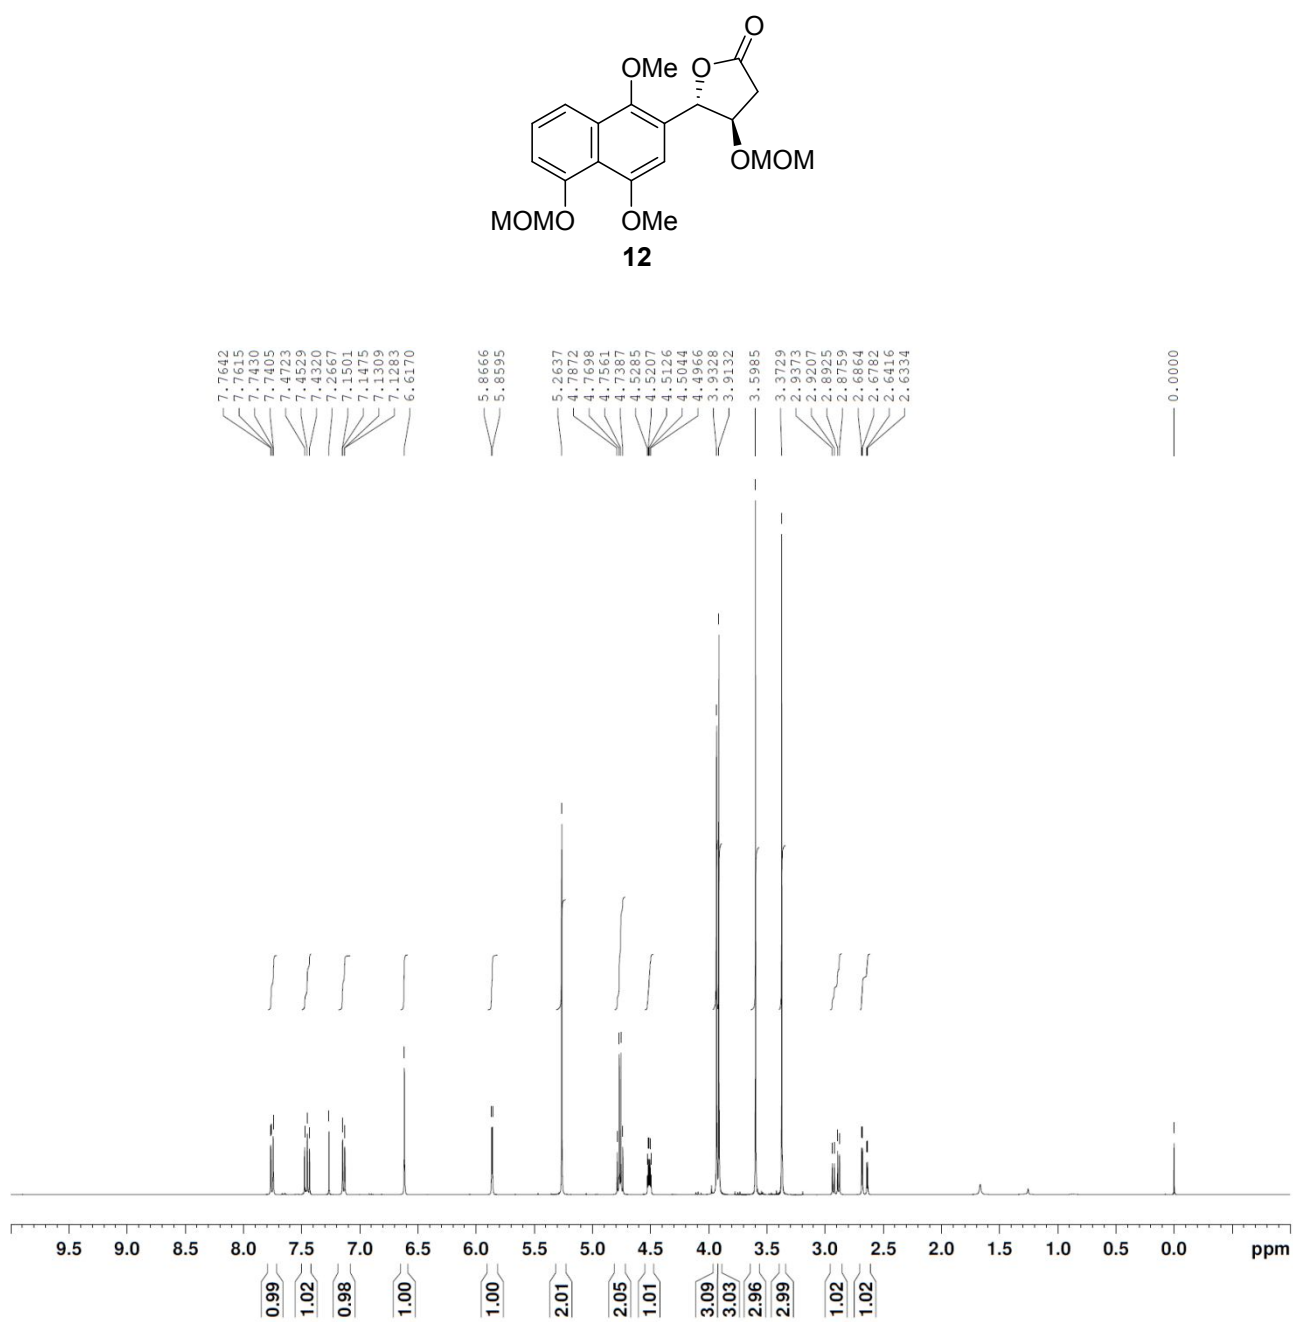

**Figure S8.**  $^{13}\text{C}\{^1\text{H}\}$  NMR spectrum (100 MHz,  $\text{CDCl}_3$ ) of compound **12**.

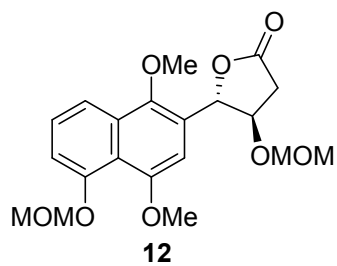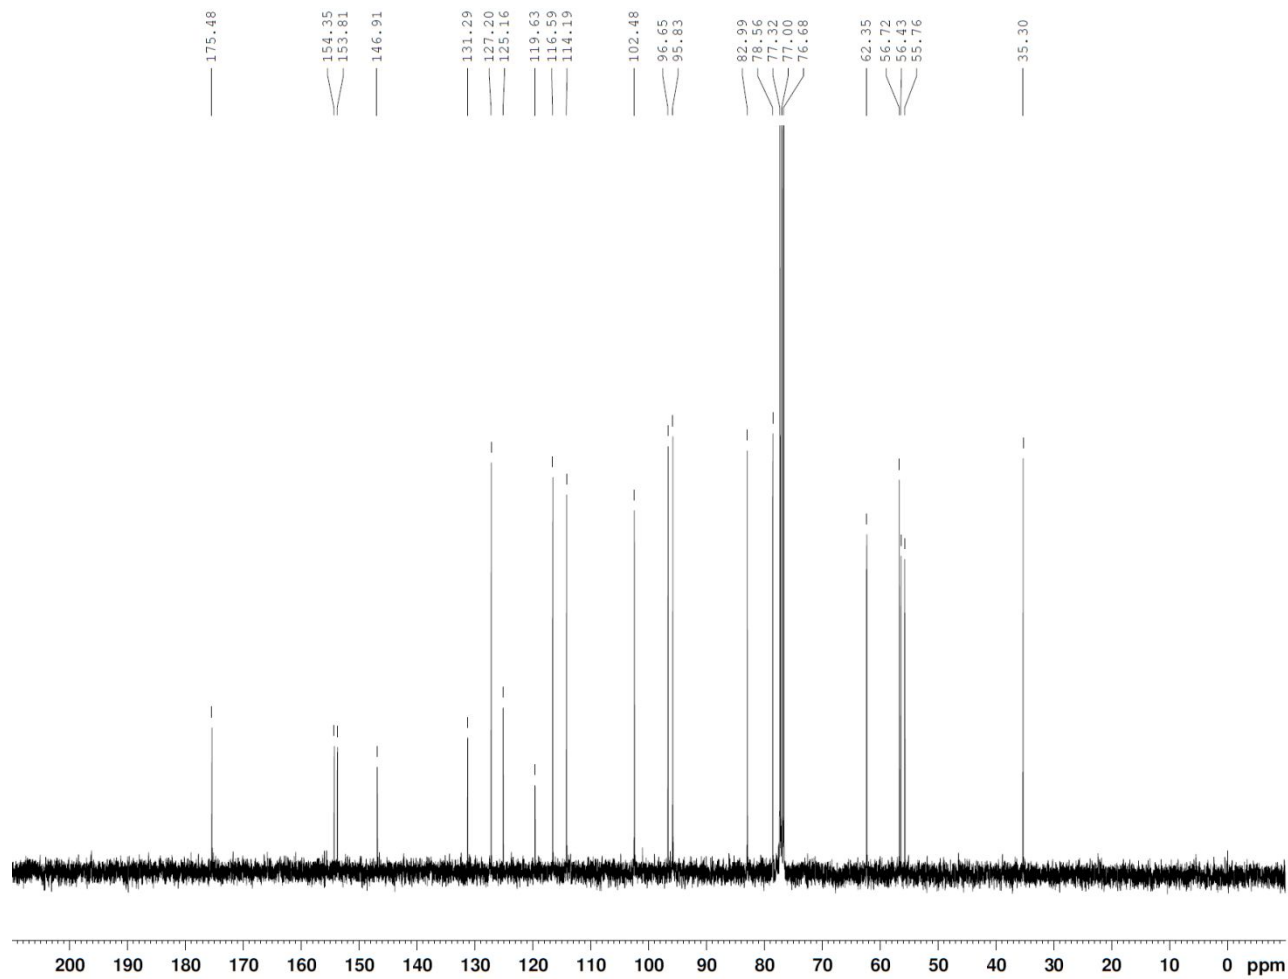

Figure S9. <sup>1</sup>H NMR spectrum (400 MHz, acetone-d<sub>6</sub>) of compound 1.

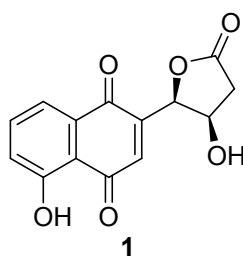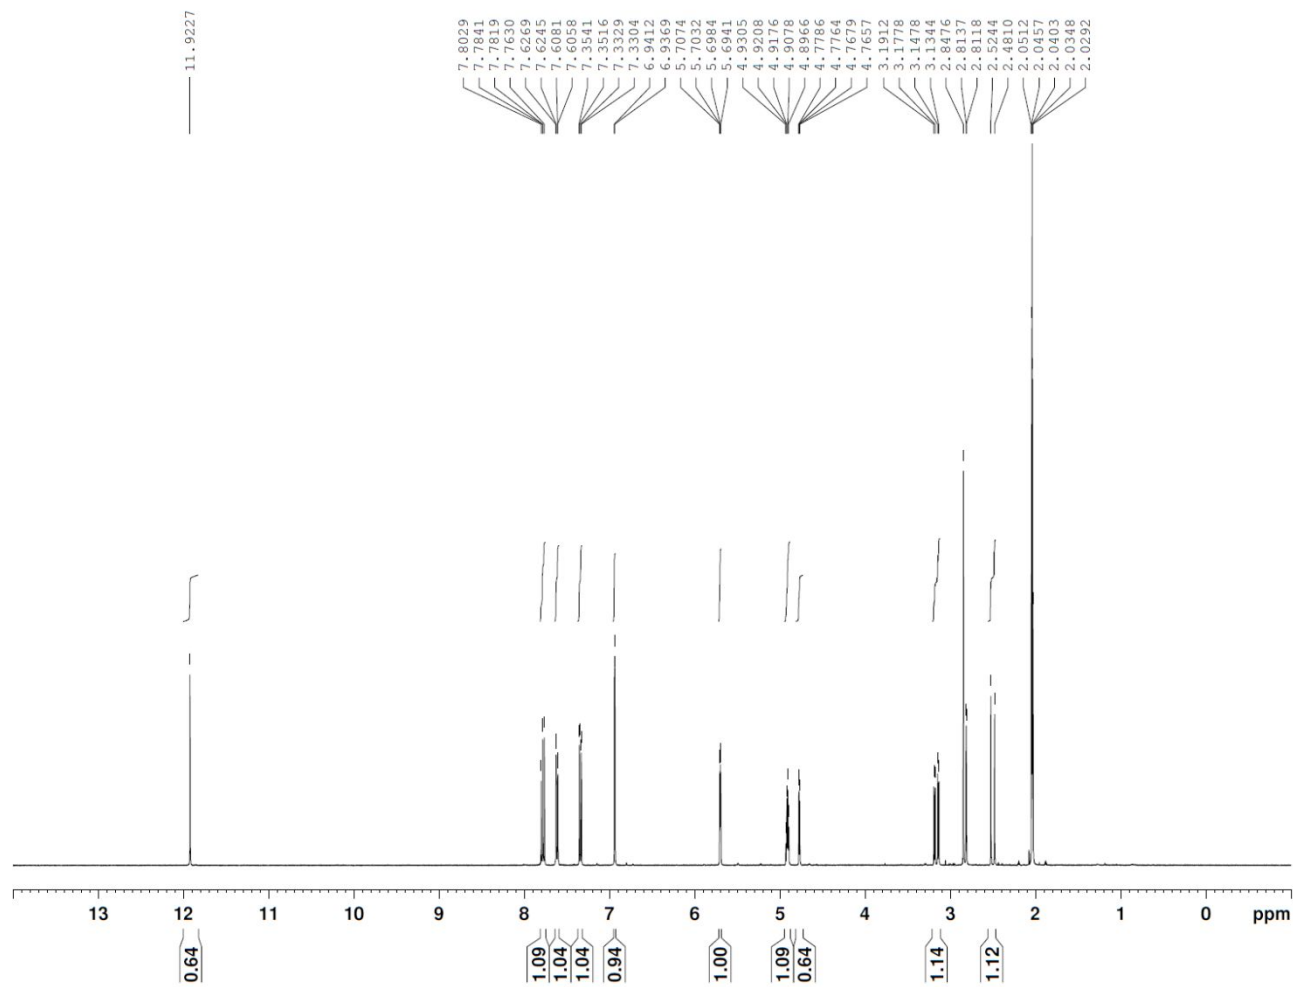

**Figure S10.**  $^{13}\text{C}\{^1\text{H}\}$  NMR spectrum (100 MHz, acetone- $d_6$ ) of compound **1**.

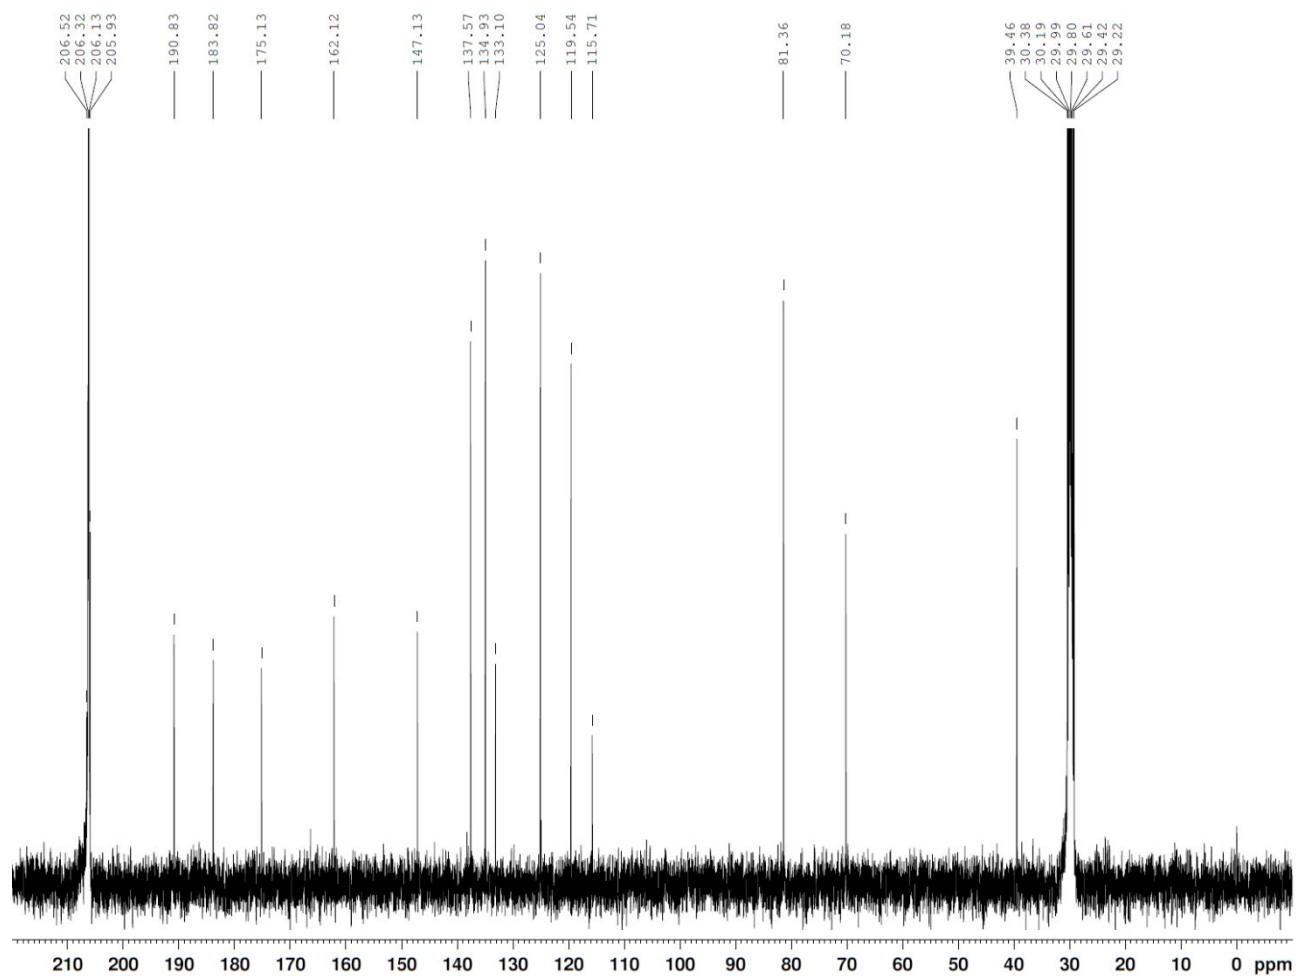

**Figure S11.**  $^1\text{H}$  NMR spectrum (400 MHz, acetone- $d_6$ , TMS) of compound **2**.

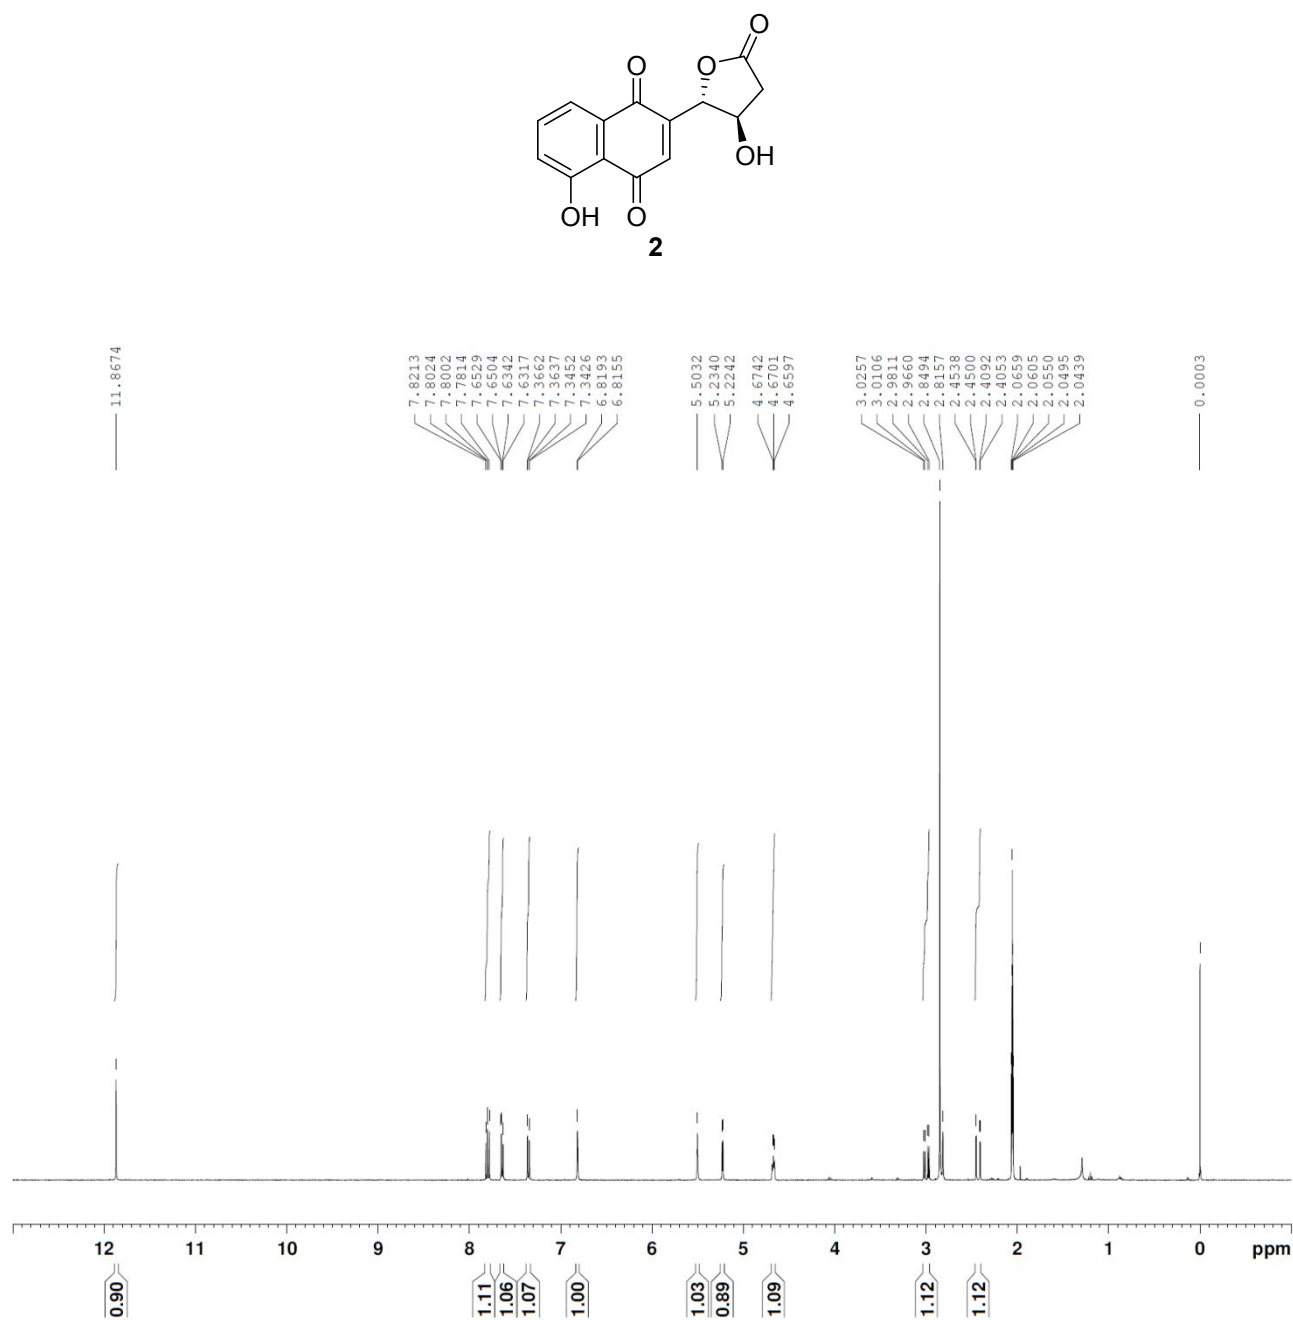



**Figure S12.**  $^{13}\text{C}\{^1\text{H}\}$  NMR spectrum (100 MHz, acetone- $d_6$ ) of compound **2**.

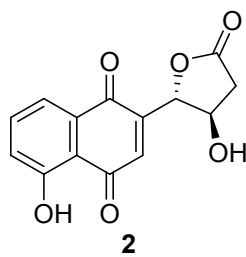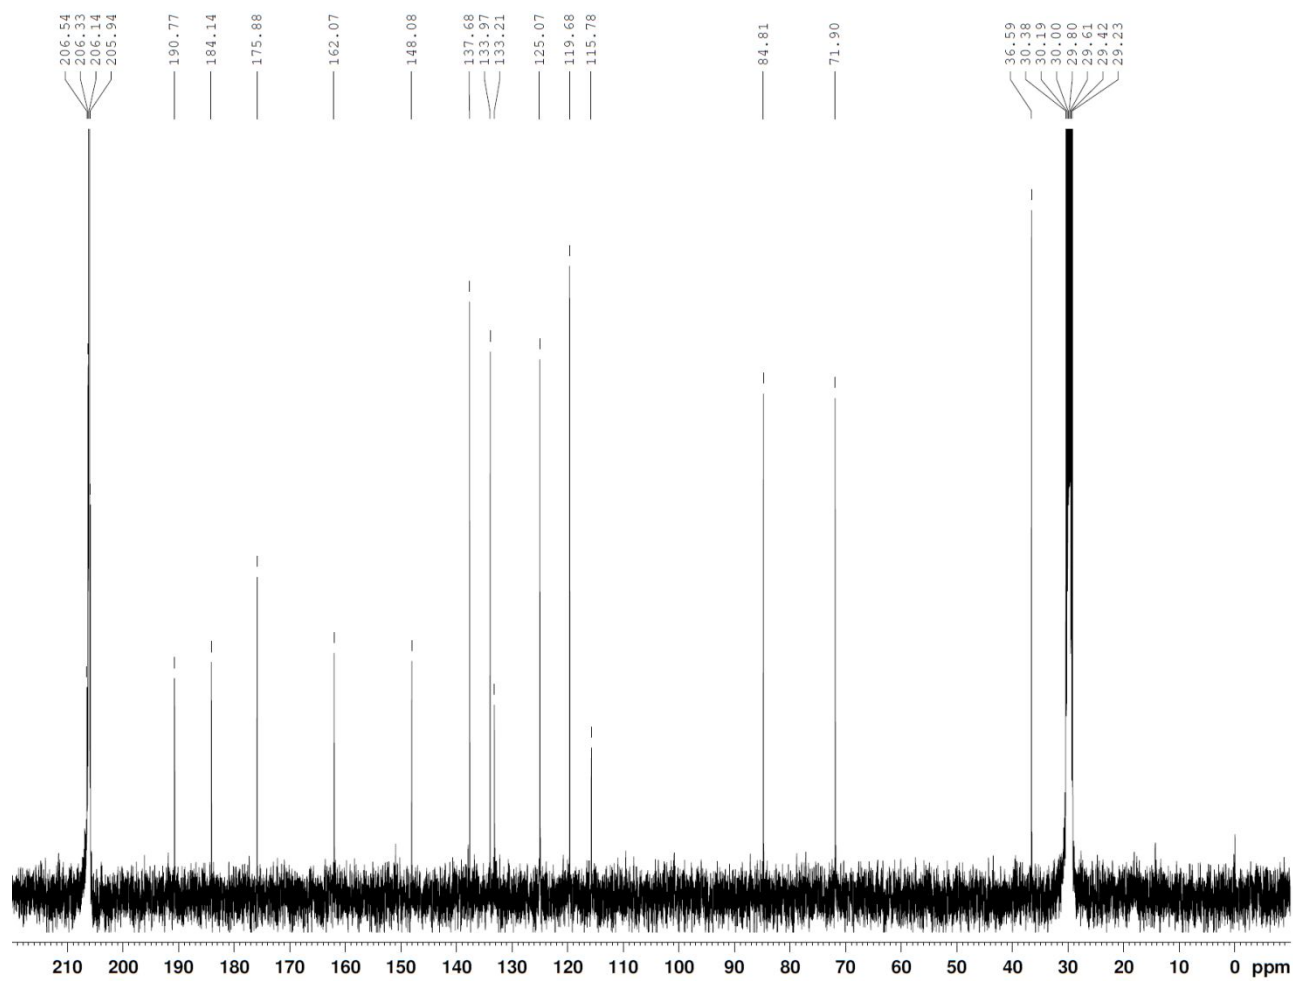

**Figure S13.**  $^1\text{H}$  NMR spectrum (400 MHz,  $\text{CD}_2\text{Cl}_2$ ) of compound **8**.

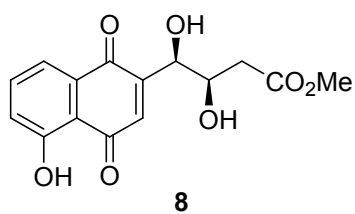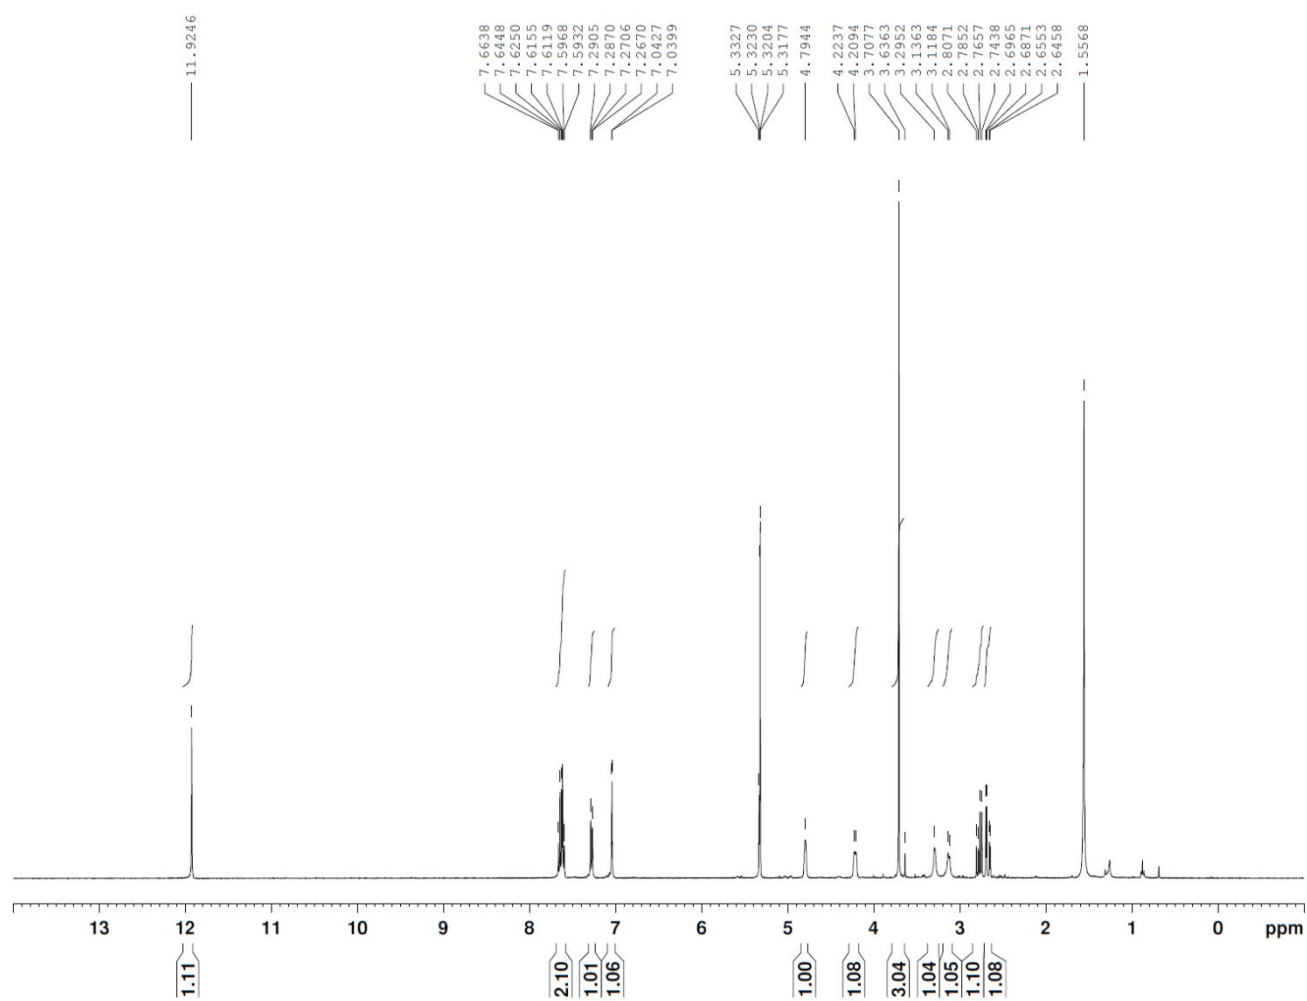

**Figure S14.**  $^{13}\text{C}\{^1\text{H}\}$  NMR spectrum (100 MHz,  $\text{CD}_2\text{Cl}_2$ ) of compound **8**.

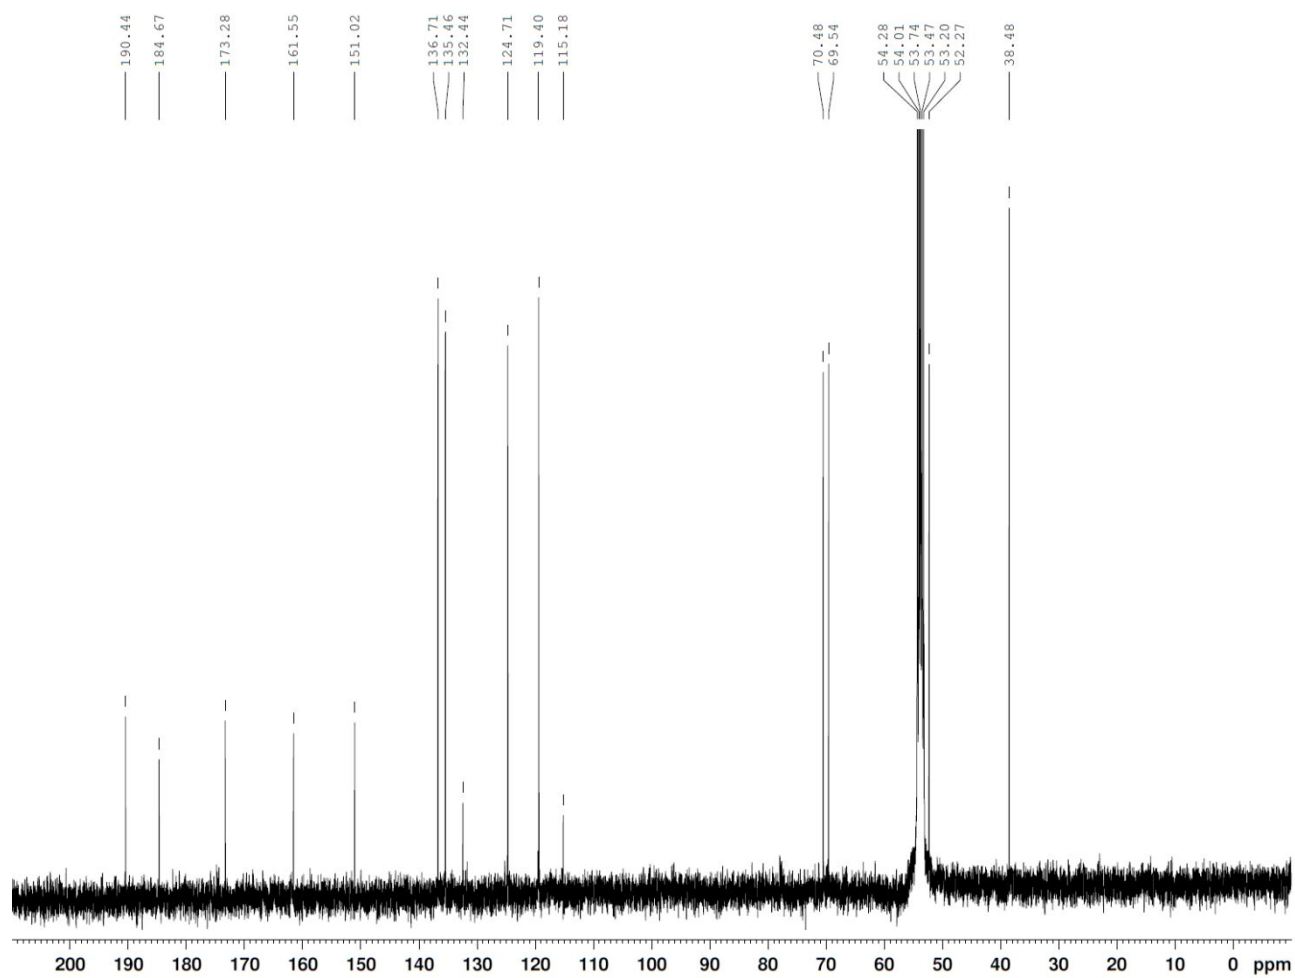

**Figure S15.**  $^1\text{H}$  NMR spectrum (400 MHz,  $\text{CD}_2\text{Cl}_2$ ) of compound **4-*epi*-8**.

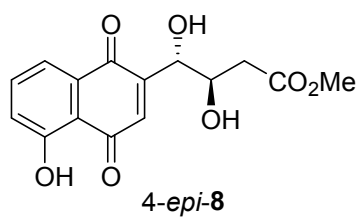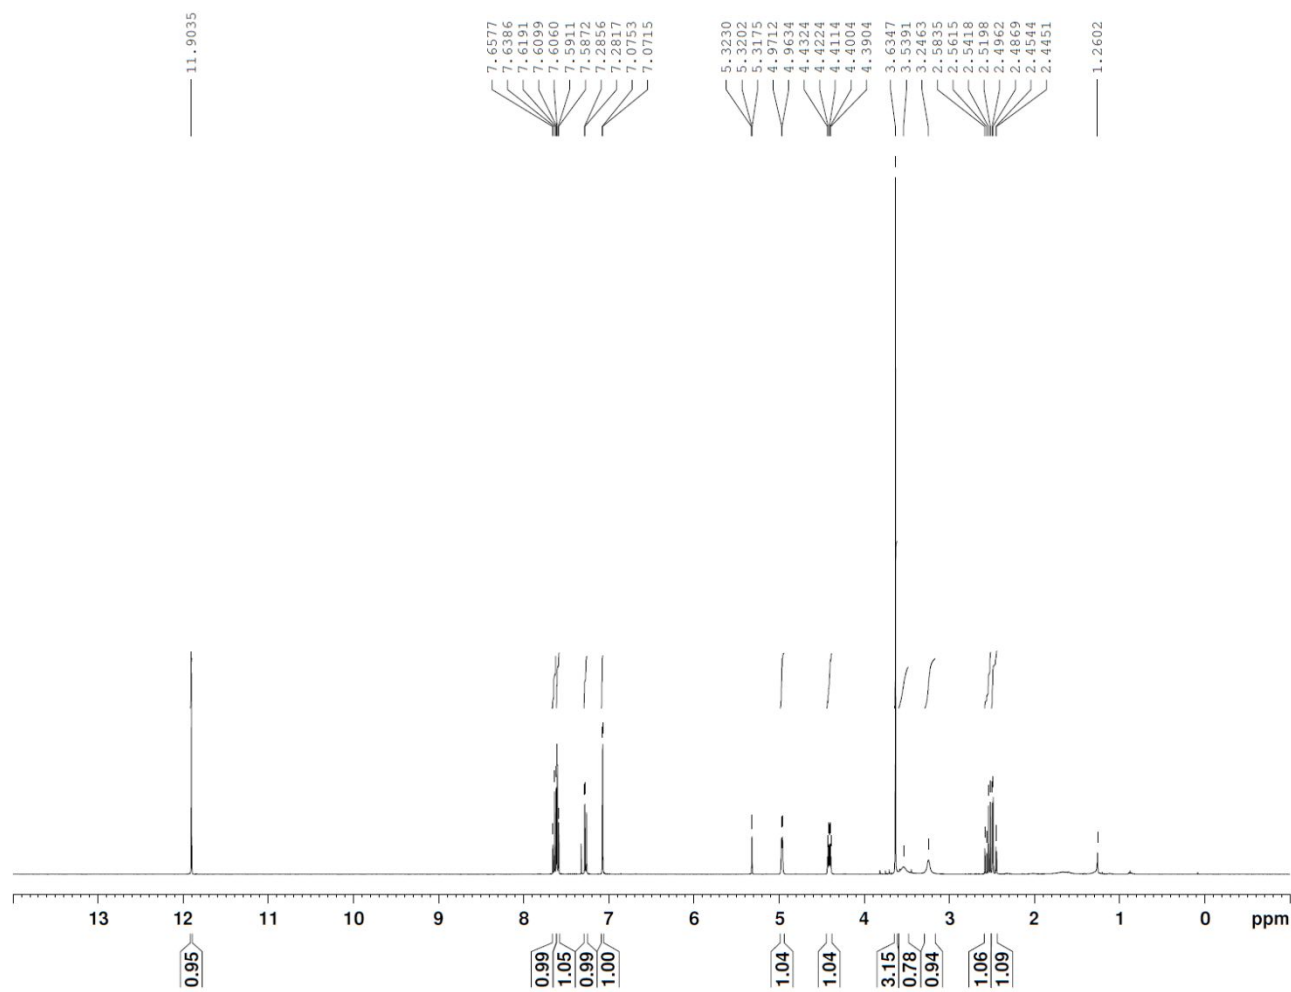

**Figure S16.**  $^{13}\text{C}\{^1\text{H}\}$  NMR spectrum (100 MHz,  $\text{CD}_2\text{Cl}_2$ ) of compound 4-*epi*-8.

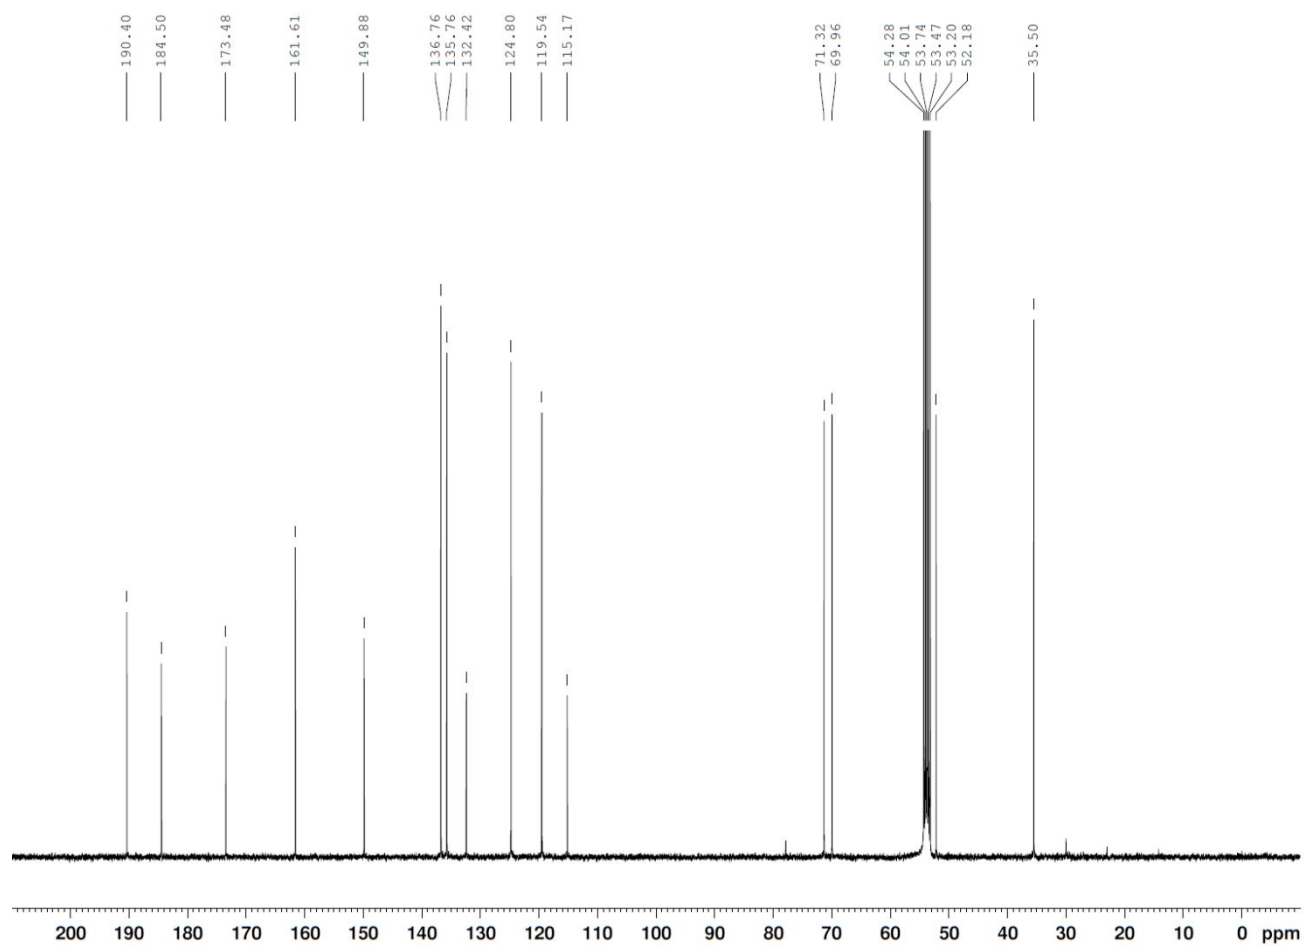

Figure S17. <sup>1</sup>H NMR spectrum (400 MHz, acetone-d<sub>6</sub>, TMS) of compound 3.

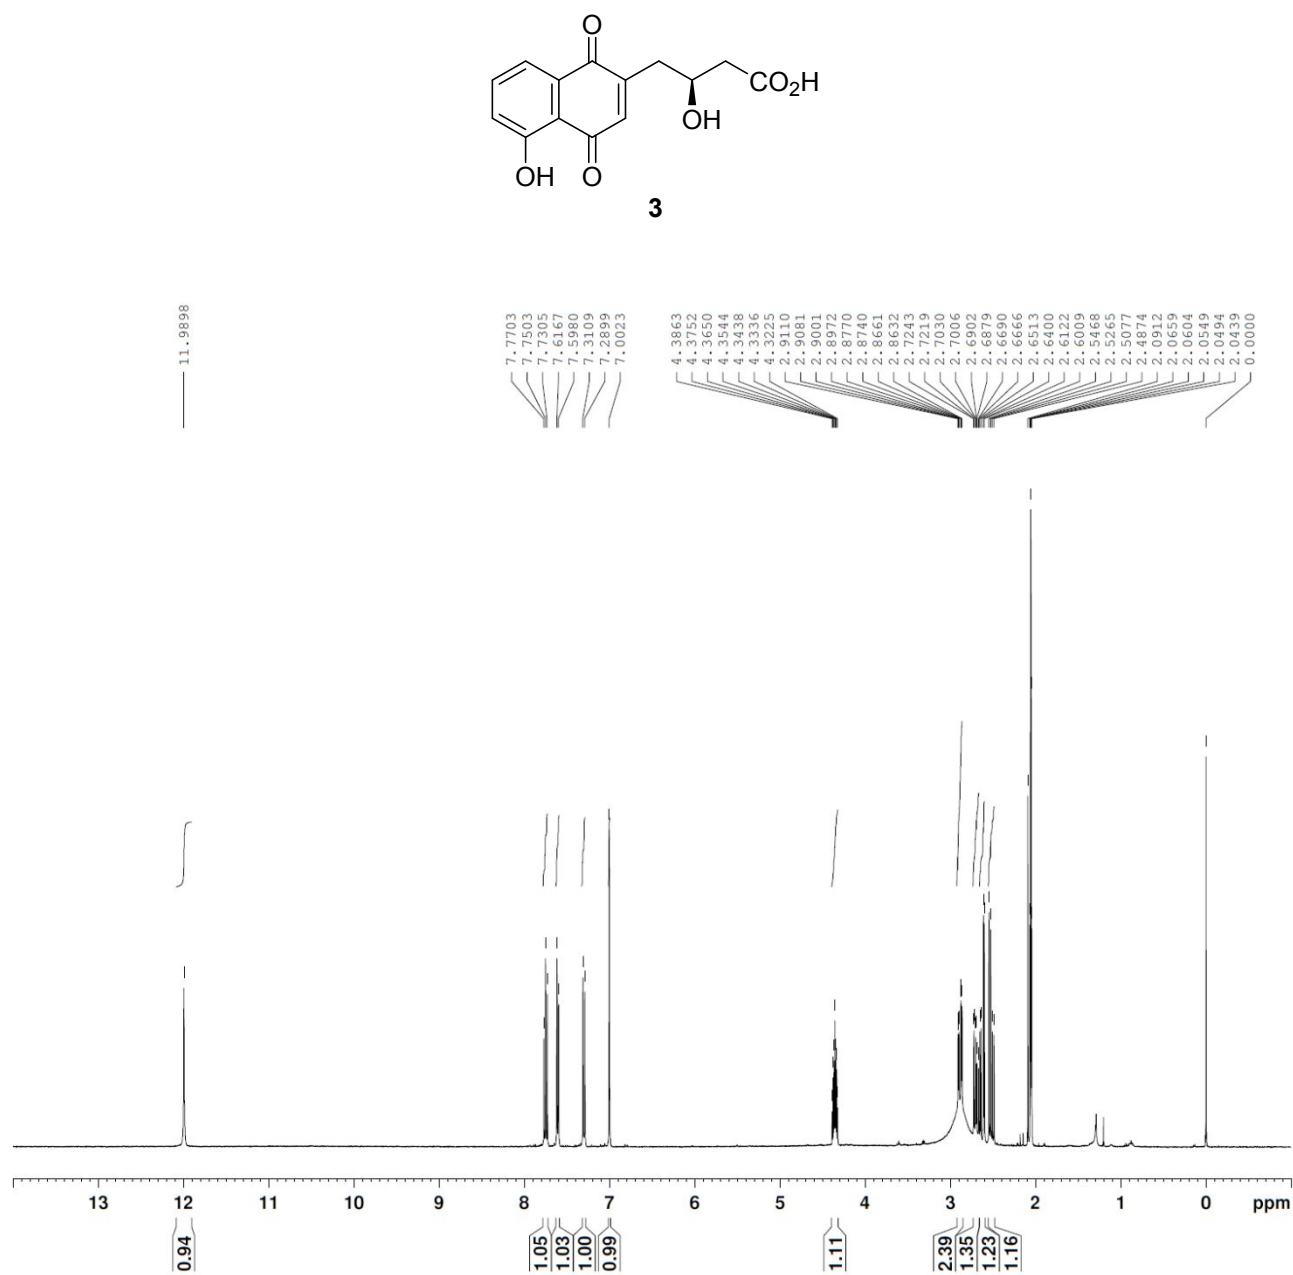

**Figure S18.**  $^{13}\text{C}\{^1\text{H}\}$  NMR spectrum (100 MHz, acetone- $d_6$ ) of compound **3**.

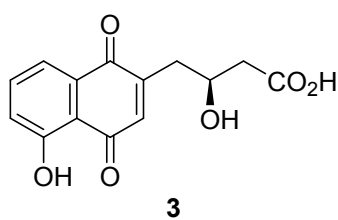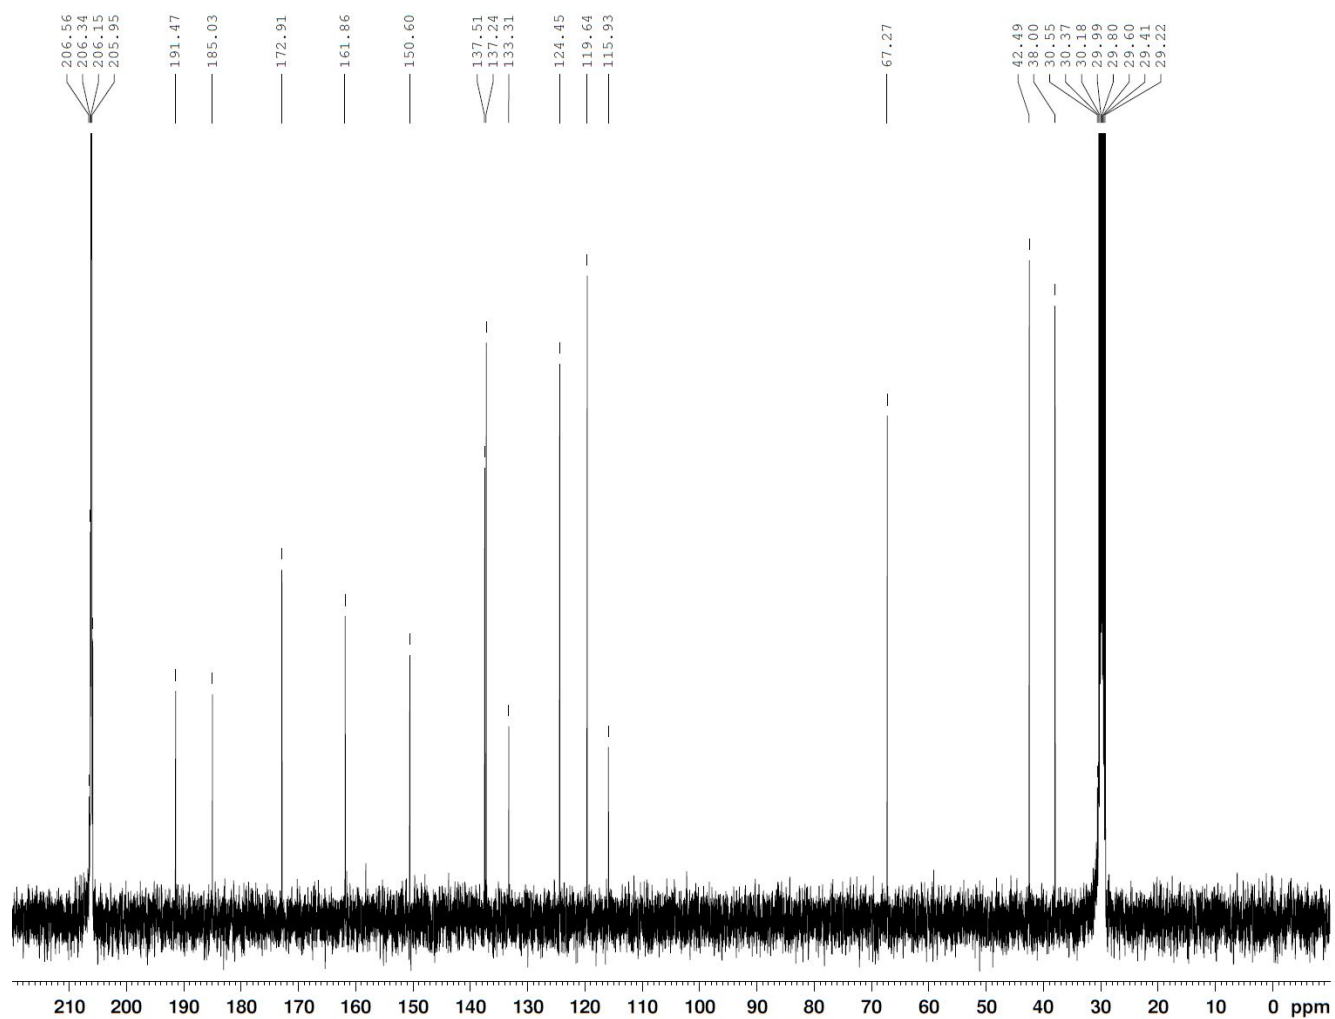

$\text{CO}_2\text{H}$

**Figure S19.**  $^1\text{H}$  NMR spectrum (400 MHz, acetone- $d_6$ ) of compound **6**.

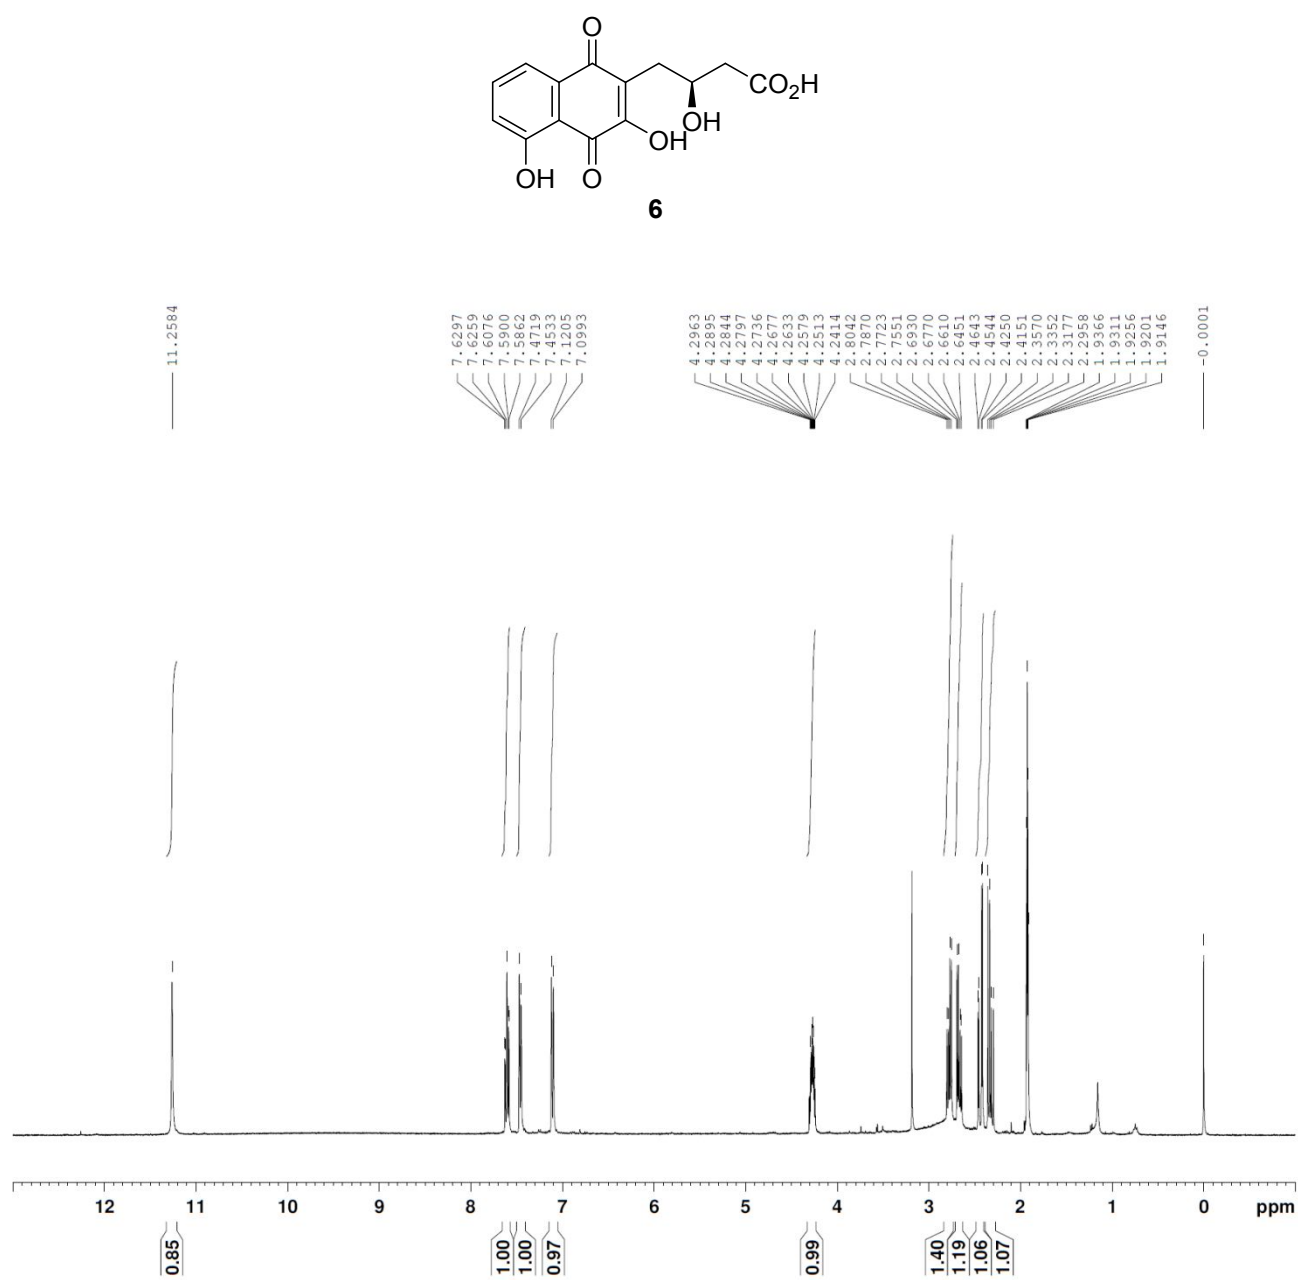



**Figure S20.**  $^{13}\text{C}\{^1\text{H}\}$  NMR spectrum (100 MHz, acetone- $d_6$ ) of compound **6**.

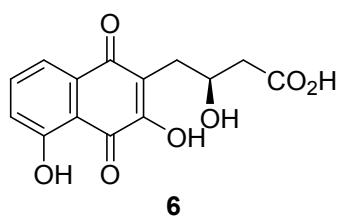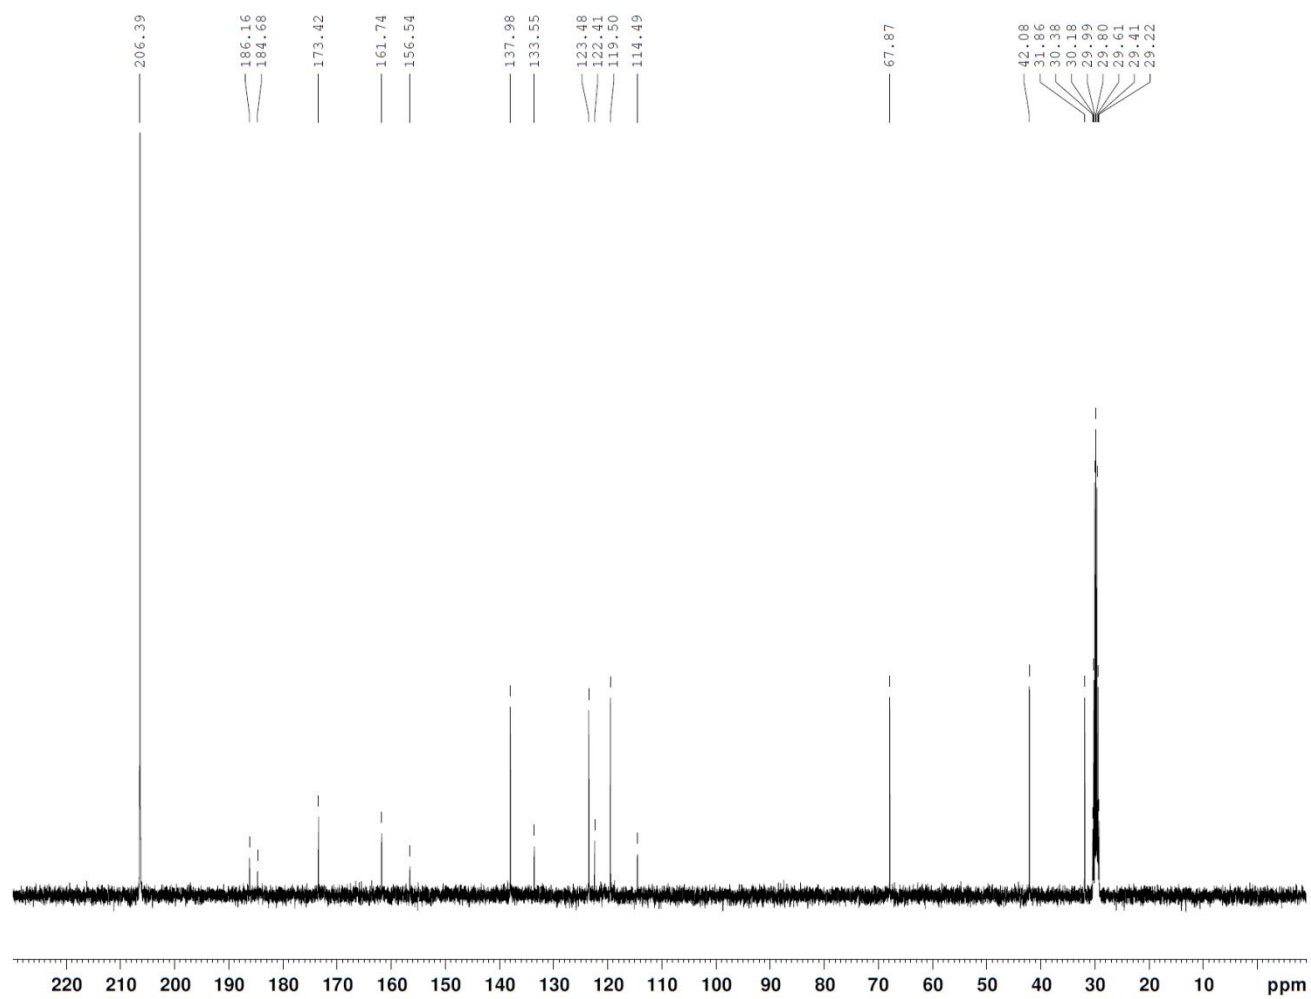

**Figure S21.**  $^1\text{H}$  NMR spectrum (400 MHz,  $\text{CDCl}_3$ , TMS) of compound **15**.

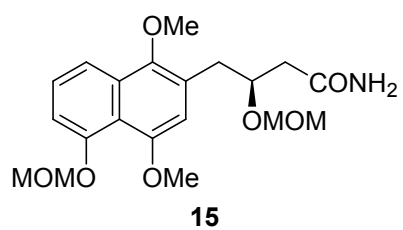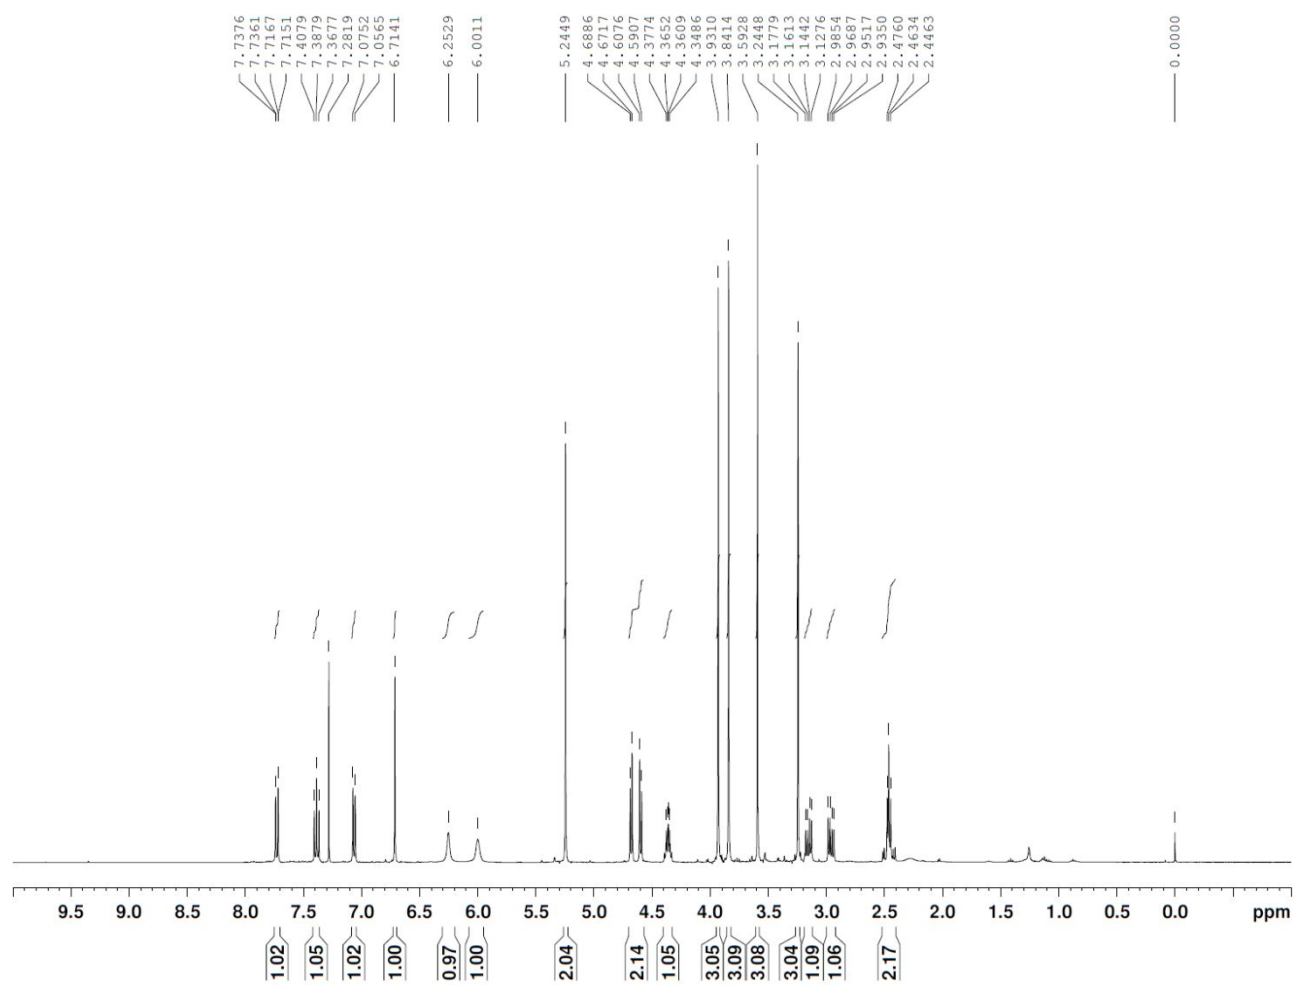

**Figure S22.**  $^{13}\text{C}\{^1\text{H}\}$  NMR spectrum (100 MHz,  $\text{CDCl}_3$ ) of compound **15**.

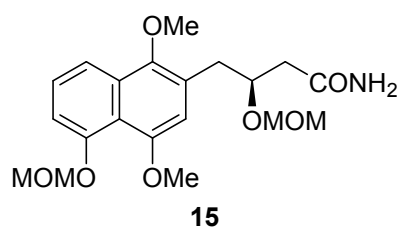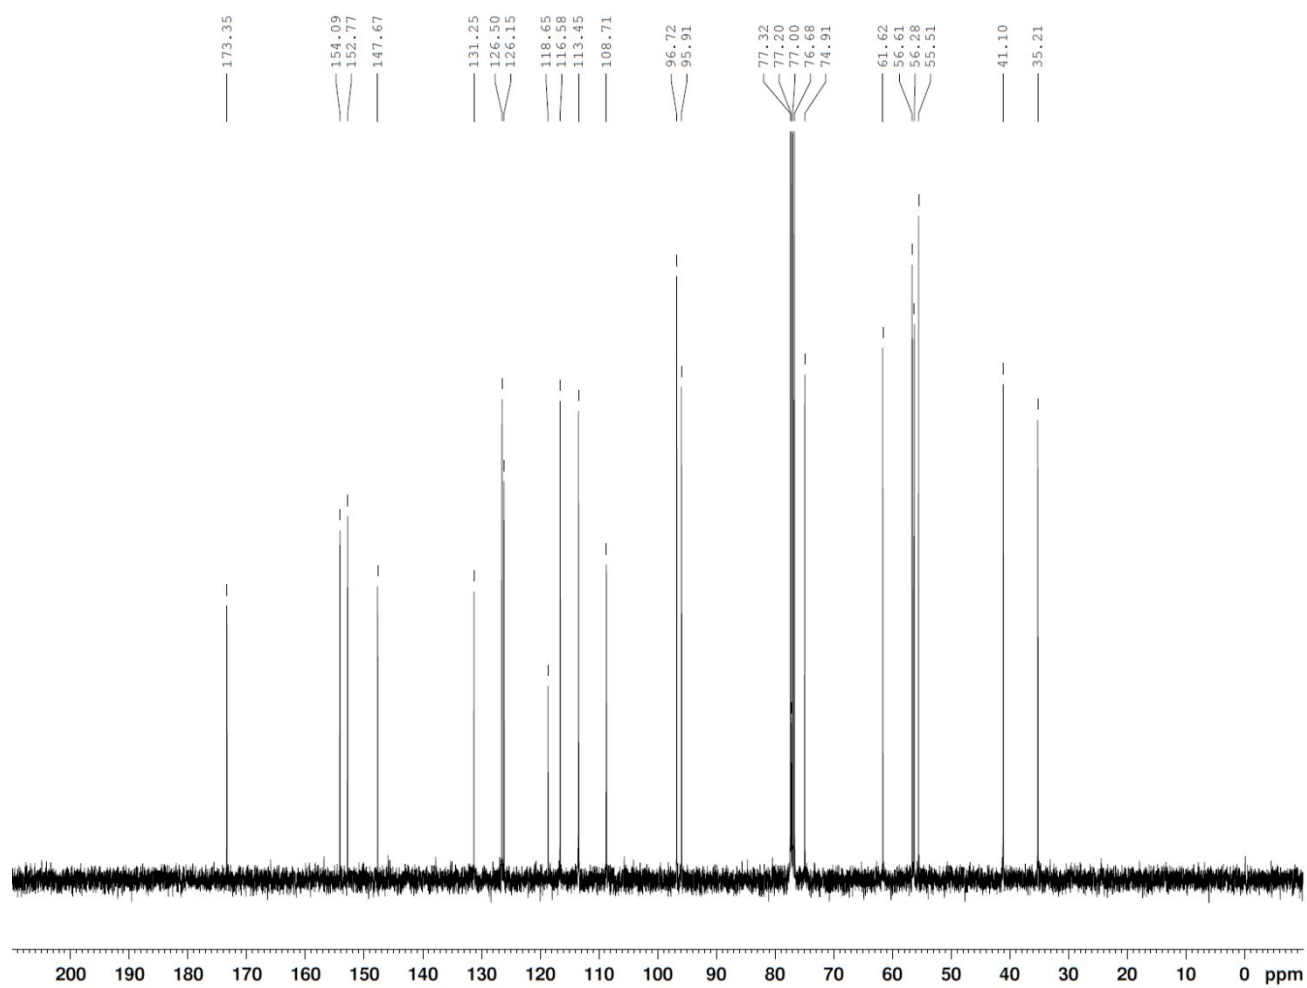

**Figure S23.**  $^1\text{H}$  NMR spectrum (400 MHz,  $\text{CD}_3\text{OD}$ , TMS) of compound **5**.

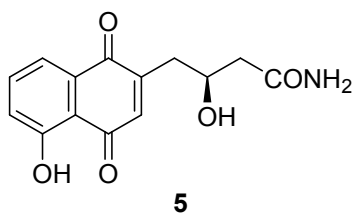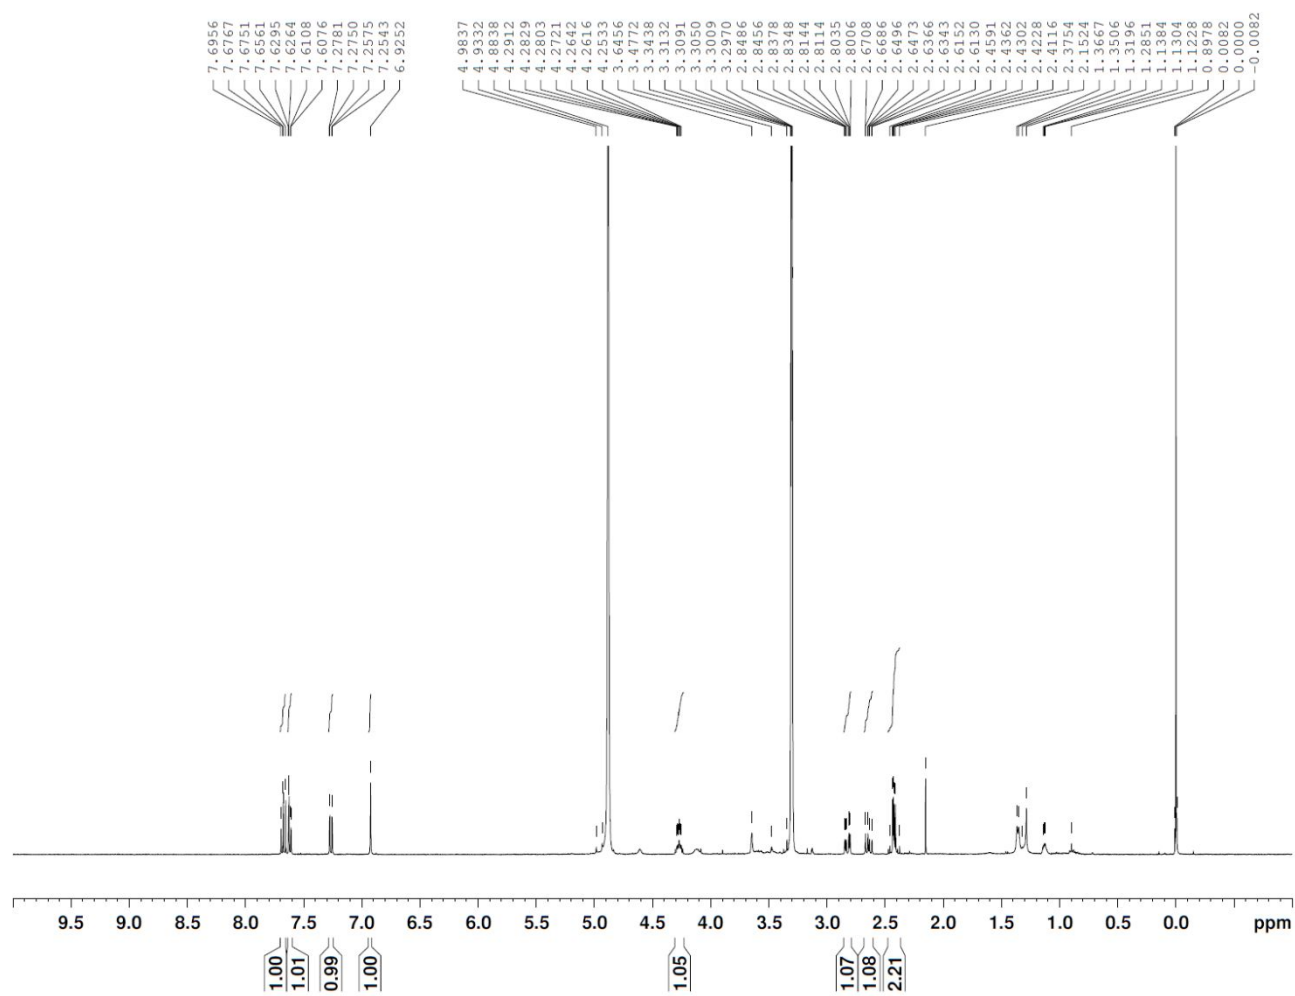

**Figure S24.**  $^{13}\text{C}\{^1\text{H}\}$  NMR spectrum (100 MHz,  $\text{CD}_3\text{OD}$ ) of compound **5**.

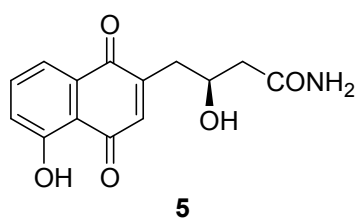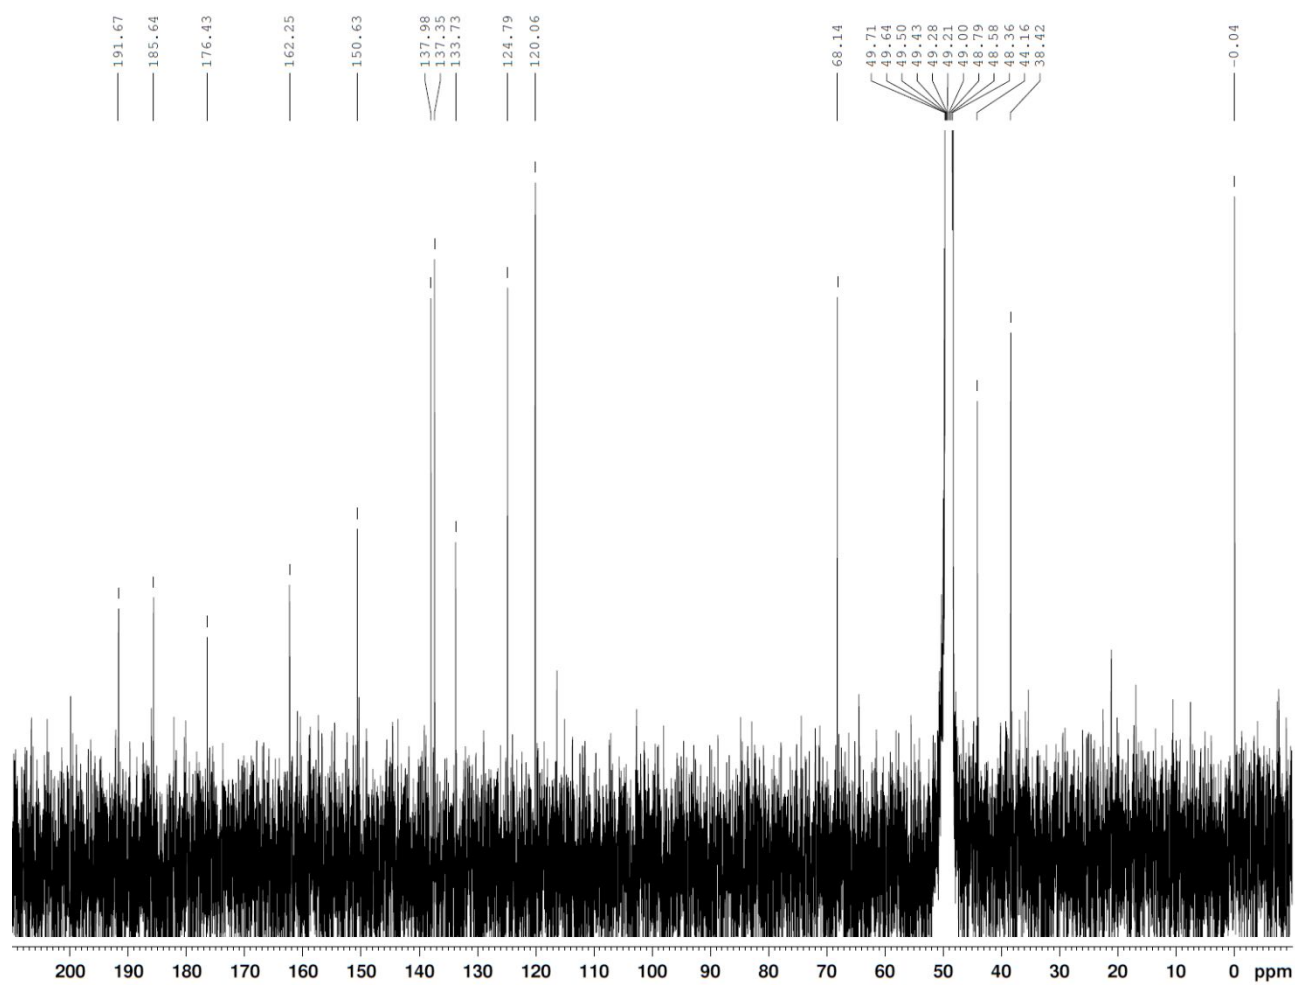

**Figure S25.**  $^1\text{H}$  NMR spectrum (400 MHz,  $\text{CDCl}_3$ , TMS) of compound **16**.

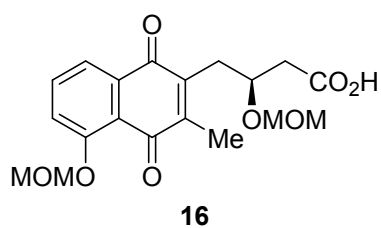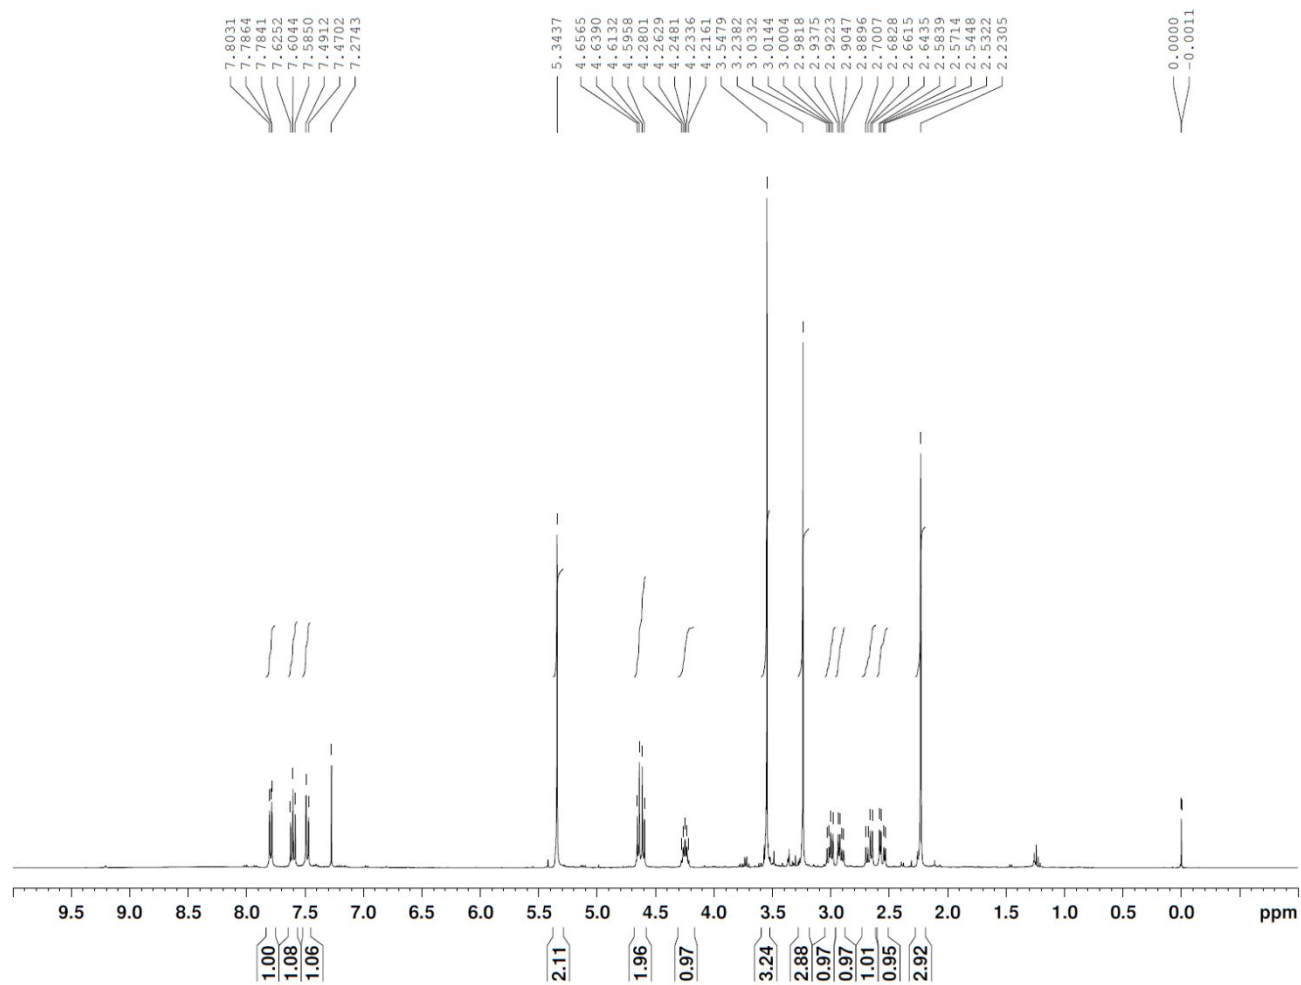

**Figure S26.**  $^{13}\text{C}\{^1\text{H}\}$  NMR spectrum (100 MHz,  $\text{CDCl}_3$ ) of compound **16**.

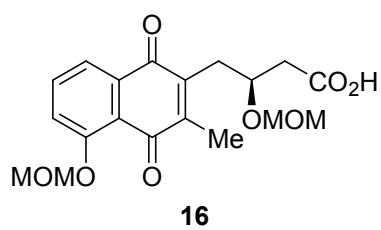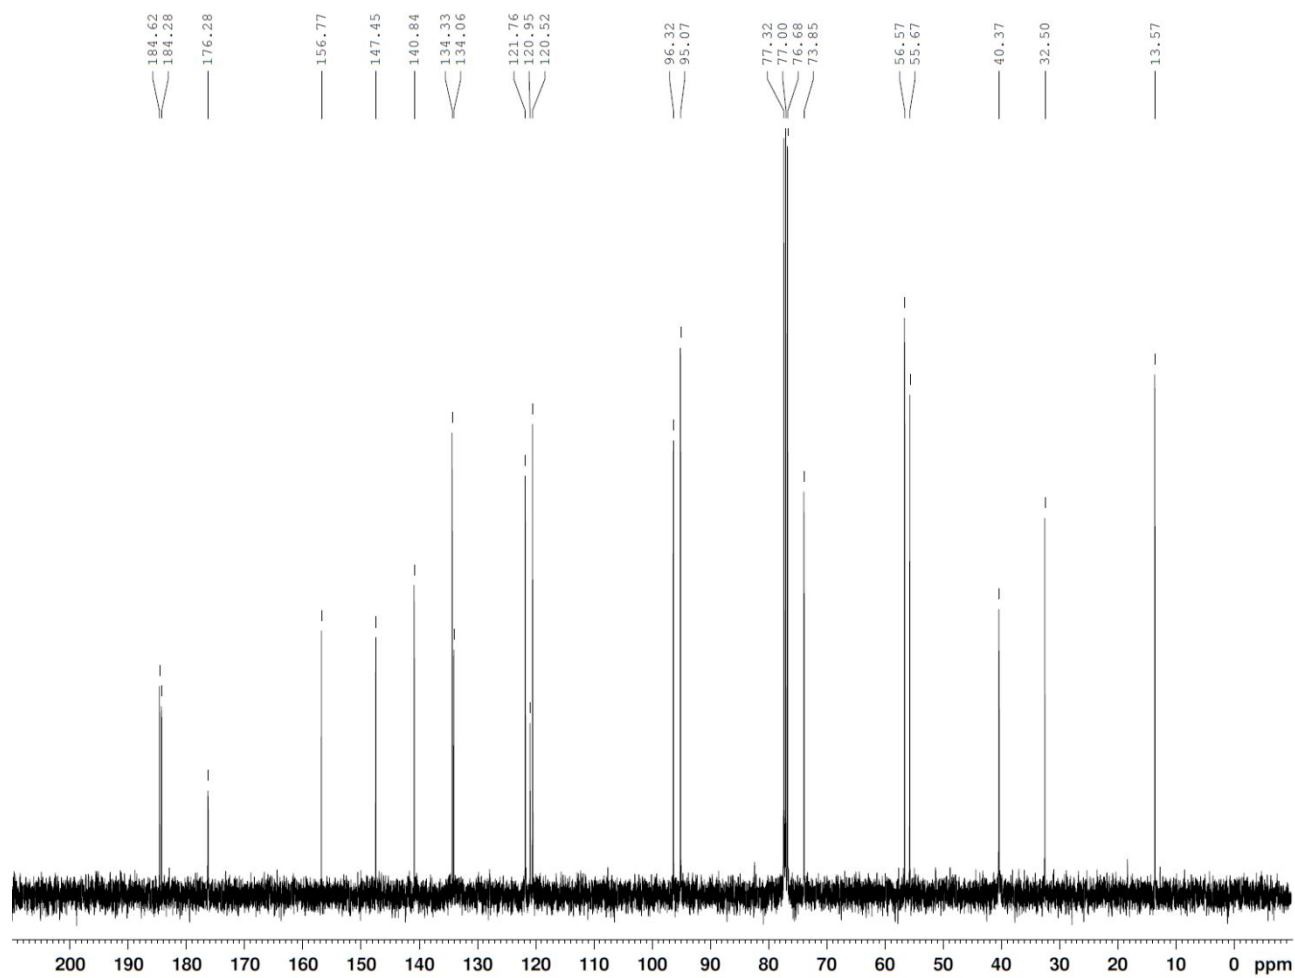

**Figure S27.**  $^1\text{H}$  NMR spectrum (400 MHz,  $\text{CDCl}_3/\text{CD}_3\text{OD} = 9/1$ , TMS) of compound **7**.

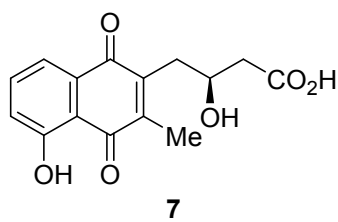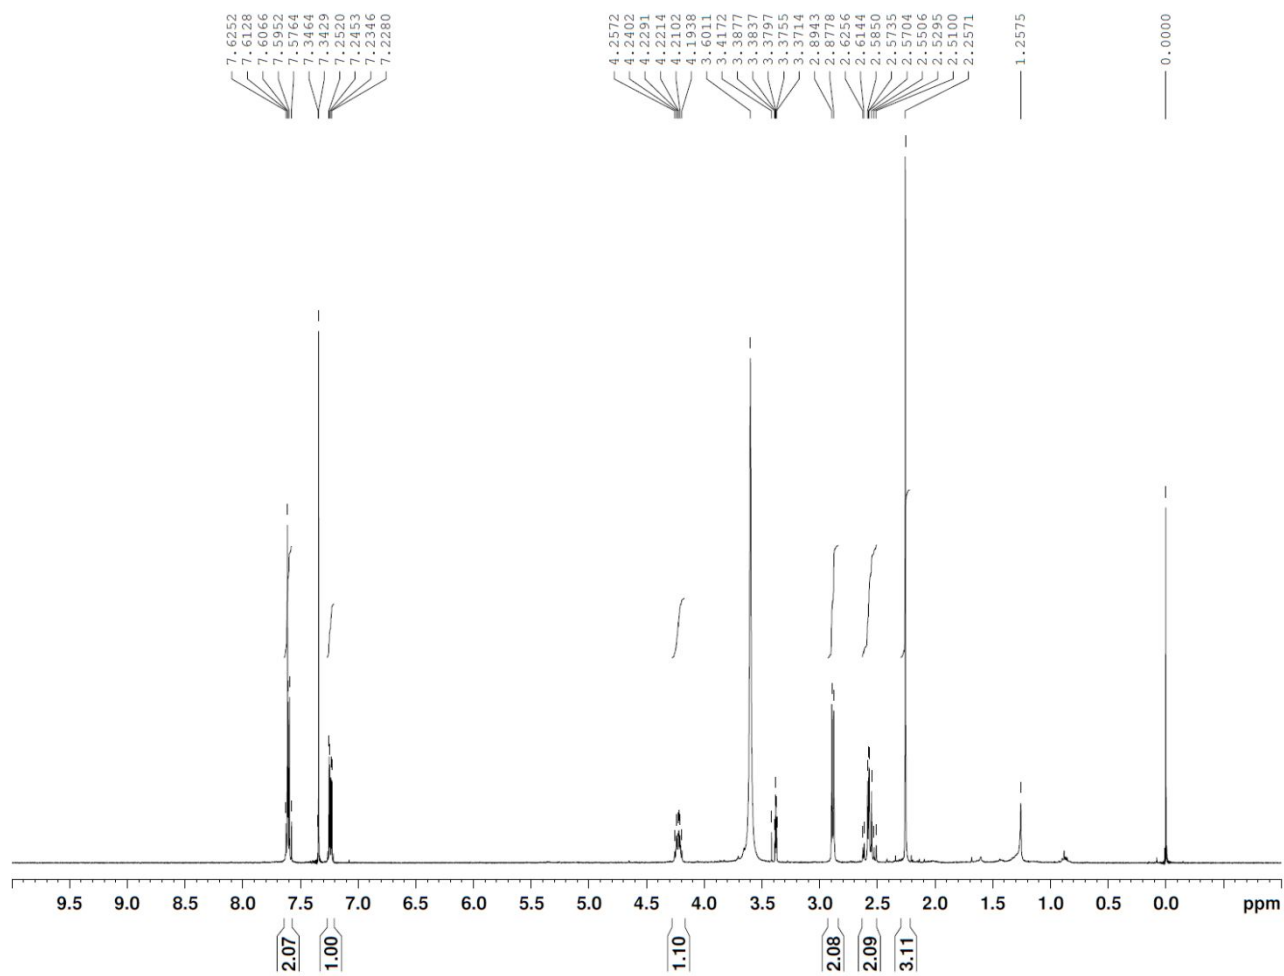



**Figure S28.**  $^{13}\text{C}\{^1\text{H}\}$  NMR spectrum (100 MHz,  $\text{CDCl}_3$ ) of compound **7**.

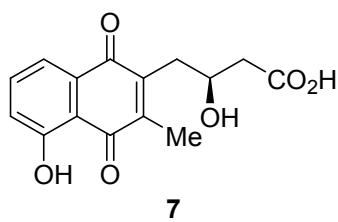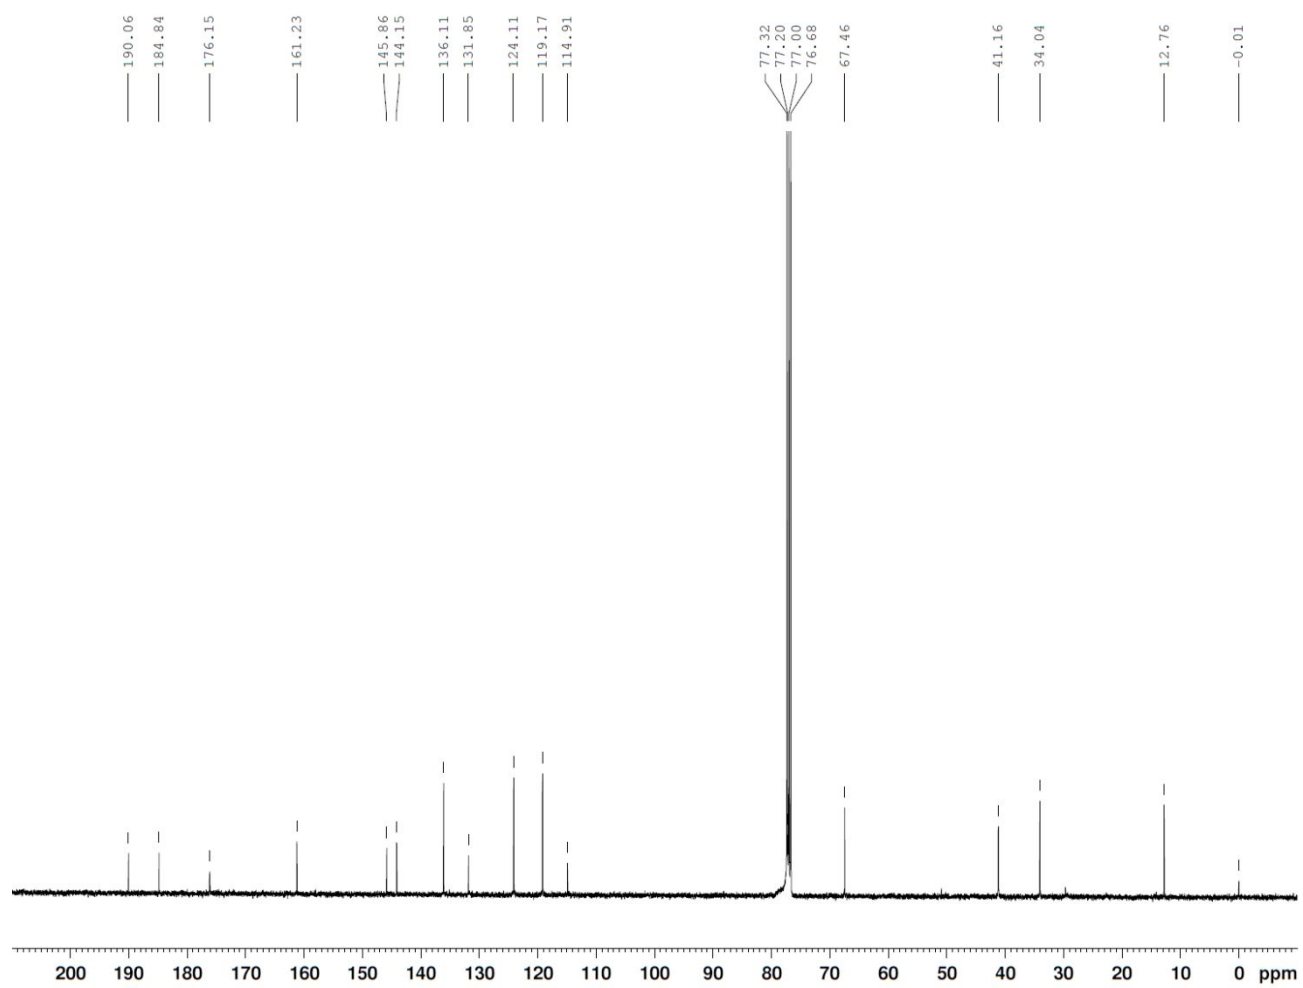

**Figure S29.**  $^1\text{H}$  NMR spectrum (400 MHz,  $\text{CDCl}_3$ , TMS) of compound **19**.

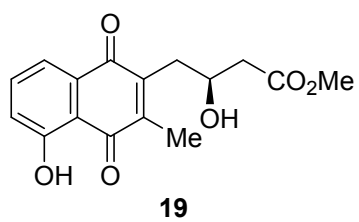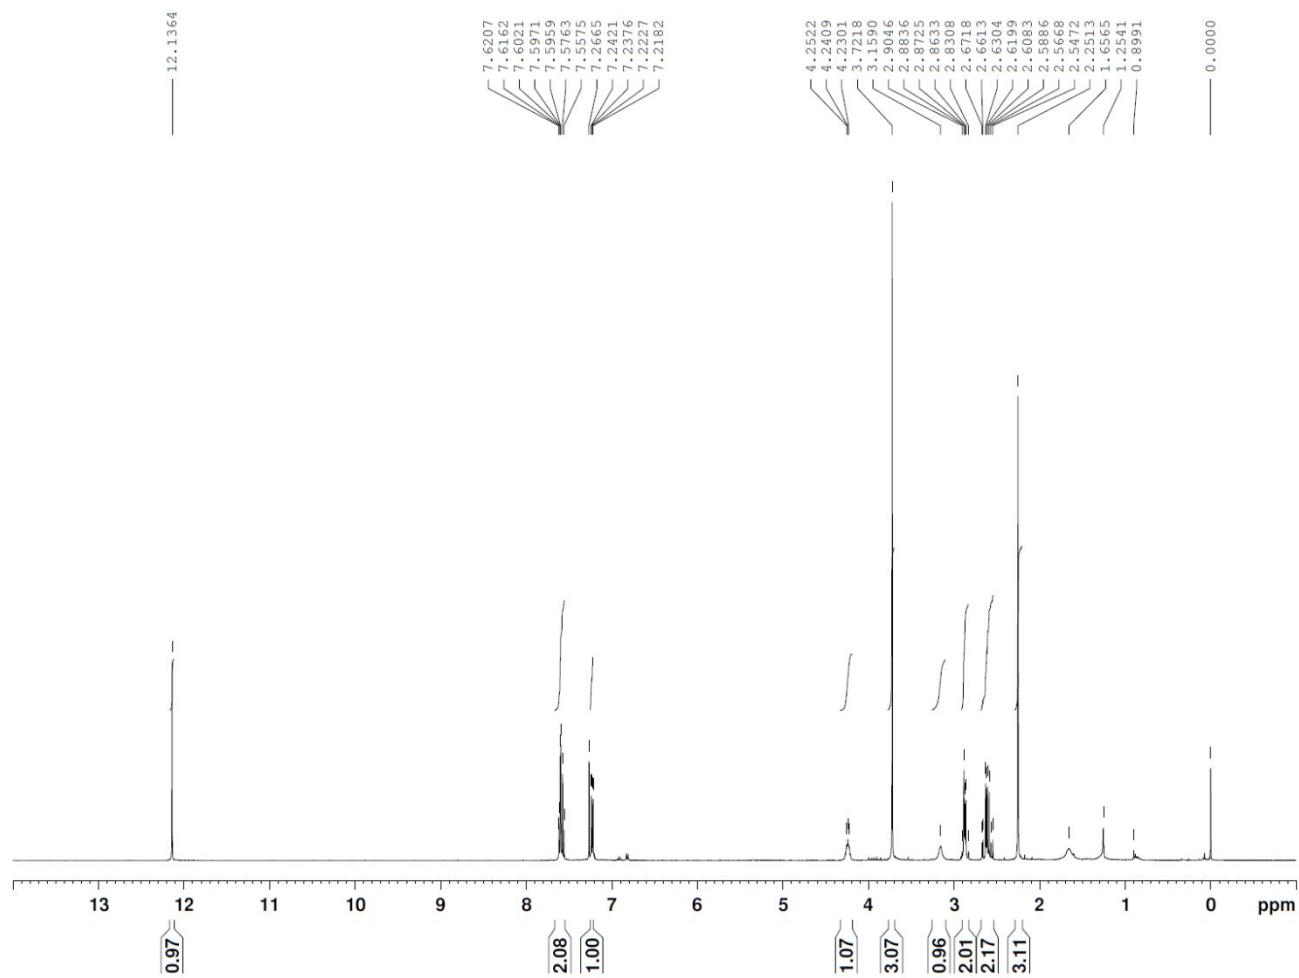

**Figure S30.**  $^{13}\text{C}\{^1\text{H}\}$  NMR spectrum (100 MHz,  $\text{CDCl}_3$ ) of compound **19**.

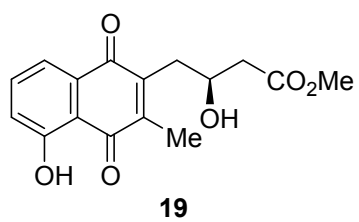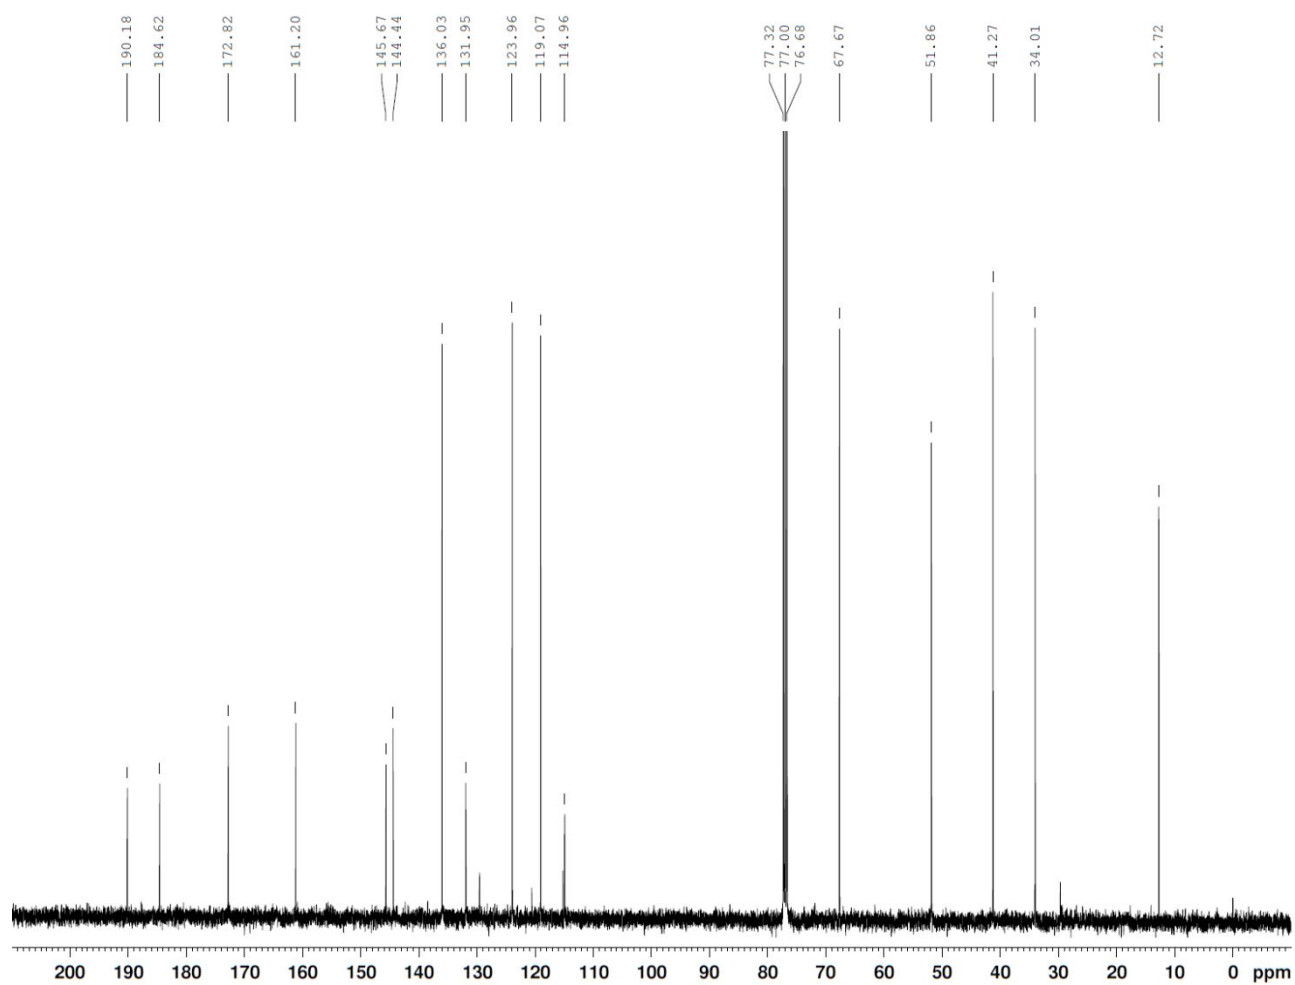

**Figure S31.**  $^1\text{H}$  NMR spectrum (400 MHz,  $\text{CDCl}_3$ , TMS) of compound **24**.

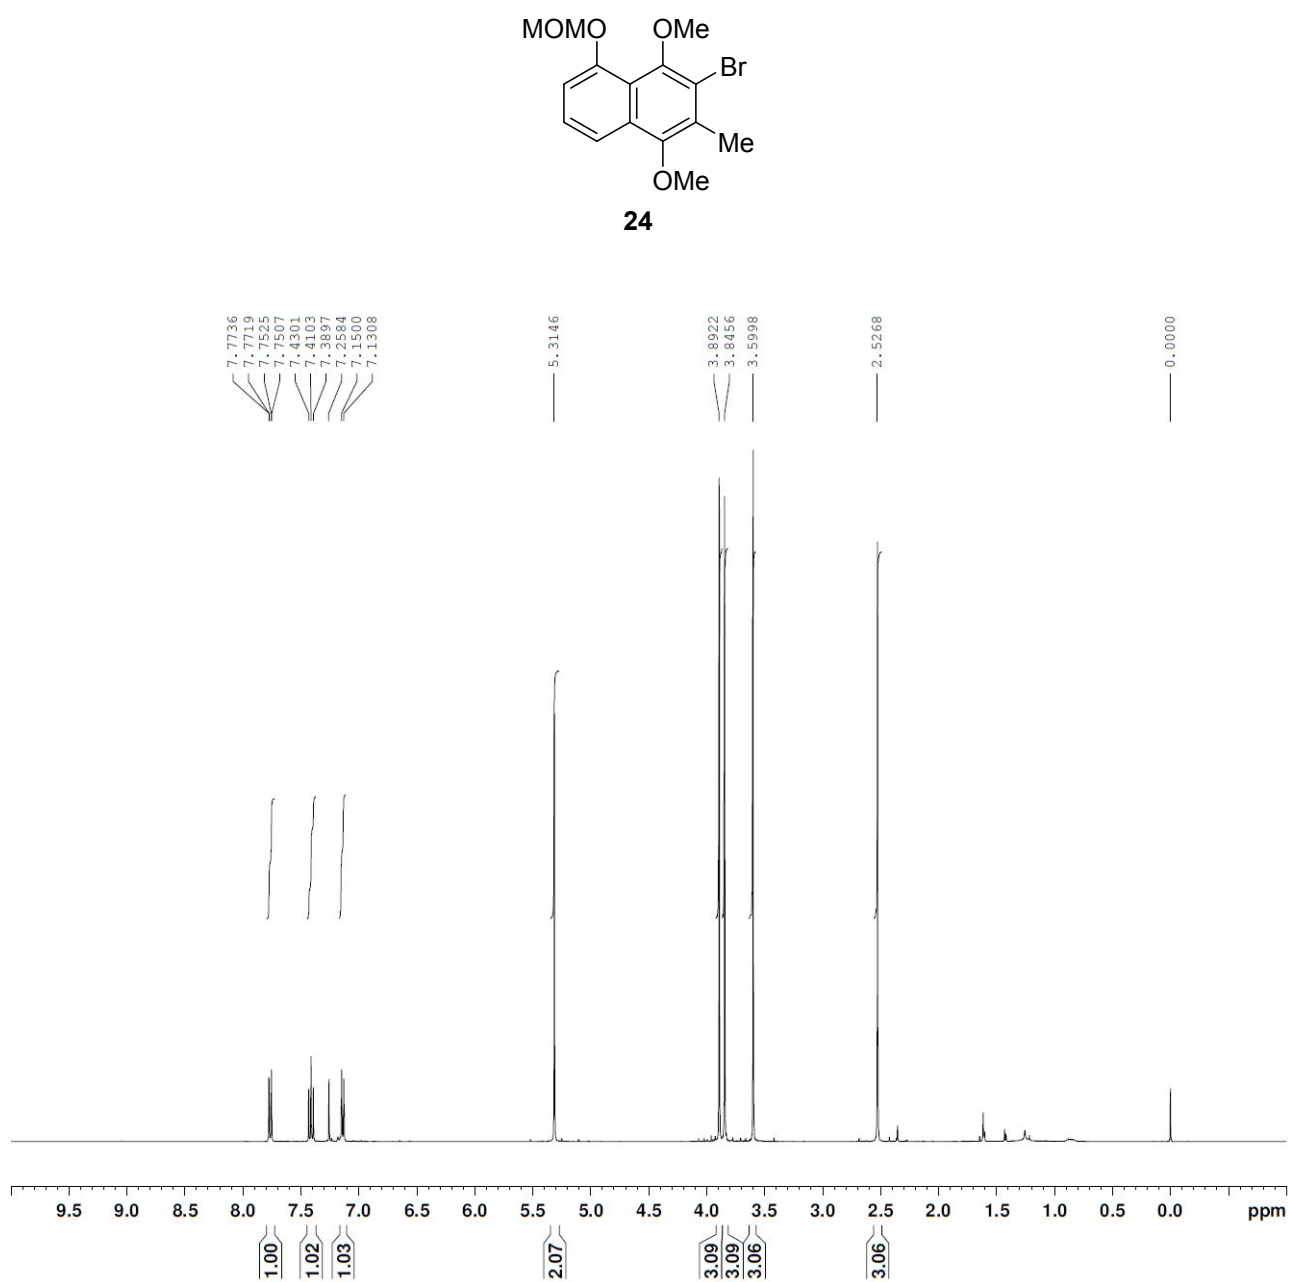

**Figure S32.**  $^{13}\text{C}\{^1\text{H}\}$  NMR spectrum (100 MHz,  $\text{CDCl}_3$ ) of compound **24**.

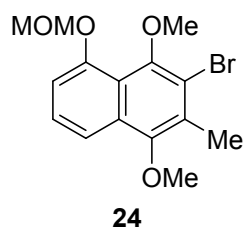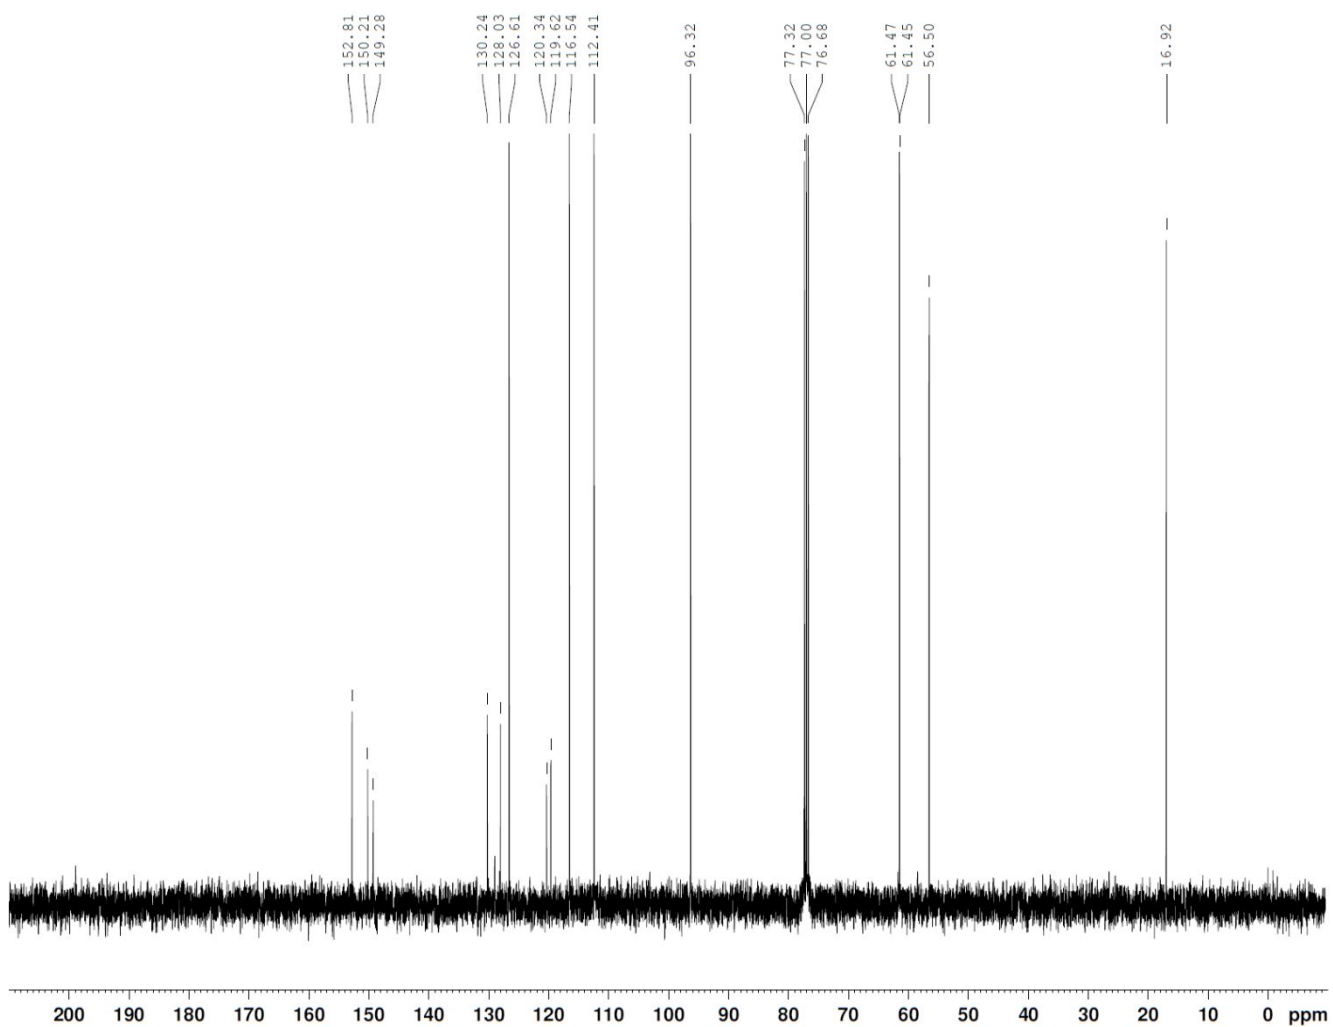

Figure S33. <sup>1</sup>H NMR spectrum (400 MHz, CDCl<sub>3</sub>) of compound 26.

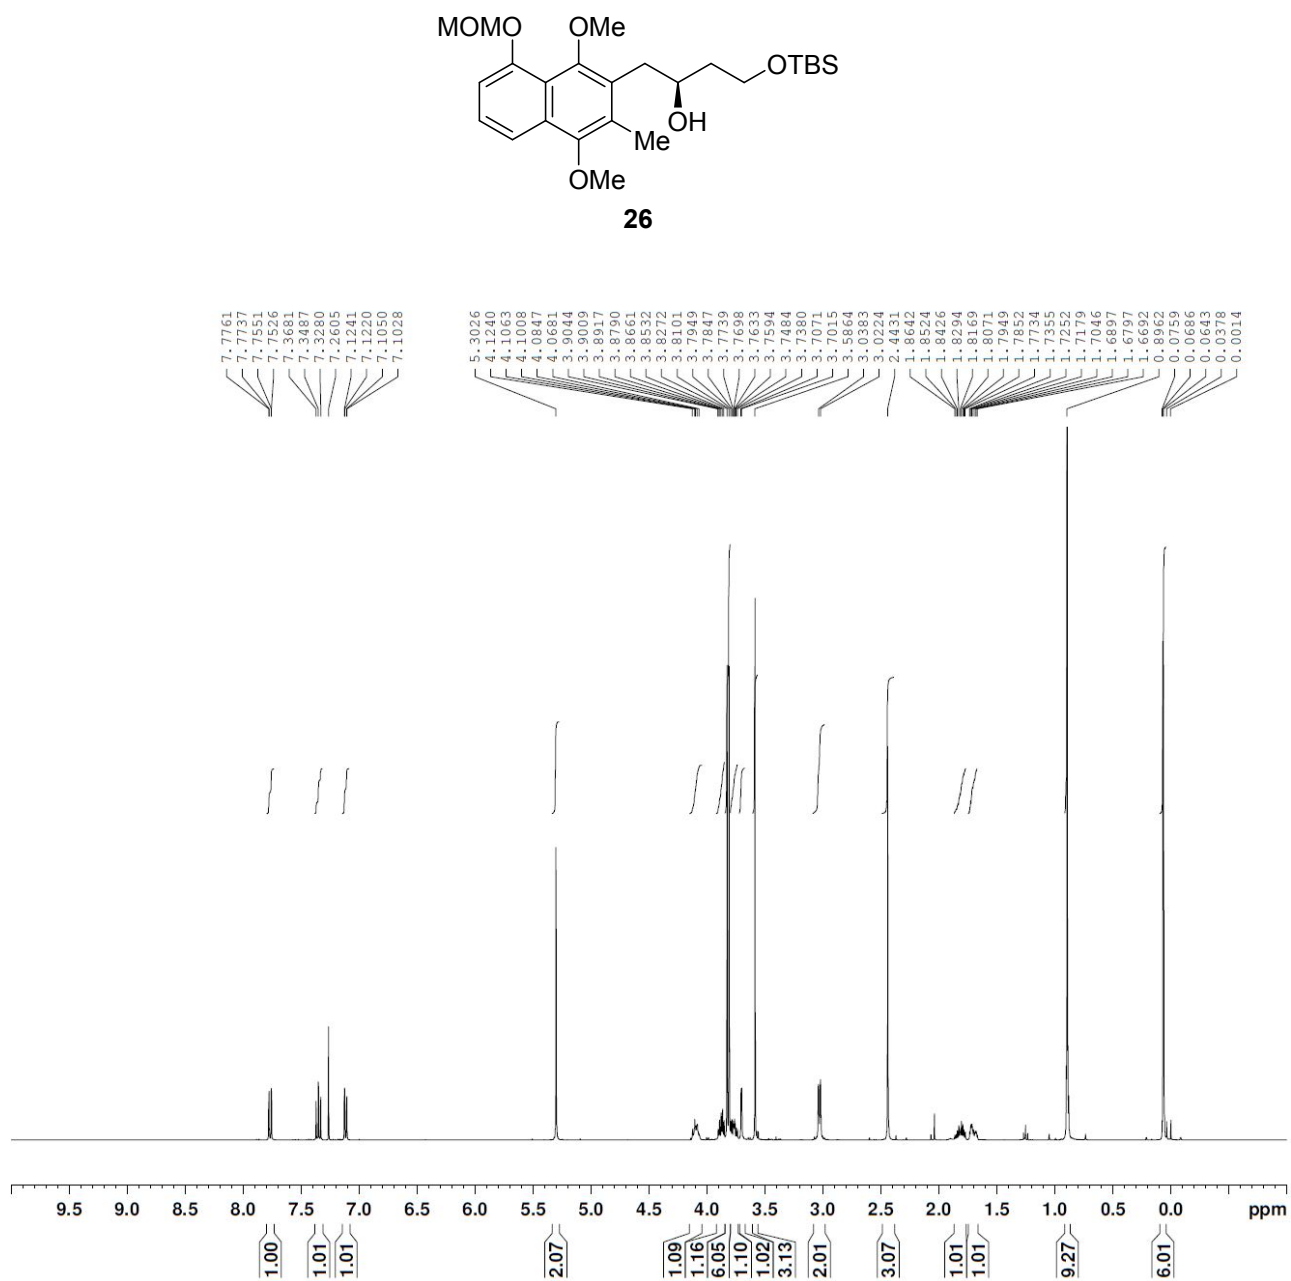

**Figure S34.**  $^{13}\text{C}\{^1\text{H}\}$  NMR spectrum (100 MHz,  $\text{CDCl}_3$ ) of compound **26**.

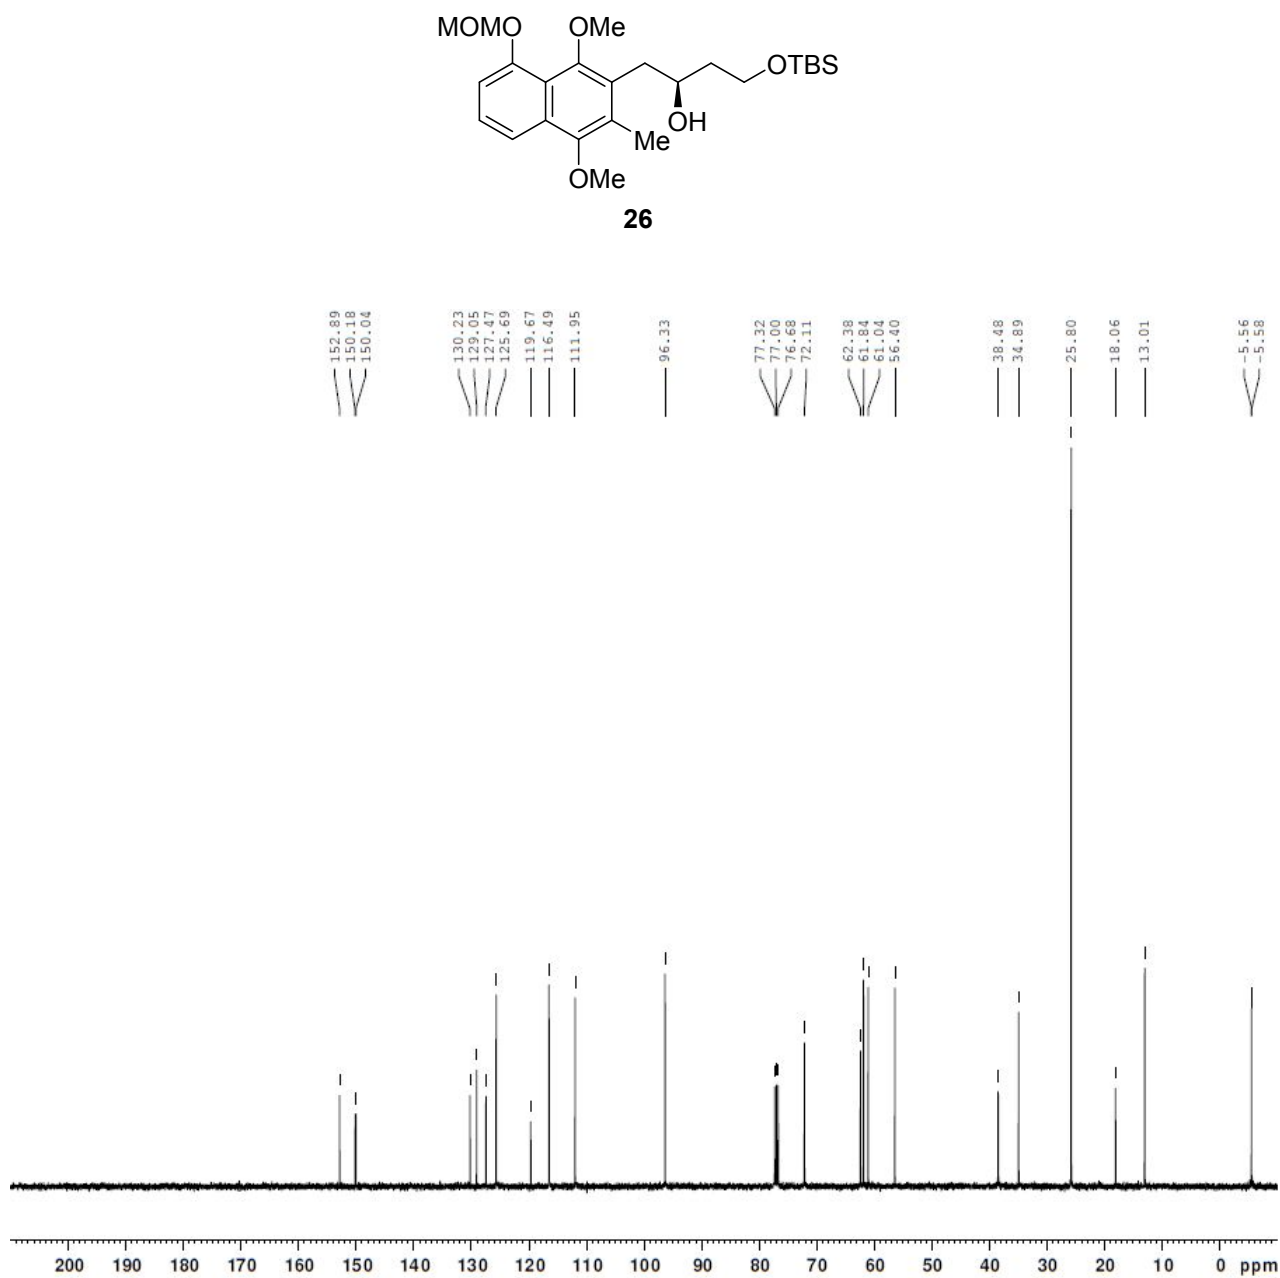





Figure S36.  $^{13}\text{C}\{^1\text{H}\}$  NMR spectrum (100 MHz,  $\text{CDCl}_3$ ) of compound **27**.

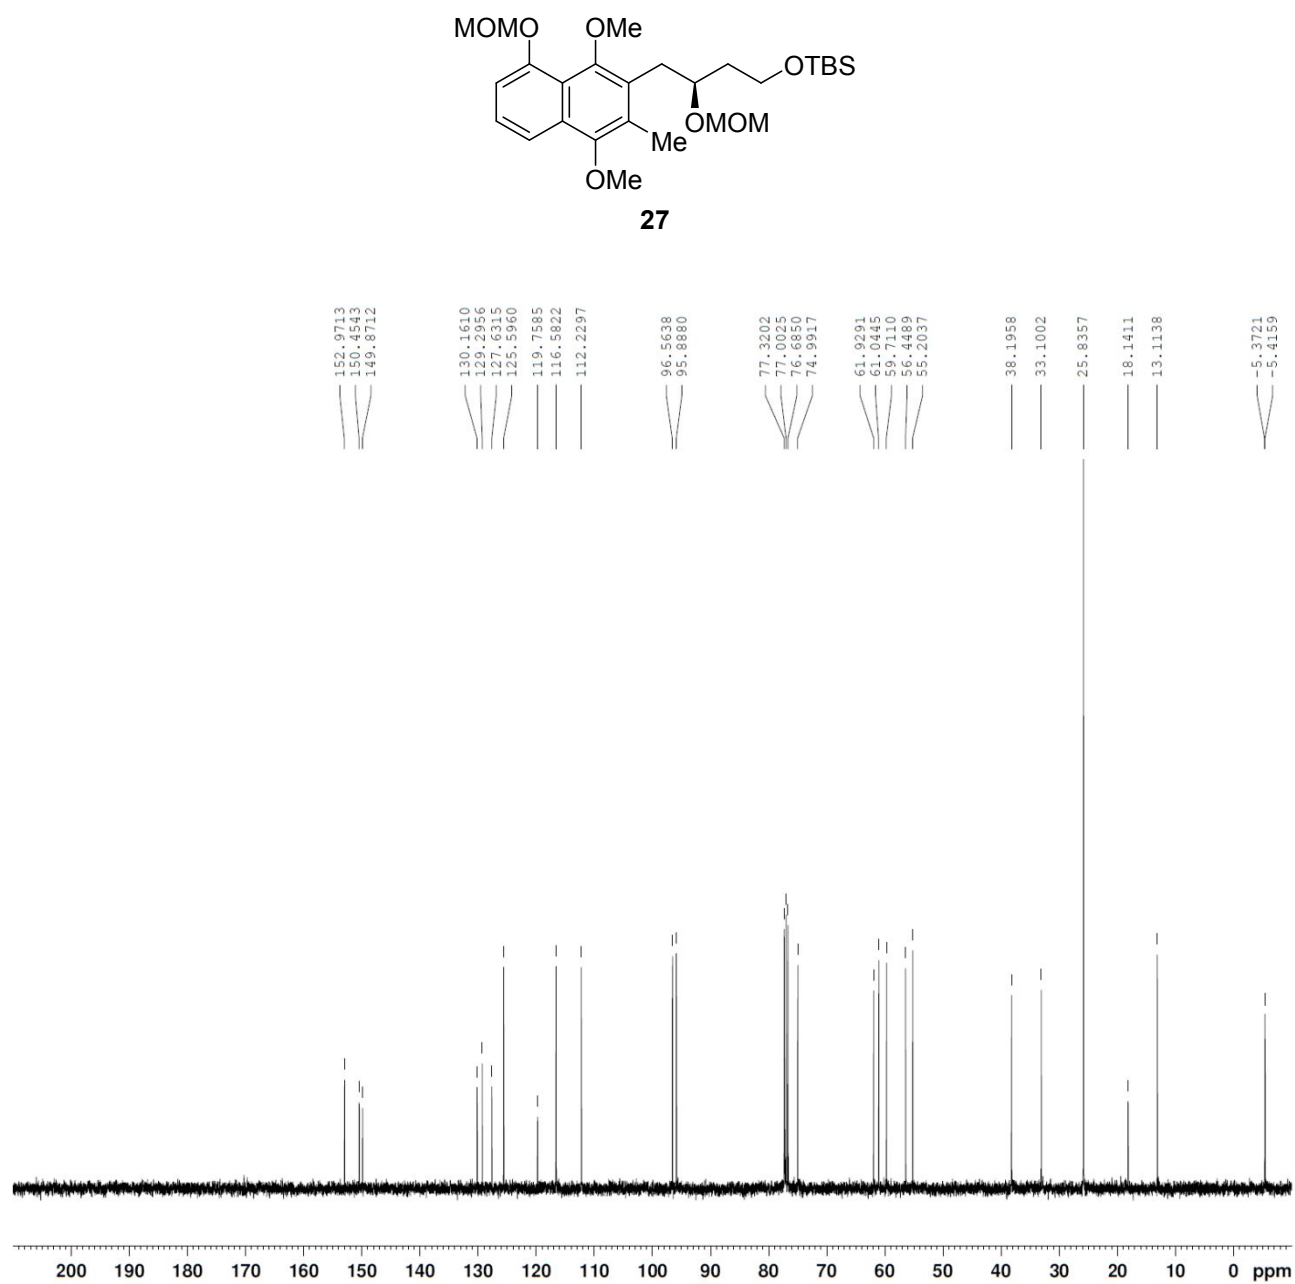

Figure S37. <sup>1</sup>H NMR spectrum (400 MHz, CDCl<sub>3</sub>, TMS) of compound **28**.

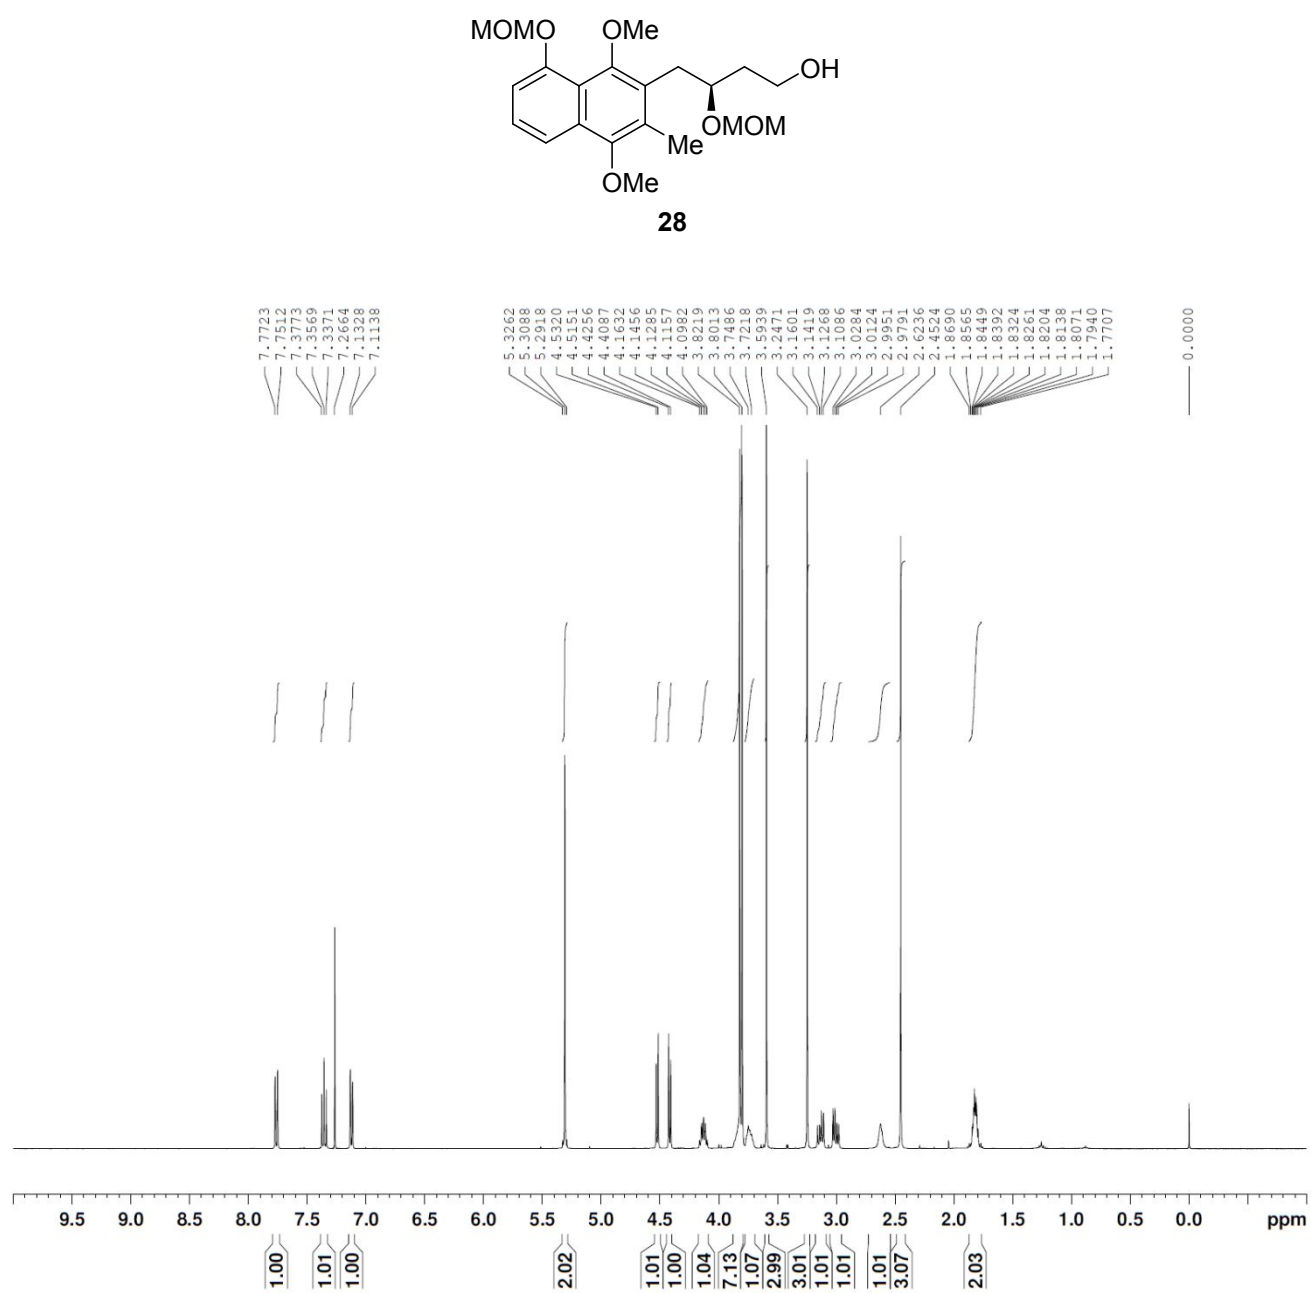

**Figure S38.**  $^{13}\text{C}\{^1\text{H}\}$  NMR spectrum (100 MHz,  $\text{CDCl}_3$ ) of compound **28**.

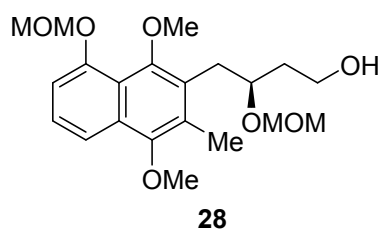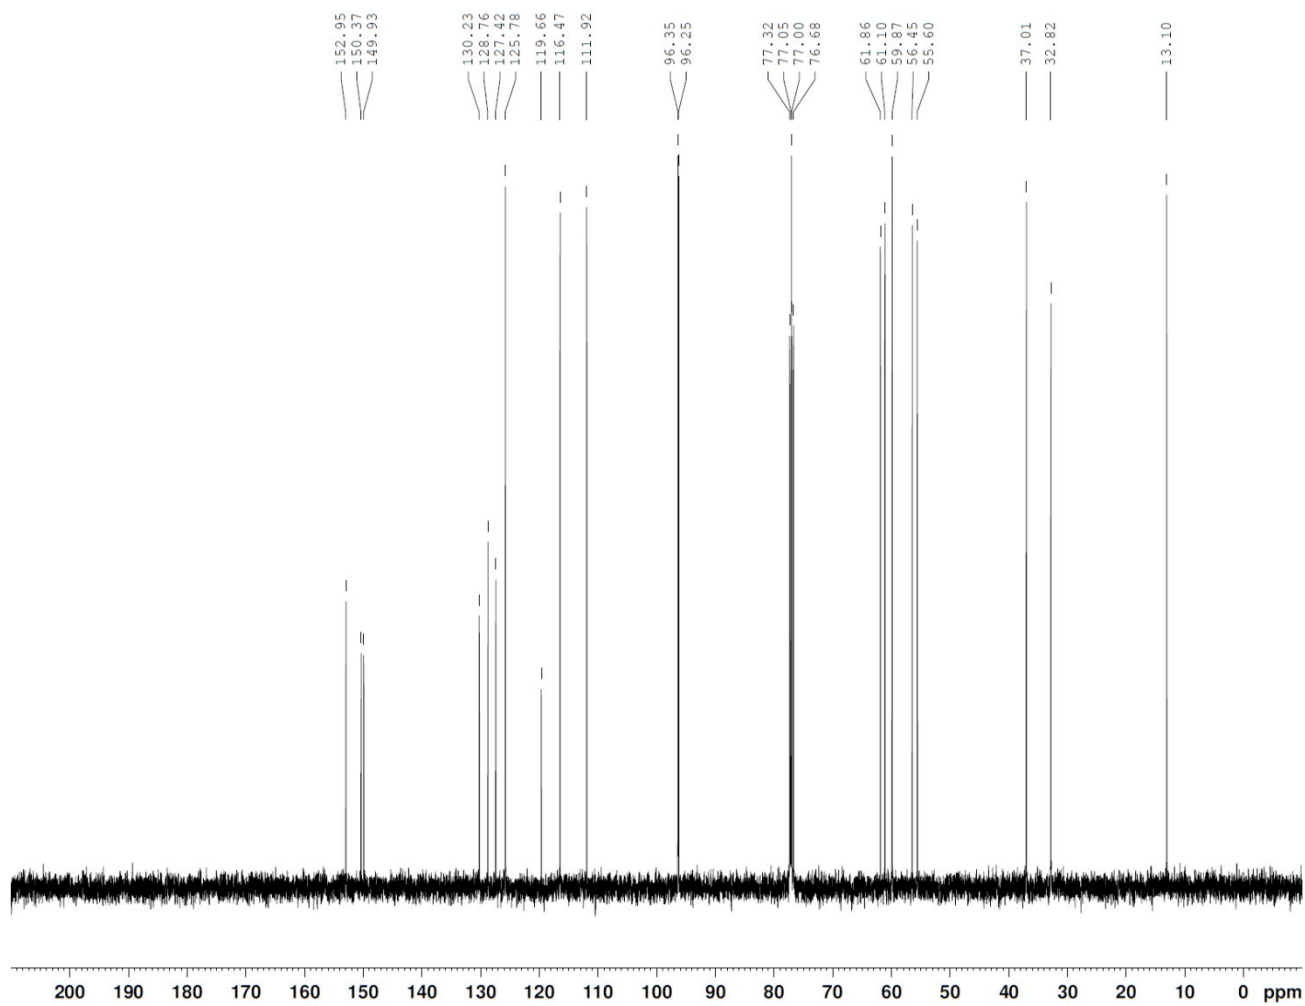

**Figure S39.** <sup>1</sup>H NMR spectrum (400 MHz, CDCl<sub>3</sub>, TMS) of compound **29**.

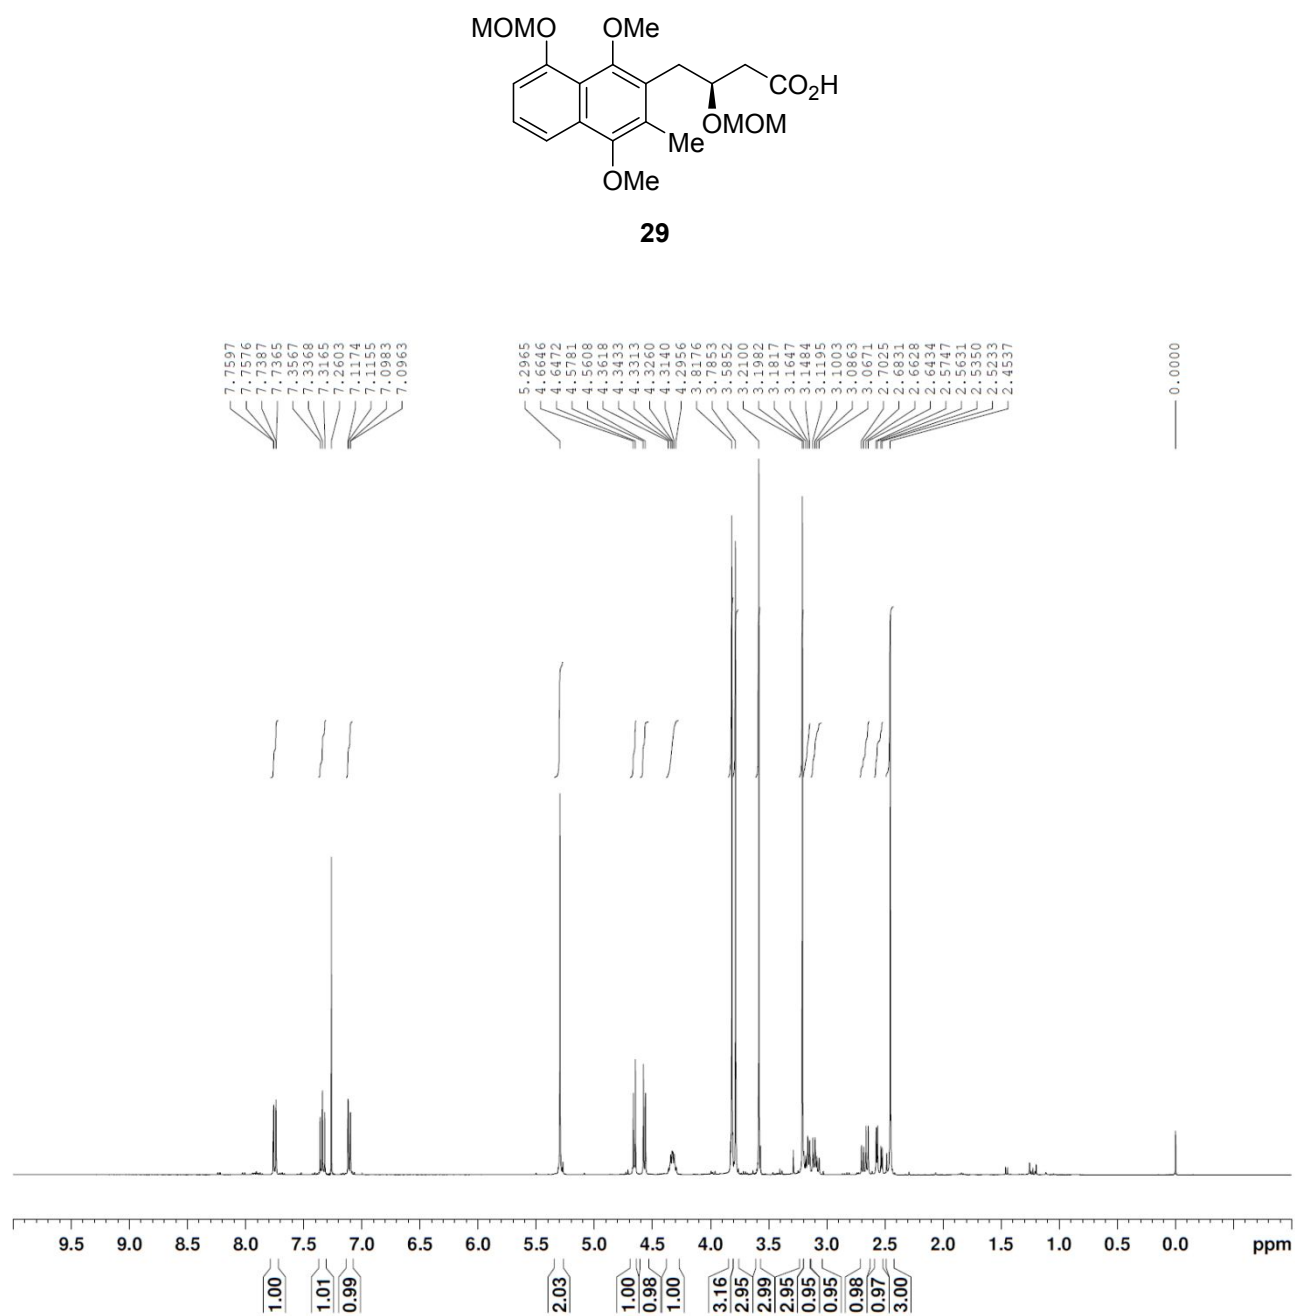

**Figure S40.**  $^{13}\text{C}\{^1\text{H}\}$  NMR spectrum (100 MHz,  $\text{CDCl}_3$ ) of compound **29**.

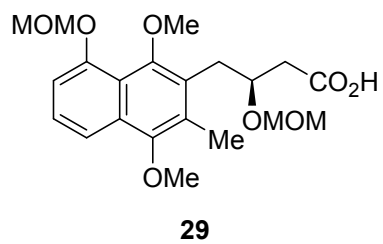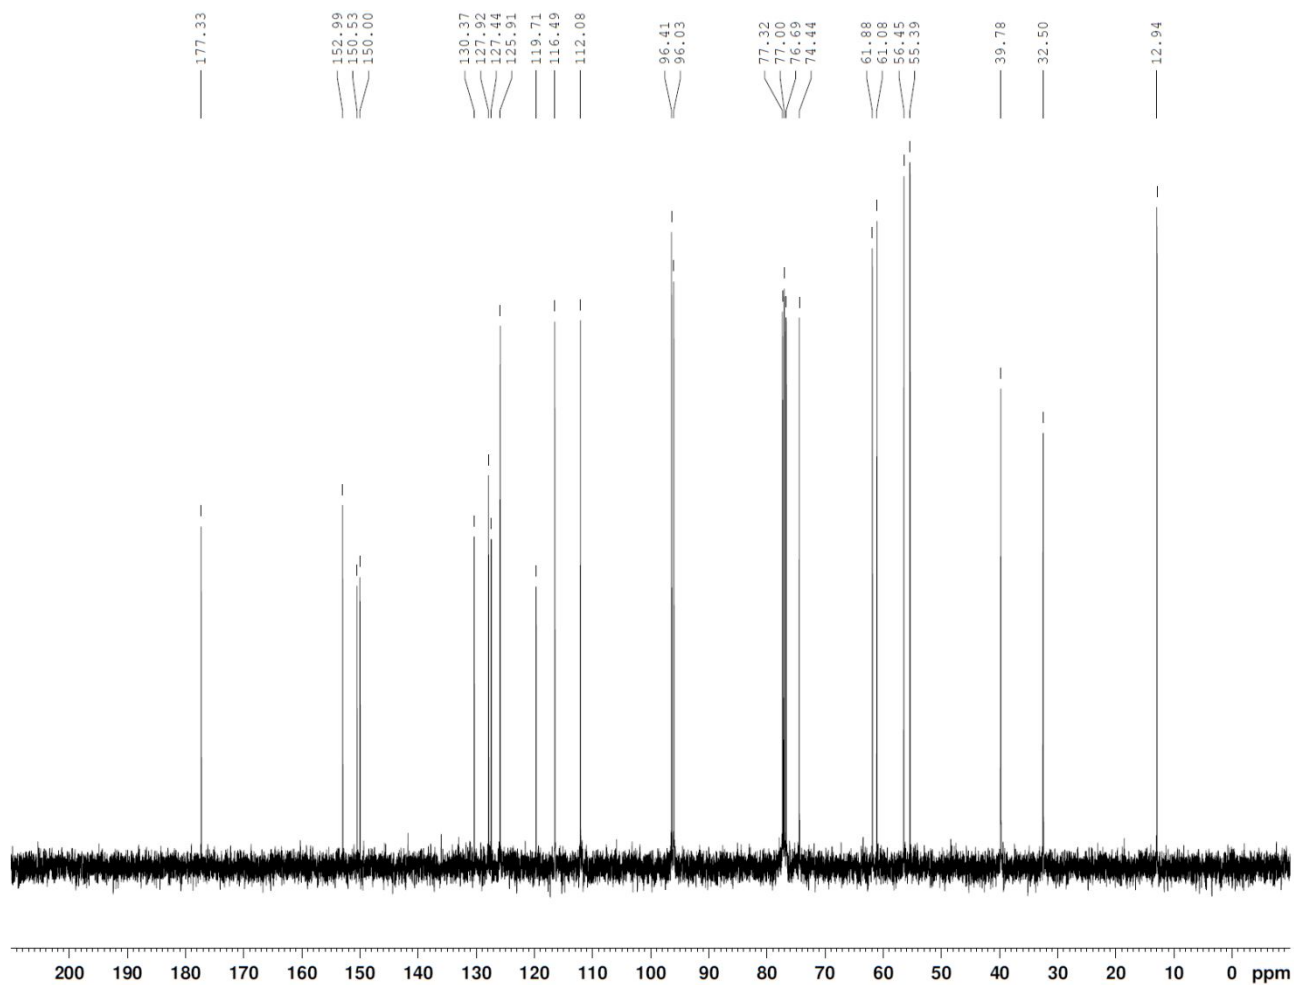

**Figure S41.**  $^1\text{H}$  NMR spectrum (400 MHz, acetone- $d_6$ ) of compound **20**.

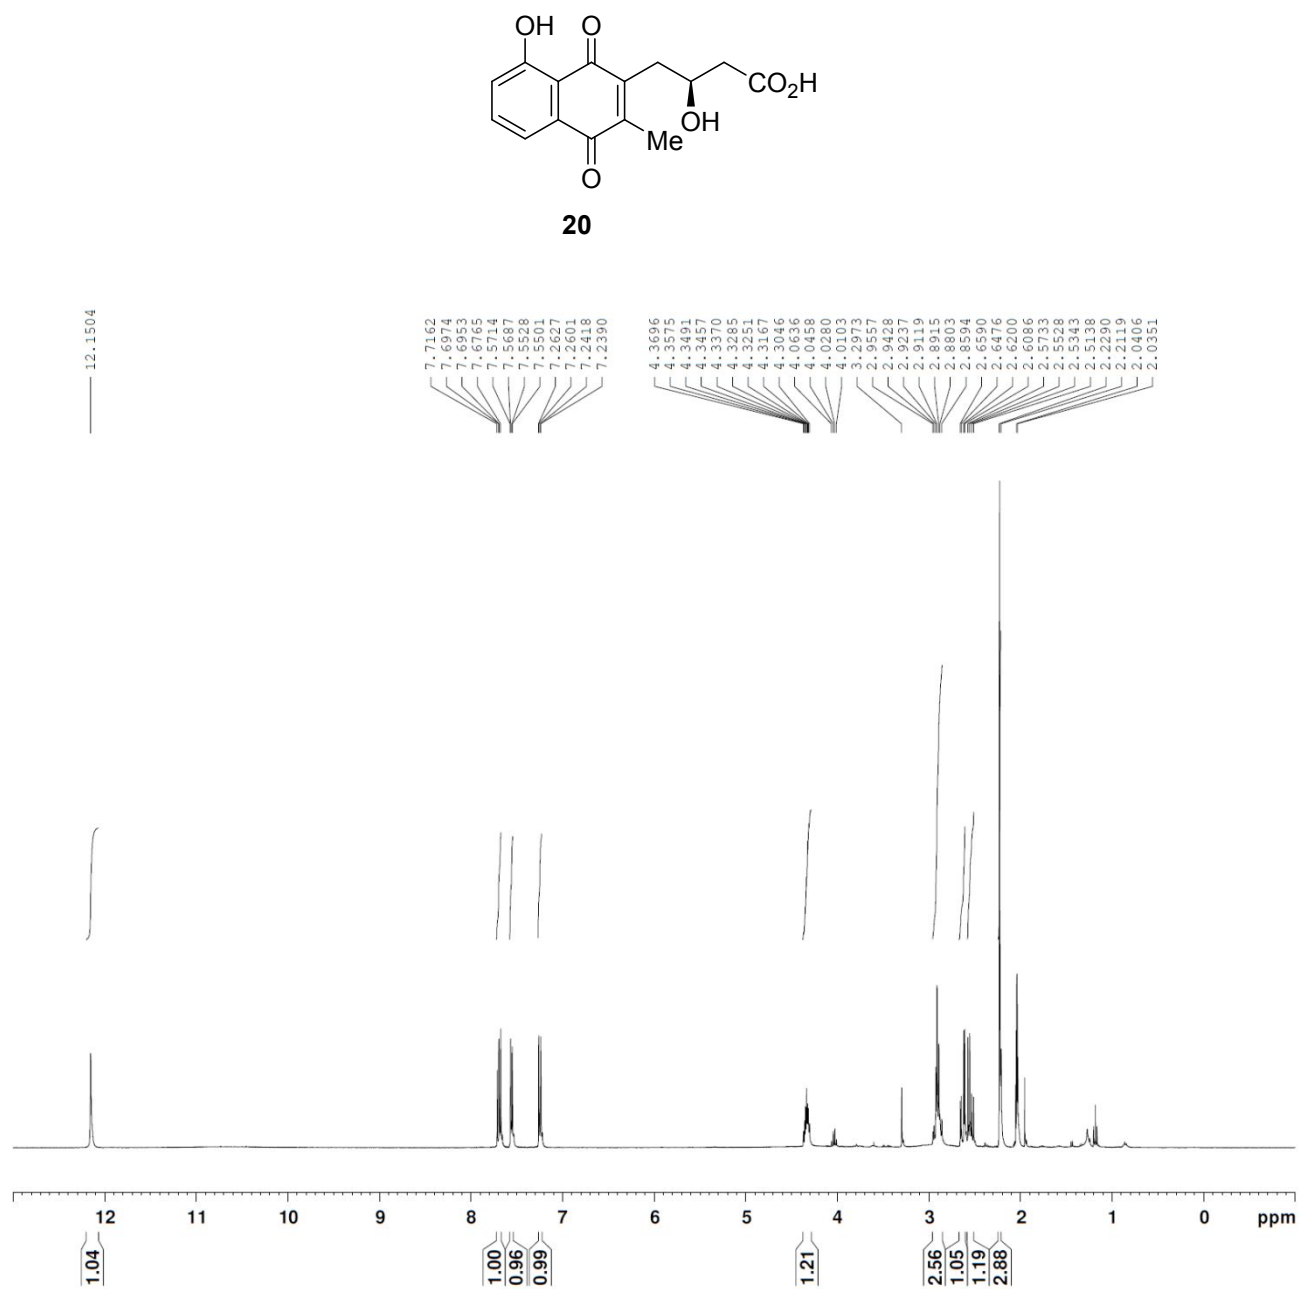

**Figure S42.**  $^{13}\text{C}\{^1\text{H}\}$  NMR spectrum (100 MHz, acetone- $d_6$ ) of compound **20**.

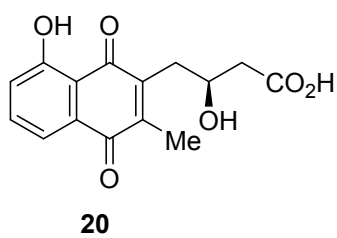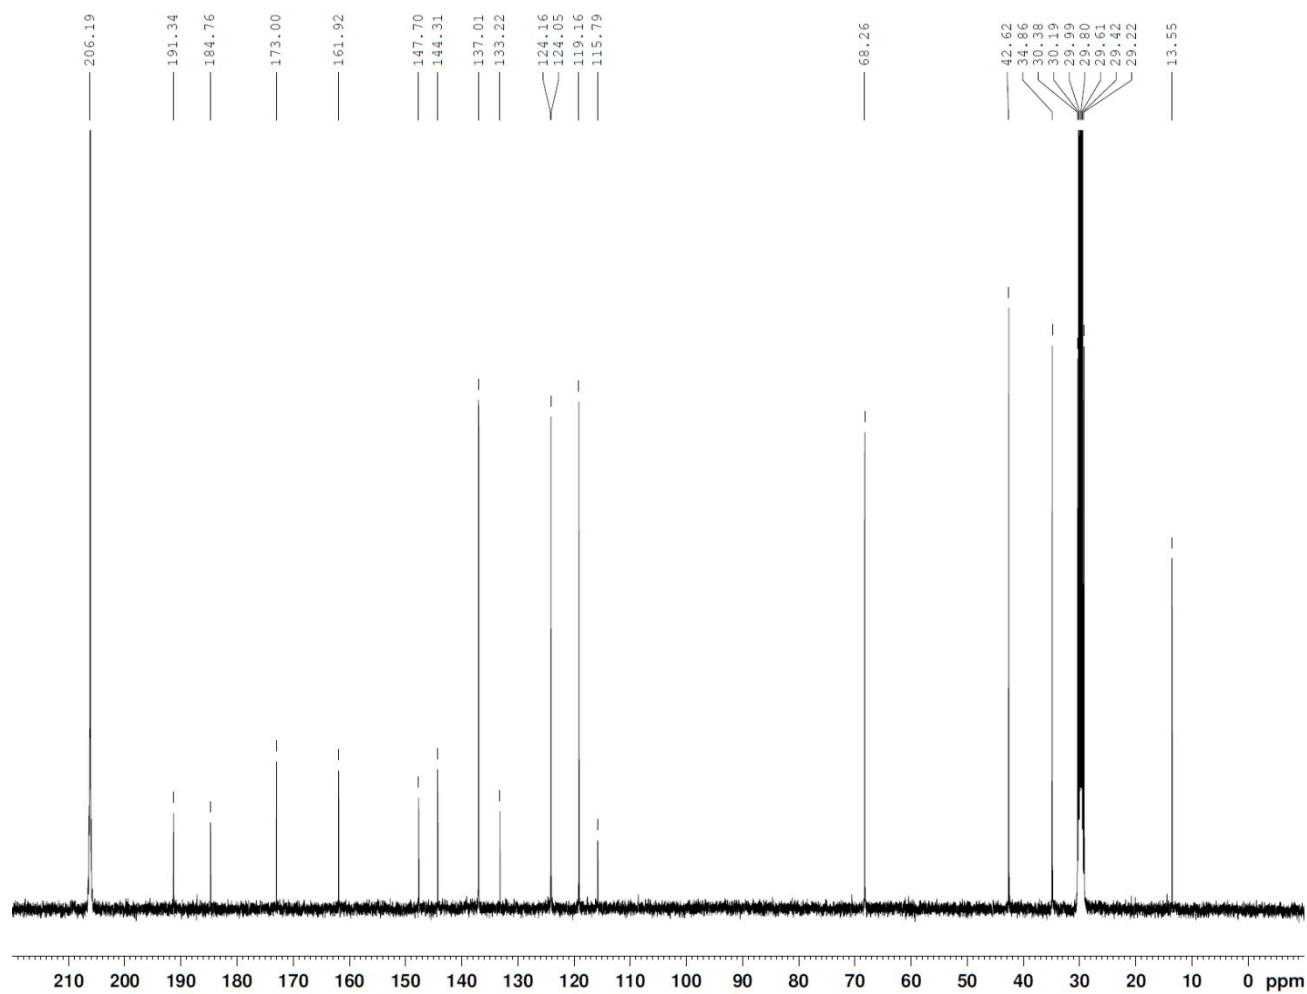

**Figure S43.**  $^1\text{H}$  NMR spectrum (400 MHz,  $\text{CDCl}_3$ , TMS) of compound **21**.

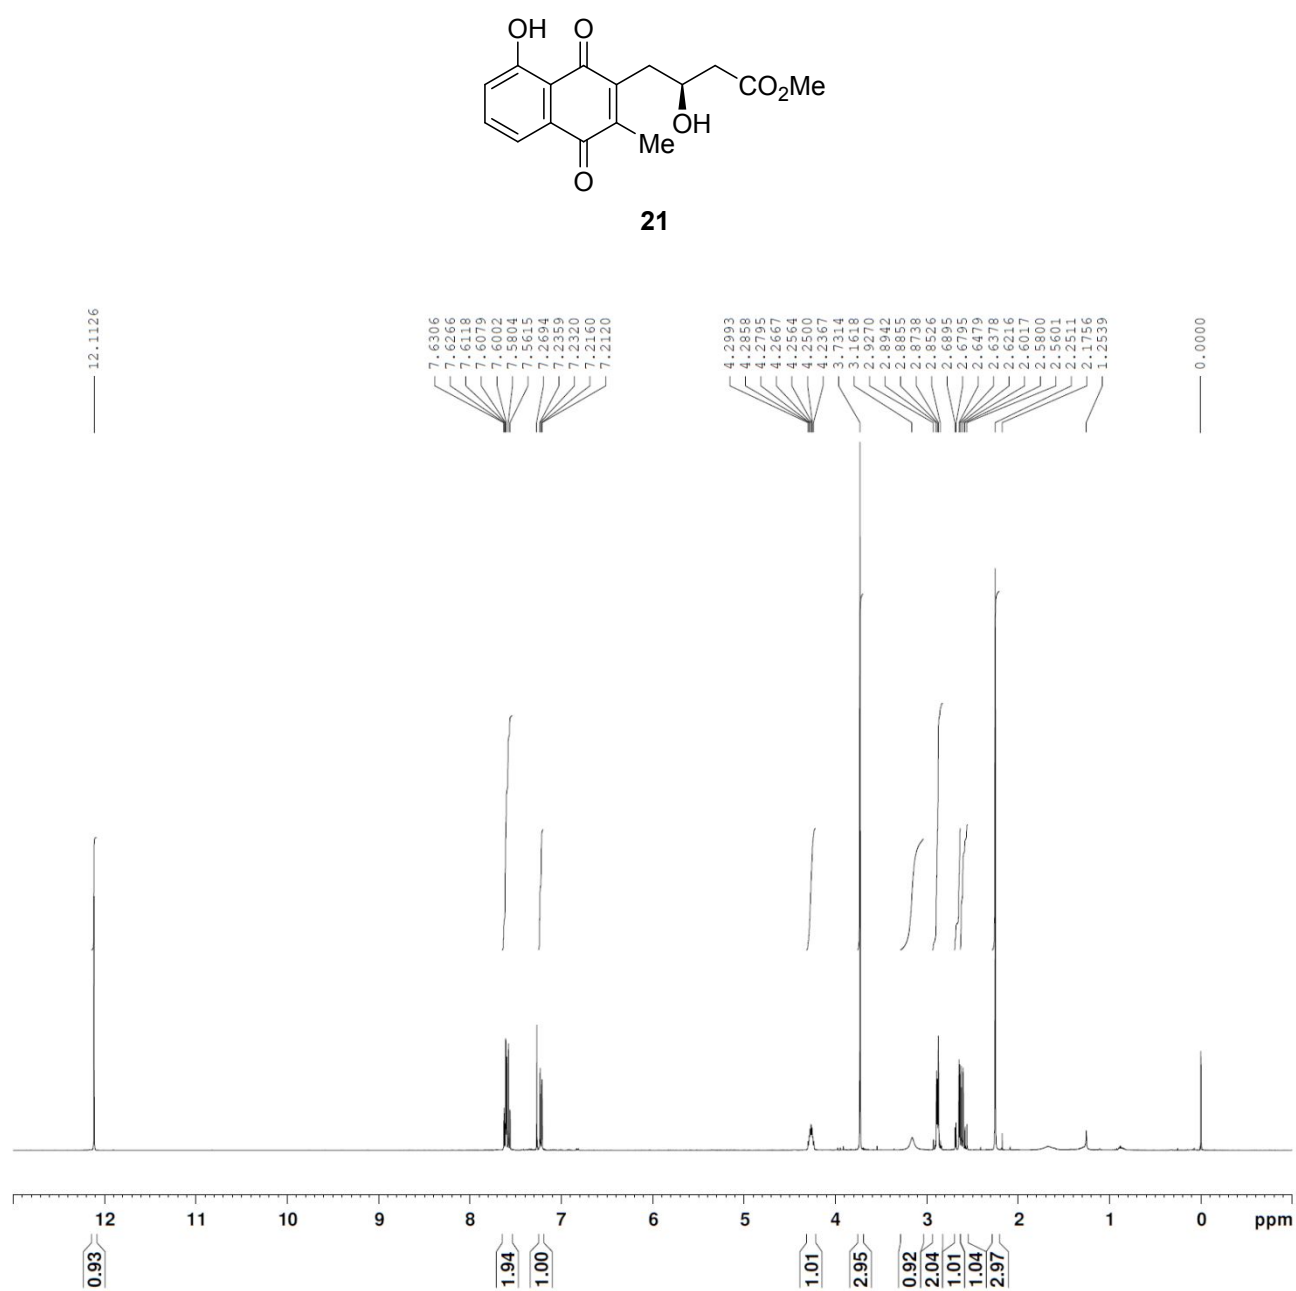



**Figure S44.**  $^{13}\text{C}\{^1\text{H}\}$  NMR spectrum (100 MHz,  $\text{CDCl}_3$ ) of compound **21**.

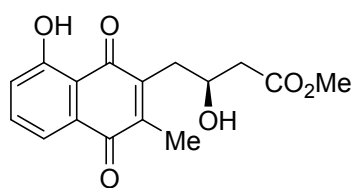

**21**

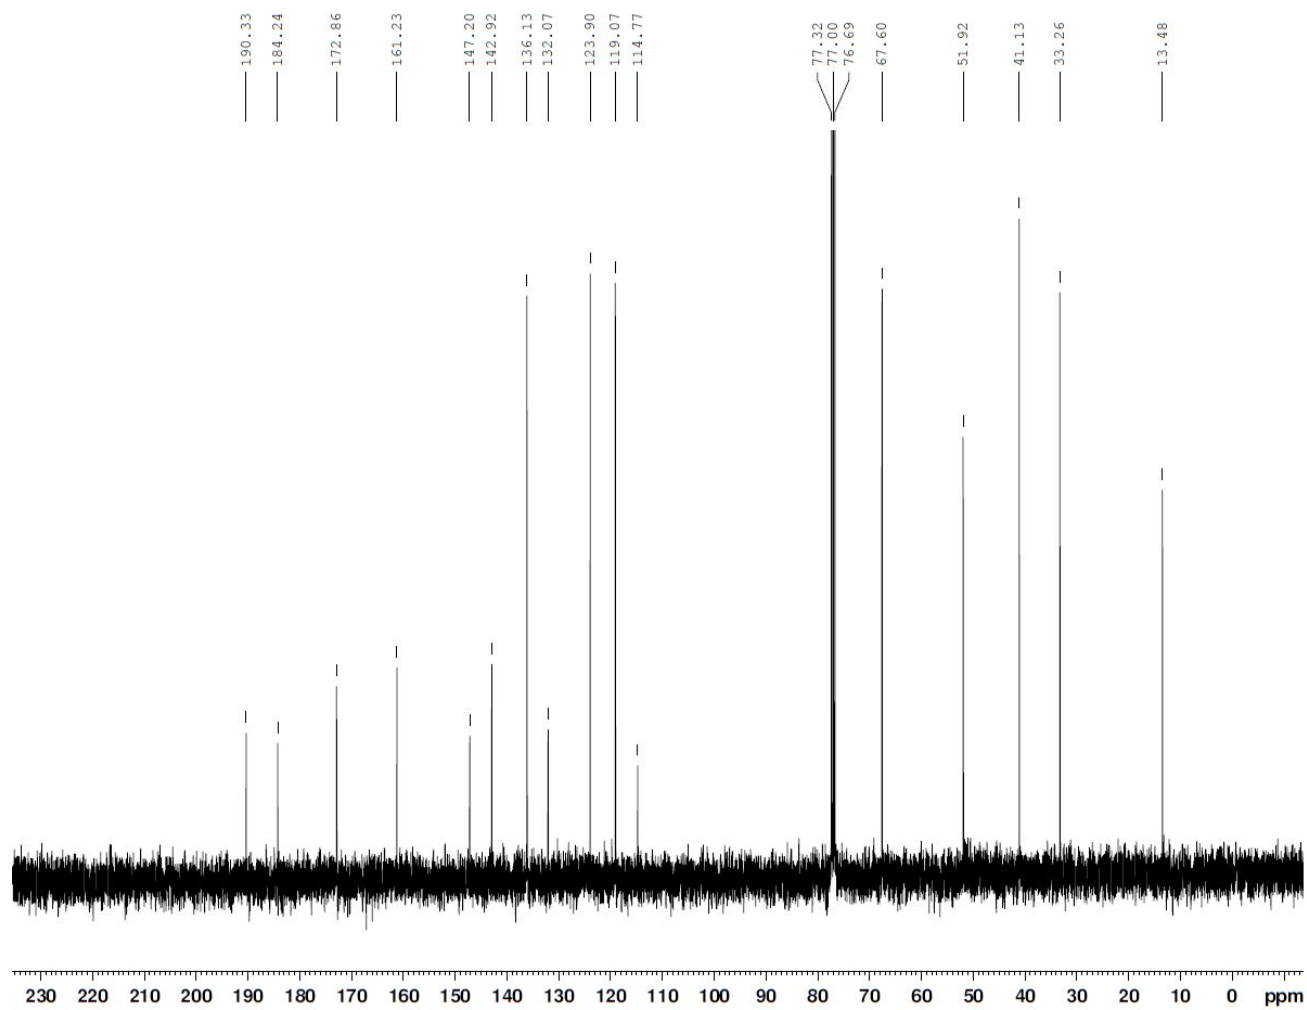

## Reference

(S1) Fiedler, H. P.; Kulik, A.; Schüz, T. C.; Volkmann, C.; Zeeck, A. Biosynthetic capacities of Actinomycetes. 2. Juglomycin Z, a new naphthoquinone antibiotic from *Streptomyces tendae*. *J. Antibiot.* **1994**, *47*, 1116–1122.
